# Supplementary material for: Companion cells with high florigen production express other small proteins and reveal a nitrogen-sensitive FT repressor
Source: eLife. 2025 Oct 30;14:RP102529. doi: 10.7554/eLife.102529 (PMC12575000; doi:10.7554/eLife.102529)
Supplement: Figure 1—source data 7. [file elife-102529-fig1-data7.xlsx]

## Sheet: Sheet1
Spatial expression patterns of genes whose expression are higher in pSUC2:NTF cotyledons than in p35S:NTF cotyledons (fold-change >2, adjusted P < 0.05).
Upregulated genes	Gene Symbol	log2FoldChange	Spatial expression pattern	References
AT5G49660	XIP1/PEPR1	7.00048	Phloem, procambium	Bryan et al. (2012) Planta 235:111–122; Roberts et al. (2016) J. Exp. Bot. 67:4889–4899.
AT3G22640	PAP85	6.74307	Confined to the cotyledons, hypocotyl and root tip	Rozwadowski et al. (2008) BMC Biotechnol. 8:88.
AT3G28890	RLP43	6.43363	Leaf vein	Halter et al. (2021) eLife 10: e62994.
AT1G80760	NIP6;1	4.62226	Vascular bundles	Tanaka et al. (2008) Plant Cell 20:2860–2875.
AT5G43890	YUC5	4.20119	Veins, petioles, and hydathodes	Müller-Moulé et al. (2016) 4: e2574.
AT3G30775	ERD5	3.15291	Veins and hydathodes of leaves	Nakashima et al. (1998) Plant Physiol. 118: 1233–1241.
AT1G09080	BIP3	2.47538	Vascular bundles, hydathodes	Cho and Kanehara (2017) Front. Plant Sci. 8:144.
AT5G63850	AAP4	2.42386	Leaf phloem companion cells	Elashry et al. (2013) Plant Physiol. Biochem. 70:379–386; Kim et al. (2021) Plant Cell 33:511–530.
AT4G08950	EXO	2.07854	Vascular tissue and root tip	Farrar et al. (2003) Plant j. 33:61–73.
AT2G20880	ERF53	1.9509	Vascular bundles	Cheng et al. (2011) Plant Physiol. 158:363–375.
AT1G01010	NAC001	1.91715	Whole tissues	Xie et al. (2000) Gene Dev. 14:3024–3036.
AT5G35750	HK2	1.77143	Leaf vein	Higuchi et al. (2004) PNAS 101:8821–8826.
AT5G54380	THE1	1.59555	Central cylinder including the pericycle	Gonneau et al. (2018) Curr. Biol. 28:2452–2458.
AT4G25810	XTR6	1.58537	Veins	Xu et al. (2020) Plant J. 104:59–75.
AT2G42280	FBH4	1.51968	Leaf vascular tissues and stomata	Ito et al. (2012) PNAS 109:3582–3587.
AT4G39070	BZS1/BBX20	1.51186	Expressed through the entire life circle	Fan et al. (2012) Mol. Plant 5:591–600.
AT2G27690	CYP94C1	1.44424	Vasculature of the leaves and roots	Bruckhoff et al. (2016) PLoS One 11:e0159875.
AT1G75750	GASA1	1.43967	Vasculature and hydathodes of the cotyledons	Raventos et al. (2001) Plant J. 427–438.
AT2G34770	FAH1	1.40552	Young growing tissue and in the pollen grains	König et al. (2012) New Phytol. 196:1086–1097.
AT1G72470	EXO70D1	1.35914	Root meristem	Li et al. (2010) Plant Physiol. 154:1819–1830.
AT1G50460	HKL1	1.3255	Vascular tissue	Karve and Moore (2009) J. Exp Bot. 60: 4137–4149.
AT2G17520	IRE1A	1.26265	Vascular bundles of young plants	Koizumi et al. (2001) Plant Physiol. 127:949–962.
AT4G01720	WRKY47	1.2586	Strong in cotyledons	Feng et al. (2021) Ecotoxicol. Environ. Saf. 220:112406.
AT3G15950	NAI2	1.24816	Vascular tissues of shoots	Wang et al. (2019) Plant Physiol. 180:212–227.
AT3G23030	IAA2	1.16593	Strong in leaf main vascular bundles	Rusak et al. (2010) Biol. Plant. 54:403–414.
AT1G69370	CM3	1.16122	Companion cells	Otero et al. (2022) Nat. Plants 8:954–970.
AT2G33380	RD20	1.1367	Gurad cells. Apparently strong in main vein in cotyledons too.	Aubert et al. (2010) Plant Cell Physiol. 51:1975–1987.
AT1G67560	LOX6	1.09716	Leaf vascular tissues, xylem contact cells	Gasperini et al. (2015) Plant Physiol. 169:2244–2254.
AT1G14290	SBH2	1.093	Strong in main vein of leaves	Chen et al. (2008) Plant Cell 20:1862–1878.
AT5G63450	CYP94B1	1.07705	Vasculatures of leaves and roots	Bruckhoff et al. (2016) PLoS One 11:e0159875.
AT5G15650	RGP2	1.06306	Strongly expressed in actively growing tissues	Drakakaki et al. (2006) Plant Physiol. 142:1480–1492.
AT2G18915	LKP2	1.0325	Ubiquitinously expressed in aerial parts of seedling	Yasuhara et al. (2004) J. Exp. Bot. 405:2015–2027.
AT2G19620	NDL3	1.03099	Expression is missing in cotyledons	Katiyar and Mudgil (2019) Int. Mol. Sci. 20:4736.
AT5G23860	TUB8	1.02682	Endodermal and phloem cells	Chu et al. (1998) Plant Mol. Biol. 37:785–790.
AT2G03070	MED8	1.02172	Ubiquitinously expressed in whole seedling. Apparently strong in vein in cotyledon.	Yuan et al. (2023) Plant J. in press.
AT1G75220	ERDL6	1.01624	Ubiquitinously expressed in whole seedling	Poschet et al. (2011) Plant Physiol. 157:1664–1676.
AT2G06850	XTH4	1.01383	Active in developing secondary vascular tissue	Kushwah et al. (2020) Plant Physiol. 182:1946–1965.
AT5G24030	SLAH3	1.00066	vascular cylinder, xylem pole pericycle	Cubero-Font et al. (2016) Curr. Biol. 26:2213–2220.
			Words in red: vascular tissue related terms
