# Supplementary material for: Companion cells with high florigen production express other small proteins and reveal a nitrogen-sensitive FT repressor
Source: eLife. 2025 Oct 30;14:RP102529. doi: 10.7554/eLife.102529 (PMC12575000; doi:10.7554/eLife.102529)
Supplement: Figure 2—source data 1. [file elife-102529-fig2-data1.xlsx]

## Sheet: Readme
Data S7. Highly expressed genes in each cell cluster compared with average cell population (adjusted P-value < 0.05).

## Sheet: Cluster 1
	p_val	avg_log2FC	pct.1	pct.2	p_val_adj
AT1G67090	3.15768e-256	0.997566	0.992	0.886	6.5465e-252
AT5G38410	7.78501e-204	1.08751	0.946	0.704	1.61399e-199
AT1G29910	7.26119e-182	1.14768	0.887	0.576	1.50539e-177
AT2G34420	1.55246e-153	0.848265	0.959	0.8	3.21855e-149
AT1G29930	8.85044e-150	0.88043	0.945	0.757	1.83487e-145
AT5G54270	1.018e-140	1.00176	0.866	0.649	2.11052e-136
AT1G79040	8.4972e-136	0.877011	0.923	0.741	1.76164e-131
AT5G38420	4.79215e-124	1.15116	0.747	0.465	9.93508e-120
AT3G54890	4.544e-121	0.909525	0.869	0.673	9.42062e-117
AT1G29920	5.68148e-120	0.822334	0.911	0.697	1.17788e-115
AT1G20340	2.83322e-118	1.08276	0.787	0.552	5.87383e-114
AT3G47470	1.08723e-114	0.864822	0.865	0.678	2.25404e-110
AT1G06680	3.41257e-113	1.01093	0.803	0.589	7.07493e-109
AT1G15820	1.11272e-108	1.03671	0.772	0.546	2.30688e-104
AT1G61520	7.71563e-107	0.971992	0.789	0.573	1.5996e-102
AT2G30570	2.467e-102	0.924759	0.796	0.585	5.11458e-98
AT1G08380	1.47827e-97	0.905944	0.788	0.599	3.06475e-93
AT2G39730	1.64788e-97	0.871621	0.806	0.615	3.41639e-93
AT3G61470	5.99156e-95	1.0035	0.739	0.526	1.24217e-90
AT4G28750	6.83077e-94	0.99395	0.748	0.534	1.41615e-89
AT1G31330	7.10246e-94	0.901587	0.787	0.602	1.47248e-89
AT4G10340	2.80999e-92	0.90013	0.781	0.579	5.82568e-88
AT3G27690	2.71795e-88	1.29118	0.568	0.318	5.63485e-84
AT1G55670	2.61384e-81	1.01969	0.697	0.5	5.41902e-77
AT3G01500	2.95708e-80	1.18683	0.578	0.356	6.13062e-76
AT5G66570	1.29094e-78	0.937977	0.73	0.566	2.67639e-74
AT4G38970	1.37609e-74	1.04615	0.627	0.421	2.8529e-70
AT5G01530	1.61488e-74	1.01714	0.646	0.452	3.34797e-70
AT2G06520	3.37267e-73	1.02484	0.656	0.463	6.99221e-69
AT4G02770	3.39861e-72	0.960015	0.688	0.5	7.04599e-68
AT2G05100	1.40466e-66	0.802003	0.729	0.573	2.91214e-62
AT2G05070	4.10367e-66	0.935112	0.661	0.473	8.50774e-62
AT1G30380	2.88361e-63	0.974047	0.616	0.432	5.97831e-59
AT5G64040	1.53532e-62	0.966655	0.649	0.479	3.18302e-58
AT5G14740	1.39585e-55	0.992366	0.545	0.356	2.89388e-51
AT1G52230	1.26056e-54	0.981443	0.567	0.403	2.61339e-50
AT1G60950	6.09977e-54	1.10028	0.535	0.366	1.2646e-49
AT4G01150	3.44362e-53	1.06282	0.515	0.34	7.1393e-49
AT3G21055	1.83868e-51	0.989563	0.553	0.39	3.81194e-47
AT2G46820	2.44746e-46	1.05485	0.485	0.327	5.07406e-42
AT2G34430	4.56963e-46	0.879565	0.573	0.406	9.47376e-42
AT4G12800	4.42565e-42	0.840615	0.575	0.44	9.17526e-38
AT4G05180	1.99232e-41	1.0164	0.479	0.341	4.13048e-37
AT3G08940	6.88385e-41	1.00134	0.501	0.359	1.42716e-36
AT2G21330	5.02948e-39	1.04954	0.435	0.291	1.04271e-34
AT5G38430	1.79394e-36	0.846336	0.48	0.323	3.71919e-32
AT1G67740	3.53424e-33	0.919333	0.455	0.327	7.32718e-29
AT1G12900	4.28029e-33	1.00055	0.436	0.31	8.87391e-29
AT1G51400	6.8802e-33	1.02298	0.441	0.317	1.4264e-28
AT1G44575	9.21071e-32	0.95861	0.446	0.325	1.90956e-27
AT3G47070	1.82939e-26	0.992404	0.391	0.28	3.79268e-22
AT1G03130	1.93994e-25	0.914723	0.433	0.335	4.02187e-21
AT2G26500	4.08638e-24	0.81546	0.439	0.335	8.47189e-20
AT1G42970	2.27922e-23	0.971004	0.355	0.249	4.72528e-19
AT3G50820	2.7012e-22	0.987134	0.354	0.257	5.60013e-18
AT3G14420	1.40439e-21	0.989405	0.325	0.228	2.91158e-17
AT3G26650	4.46476e-21	0.744541	0.441	0.344	9.25634e-17
AT4G09650	2.01262e-18	1.00189	0.331	0.246	4.17255e-14
AT5G54770	5.6388e-18	0.673185	0.461	0.384	1.16904e-13
AT3G16140	3.21542e-17	0.887653	0.378	0.301	6.6662e-13
AT4G21280	5.14259e-15	0.858305	0.336	0.264	1.06616e-10
AT4G03280	1.02405e-14	0.808245	0.371	0.302	2.12307e-10
AT3G62030	2.85184e-14	1.10066	0.204	0.132	5.91243e-10
AT4G37930	1.10427e-13	0.957735	0.26	0.188	2.28938e-09
AT4G35090	7.19585e-13	0.933145	0.271	0.202	1.49184e-08
AT4G32260	3.88032e-12	0.773764	0.347	0.289	8.04467e-08
AT4G26530	4.67878e-12	1.09844	0.159	0.097	9.70004e-08
AT3G12780	2.18327e-11	0.883023	0.258	0.196	4.52636e-07
AT2G13360	2.32776e-11	0.695952	0.308	0.244	4.82592e-07
AT1G09340	6.31487e-11	0.89213	0.242	0.18	1.3092e-06
AT3G56940	9.40452e-11	0.754224	0.338	0.284	1.94974e-06
AT3G55800	2.06362e-10	1.076	0.198	0.141	4.27831e-06
AT1G74470	9.35206e-10	0.919148	0.256	0.202	1.93887e-05
AT1G03600	1.22432e-09	0.821599	0.262	0.206	2.53827e-05
AT5G35630	4.7412e-09	0.949953	0.233	0.182	9.82945e-05
AT4G34620	7.70608e-09	0.646241	0.34	0.296	0.000159762
AT4G04640	3.58175e-08	0.8943	0.237	0.189	0.000742569
AT5G42530	4.67983e-07	0.796427	0.137	0.094	0.00970223
AT1G32470	6.16518e-07	0.992157	0.15	0.108	0.0127817
AT2G20260	7.91995e-07	0.821085	0.257	0.219	0.0164196
AT5G09660	1.24242e-06	0.787485	0.219	0.176	0.0257579
AT1G11860	1.42384e-06	1.00828	0.162	0.122	0.0295191
AT2G25510	1.59389e-06	0.73853	0.119	0.08	0.0330446

## Sheet: Cluster 2
	p_val	avg_log2FC	pct.1	pct.2	p_val_adj
AT5G38410	1.96818e-35	0.503091	0.924	0.764	4.08043e-31
AT2G34420	2.37263e-31	0.409729	0.948	0.838	4.91893e-27
AT1G79040	1.86735e-28	0.432077	0.902	0.787	3.87139e-24
AT1G29910	5.84206e-27	0.514921	0.828	0.659	1.21118e-22
AT1G29920	1.92244e-26	0.393785	0.904	0.748	3.98561e-22
AT3G54890	2.21597e-25	0.432095	0.847	0.723	4.59415e-21
AT1G67090	4.42995e-25	0.350934	0.986	0.911	9.18418e-21
AT3G47470	7.77511e-23	0.434084	0.852	0.723	1.61194e-18
AT4G02770	9.45887e-23	0.522309	0.7	0.541	1.96101e-18
AT5G54270	2.5657e-22	0.400148	0.852	0.702	5.3192e-18
AT4G28750	4.1872e-22	0.471626	0.742	0.584	8.6809e-18
AT1G20340	9.14395e-21	0.433209	0.756	0.613	1.89572e-16
AT1G15820	2.38525e-20	0.449836	0.75	0.603	4.94511e-16
AT1G31330	1.20721e-19	0.448846	0.777	0.647	2.50279e-15
AT5G38420	1.25575e-19	0.438505	0.716	0.536	2.60342e-15
AT1G08380	1.69817e-19	0.440131	0.776	0.645	3.52065e-15
AT1G29930	1.71648e-19	0.344264	0.913	0.806	3.55861e-15
AT1G06680	2.51416e-19	0.441918	0.763	0.646	5.21235e-15
AT1G55670	4.94186e-19	0.453194	0.707	0.544	1.02455e-14
AT2G05100	6.65696e-19	0.448795	0.742	0.607	1.38012e-14
AT3G61470	2.36769e-18	0.448677	0.715	0.58	4.90869e-14
AT2G05070	8.31602e-18	0.509817	0.669	0.515	1.72408e-13
AT1G61520	1.83975e-16	0.407843	0.752	0.63	3.81416e-12
AT2G30570	6.93724e-16	0.382542	0.769	0.639	1.43823e-11
AT3G01500	1.52517e-15	0.501701	0.559	0.411	3.16198e-11
AT4G10340	3.22729e-15	0.378305	0.746	0.632	6.69081e-11
AT1G44575	1.53437e-14	0.516556	0.488	0.346	3.18106e-10
AT2G39730	5.44e-14	0.365644	0.782	0.663	1.12782e-09
AT3G27690	1.70555e-13	0.50343	0.521	0.384	3.53594e-09
AT1G30380	3.5592e-13	0.469654	0.602	0.477	7.37893e-09
AT5G66570	6.88483e-13	0.327951	0.727	0.604	1.42736e-08
AT3G08940	1.08163e-12	0.494549	0.52	0.389	2.24244e-08
AT4G38970	6.00617e-12	0.384354	0.605	0.473	1.2452e-07
AT4G21280	2.38389e-11	0.503193	0.393	0.27	4.94229e-07
AT4G05180	3.47003e-11	0.443815	0.502	0.369	7.19408e-07
AT5G14740	4.20006e-11	0.367216	0.539	0.401	8.70756e-07
AT1G12900	4.22213e-11	0.471528	0.459	0.335	8.75331e-07
AT4G01150	5.67972e-11	0.485249	0.498	0.384	1.17752e-06
AT5G64040	5.71883e-11	0.317512	0.639	0.52	1.18563e-06
AT1G51400	2.05384e-10	0.455183	0.46	0.342	4.25803e-06
AT1G52230	5.21358e-10	0.414595	0.554	0.444	1.08088e-05
AT3G56940	7.73952e-10	0.498234	0.396	0.286	1.60456e-05
AT3G62410	8.47958e-10	0.73187	0.161	0.088	1.75799e-05
AT1G03130	9.72574e-10	0.427098	0.465	0.352	2.01634e-05
AT1G60950	2.29188e-09	0.378916	0.513	0.409	4.75153e-05
AT2G46820	3.17223e-09	0.432131	0.476	0.366	6.57667e-05
AT5G01530	4.06966e-09	0.331064	0.615	0.503	8.43722e-05
AT5G54770	5.30372e-09	0.442339	0.501	0.395	0.000109957
AT1G67740	7.76166e-09	0.439258	0.459	0.356	0.000160915
AT4G12800	1.26114e-08	0.379469	0.566	0.473	0.000261461
AT3G47070	1.40766e-08	0.448323	0.406	0.303	0.000291836
AT3G21055	1.44351e-08	0.375859	0.533	0.431	0.000299268
AT2G06520	4.23366e-08	0.306607	0.613	0.516	0.000877722
AT2G34430	5.37752e-08	0.283292	0.567	0.445	0.00111487
AT5G38430	1.27272e-07	0.338917	0.468	0.361	0.0026386
AT5G42530	1.6018e-07	0.742863	0.164	0.099	0.00332086
AT4G26530	5.68364e-07	0.424208	0.176	0.109	0.0117833
AT1G09340	7.0579e-07	0.421143	0.271	0.189	0.0146324

## Sheet: Cluster 3
	p_val	avg_log2FC	pct.1	pct.2	p_val_adj
AT2G19800	6.45954e-113	2.9274	0.183	0.01	1.33919e-108
AT1G75750	7.4237e-109	2.48375	0.339	0.059	1.53908e-104
AT4G35770	9.6675e-71	2.52355	0.208	0.033	2.00427e-66
AT3G30775	3.52786e-66	2.26371	0.129	0.011	7.31397e-62
AT2G05380	3.57214e-64	1.31611	0.45	0.16	7.40576e-60
AT5G20250	3.78957e-61	2.33563	0.213	0.041	7.85653e-57
AT3G22120	4.02214e-60	2.41124	0.163	0.023	8.33869e-56
AT3G47340	7.05077e-57	2.4529	0.151	0.021	1.46176e-52
AT4G30270	6.73611e-50	2.13913	0.173	0.033	1.39653e-45
AT3G15450	1.71717e-40	1.85175	0.274	0.095	3.56005e-36
AT4G02380	1.13145e-38	1.75714	0.218	0.065	2.34572e-34
AT1G62510	3.51386e-36	1.66127	0.234	0.075	7.28493e-32
AT2G45180	3.43986e-34	1.01833	0.553	0.322	7.13152e-30
AT1G72610	2.74832e-30	1.45665	0.309	0.137	5.69782e-26
AT1G29920	6.88111e-30	0.583465	0.904	0.753	1.42659e-25
AT2G34430	2.94946e-26	0.678388	0.661	0.436	6.11481e-22
AT1G37130	3.76628e-26	1.33466	0.232	0.09	7.80826e-22
AT4G36850	3.05434e-21	1.34537	0.126	0.038	6.33225e-17
AT1G29930	1.42859e-20	0.414107	0.921	0.809	2.96175e-16
AT5G38430	1.0025e-19	0.704187	0.538	0.355	2.07838e-15
AT3G48360	2.28597e-18	1.49066	0.139	0.05	4.73926e-14
AT5G20230	7.12052e-14	1.35845	0.156	0.07	1.47623e-09
AT4G02520	1.80308e-13	1.46037	0.136	0.058	3.73814e-09
AT2G15890	3.40012e-13	1.46531	0.124	0.051	7.04913e-09
AT5G65010	3.13246e-12	1.26379	0.104	0.04	6.49421e-08
AT1G67090	7.28637e-12	0.268074	0.987	0.914	1.51061e-07
AT2G26500	1.72551e-11	0.618536	0.486	0.355	3.57732e-07
AT2G39730	2.59839e-11	0.31152	0.803	0.664	5.38698e-07
AT2G13360	3.01462e-11	0.701703	0.375	0.251	6.24991e-07
AT1G79040	6.20239e-11	0.260846	0.897	0.791	1.28588e-06
AT2G05100	1.32941e-10	0.321795	0.755	0.61	2.75614e-06
AT2G30570	1.87037e-10	0.32421	0.783	0.641	3.87765e-06
AT2G25080	1.61573e-09	0.651155	0.276	0.175	3.34973e-05
AT3G47470	9.18387e-09	0.266871	0.834	0.73	0.0001904
AT2G20670	1.78864e-08	0.95812	0.2	0.123	0.00037082
AT3G26650	2.0942e-08	0.473952	0.476	0.364	0.000434169
AT4G25050	5.64251e-08	0.723167	0.277	0.191	0.0011698
AT5G22920	9.63958e-08	1.36394	0.108	0.054	0.00199848
AT2G25450	5.29302e-07	0.52632	0.193	0.118	0.0109735
AT1G76080	5.91478e-07	0.813264	0.188	0.12	0.0122625
AT4G20360	6.20721e-07	0.654304	0.213	0.138	0.0128688
AT1G71030	1.17068e-06	0.99189	0.134	0.078	0.0242705

## Sheet: Cluster 4
	p_val	avg_log2FC	pct.1	pct.2	p_val_adj
AT2G38540	0	3.72742	0.903	0.19	0
AT1G09310	0	3.70941	0.788	0.146	0
AT4G23670	3.29e-258	3.26449	0.723	0.145	6.81e-254
AT4G38770	1.81e-246	3.64715	0.588	0.087	3.75e-242
AT2G05520	2.1e-245	3.66794	0.717	0.159	4.35e-241
AT4G21960	3.66e-174	2.95003	0.583	0.132	7.59e-170
AT2G32690	1.39e-157	3.17208	0.419	0.064	2.88e-153
AT3G16370	5.02e-152	3.23308	0.353	0.043	1.04e-147
AT5G36910	1.71e-148	3.28886	0.371	0.051	3.54e-144
AT3G26450	4.18e-113	2.79143	0.339	0.058	8.67e-109
AT4G37800	7.21e-106	3.0118	0.279	0.039	1.49e-101
AT1G66100	5.79e-105	3.19531	0.311	0.052	1.2e-100
AT3G51600	1.37e-102	3.09876	0.314	0.054	2.83e-98
AT3G16420	1.4e-102	3.34889	0.239	0.028	2.91e-98
AT2G27385	2.86e-93	2.82432	0.274	0.044	5.93e-89
AT1G68530	4.51e-92	2.78549	0.246	0.035	9.35e-88
AT1G70890	7.6e-91	3.18682	0.231	0.031	1.58e-86
AT5G25610	9.25e-91	2.8182	0.297	0.055	1.92e-86
AT1G70830	6.8e-86	3.27998	0.157	0.012	1.41e-81
AT4G16980	8.3e-82	2.31681	0.435	0.135	1.72e-77
AT1G27950	2.03e-80	2.58418	0.258	0.046	4.22e-76
AT1G45201	1.24e-79	2.68271	0.219	0.031	2.58e-75
AT5G64770	3.91e-77	2.54156	0.323	0.078	8.1e-73
AT2G15970	9.21e-77	2.72453	0.29	0.063	1.91e-72
AT3G26520	6.64e-75	2.28654	0.389	0.116	1.38e-70
AT2G05540	1.63e-72	2.90253	0.212	0.033	3.38e-68
AT4G39330	7.78e-71	2.65856	0.214	0.035	1.61e-66
AT1G25275	3.42e-69	2.12144	0.314	0.078	7.08e-65
AT1G29670	5.8e-67	2.35698	0.237	0.046	1.2e-62
AT4G21620	7.87e-67	2.63599	0.184	0.026	1.63e-62
AT4G12880	2.34e-57	2.37388	0.159	0.023	4.86e-53
AT4G23680	2.42e-57	2.638	0.104	0.008	5.01e-53
AT1G05850	5.85e-56	2.27647	0.295	0.086	1.21e-51
AT2G15050	1.47e-53	1.75871	0.281	0.076	3.06e-49
AT3G09260	5.36e-53	2.70975	0.106	0.009	1.11e-48
AT3G43720	5.28e-50	2.38694	0.171	0.032	1.09e-45
AT4G00360	5.2e-49	2.14802	0.178	0.035	1.08e-44
AT2G45180	6e-49	1.4402	0.595	0.318	1.24e-44
AT2G06850	6.46e-48	3.30845	0.161	0.029	1.34e-43
AT1G13930	4.55e-47	1.57071	0.412	0.167	9.42e-43
AT2G26250	6.58e-47	2.14044	0.203	0.048	1.36e-42
AT3G16570	2.57e-46	2.26128	0.18	0.038	5.33e-42
AT1G55330	3.56e-46	2.03027	0.223	0.057	7.39e-42
AT1G29660	1.23e-45	2.16553	0.191	0.043	2.55e-41
AT1G78850	1.51e-45	1.99056	0.228	0.06	3.13e-41
AT3G16400	1.78e-43	2.33683	0.118	0.016	3.69e-39
AT5G23820	2.19e-43	2.06579	0.102	0.012	4.55e-39
AT3G23810	7.62e-43	2.15568	0.184	0.043	1.58e-38
AT4G11211	3.08e-42	2.2832	0.173	0.038	6.39e-38
AT3G16240	3.16e-41	1.73647	0.353	0.143	6.56e-37
AT4G39730	1.89e-40	2.11032	0.208	0.057	3.92e-36
AT4G35100	2.26e-40	2.13819	0.21	0.058	4.69e-36
AT3G44310	1.06e-36	1.49843	0.39	0.18	2.19e-32
AT5G44020	1.93e-36	1.96097	0.18	0.047	4e-32
AT2G45960	4.03e-35	1.49725	0.359	0.158	8.35e-31
AT3G53420	2.07e-34	1.51861	0.369	0.173	4.29e-30
AT2G40610	2.34e-34	1.85648	0.173	0.046	4.84e-30
AT5G03760	2.41e-33	2.279	0.157	0.04	5e-29
AT4G04840	4.39e-33	1.92636	0.154	0.037	9.09e-29
AT1G62380	5.83e-33	1.78322	0.205	0.064	1.21e-28
AT1G55260	2.31e-30	2.07479	0.129	0.03	4.79e-26
AT4G17340	6.4e-30	1.9236	0.155	0.042	1.33e-25
AT5G66040	8.96e-30	1.71167	0.184	0.057	1.86e-25
AT1G51500	1.08e-26	1.89153	0.133	0.035	2.24e-22
AT4G13840	1.57e-26	1.68332	0.104	0.022	3.26e-22
AT1G04250	1.58e-25	1.84745	0.108	0.024	3.29e-21
AT3G16640	5.25e-25	1.05684	0.44	0.253	1.09e-20
AT1G74670	8.93e-25	1.57027	0.247	0.103	1.85e-20
AT5G11740	1.18e-24	1.33764	0.292	0.136	2.44e-20
AT5G63180	1.28e-24	1.76393	0.118	0.03	2.65e-20
AT1G78040	2.06e-24	1.47087	0.249	0.107	4.28e-20
AT4G09890	3.96e-24	1.72313	0.113	0.028	8.21e-20
AT5G55620	4.38e-24	2.01102	0.11	0.027	9.08e-20
AT3G23820	4.42e-23	1.80729	0.164	0.057	9.17e-19
AT5G25460	8.38e-23	1.77479	0.136	0.041	1.74e-18
AT1G76180	2.32e-22	1.05788	0.398	0.226	4.81e-18
AT1G58270	1.26e-21	1.77416	0.118	0.033	2.62e-17
AT1G20620	2.02e-21	1.37287	0.2	0.079	4.2e-17
AT4G36500	2.88e-21	1.37979	0.194	0.075	5.97e-17
AT1G05010	6.8e-21	1.68379	0.141	0.047	1.41e-16
AT5G54585	8.87e-20	1.82599	0.125	0.039	1.84e-15
AT4G22690	9.46e-20	1.69229	0.154	0.056	1.96e-15
AT1G54410	9.65e-20	0.425527	0.336	0.174	2e-15
AT2G41475	5.41e-19	1.87592	0.11	0.032	1.12e-14
AT3G23050	2.87e-18	1.55146	0.173	0.07	5.96e-14
AT2G47730	3.84e-18	1.24091	0.276	0.141	7.95e-14
AT1G21130	1.39e-17	1.44001	0.148	0.055	2.89e-13
AT4G23400	4.9e-17	1.56718	0.15	0.058	1.02e-12
AT2G39010	5.1e-17	1.34936	0.226	0.11	1.06e-12
AT4G02520	6.59e-17	1.11235	0.15	0.056	1.37e-12
AT1G80440	7.31e-17	1.33523	0.201	0.092	1.51e-12
AT2G14890	9.58e-17	1.54157	0.111	0.036	1.99e-12
AT4G14560	3.53e-16	1.41562	0.129	0.047	7.31e-12
AT1G71695	5.92e-16	1.7525	0.125	0.046	1.23e-11
AT4G14550	5.98e-16	1.35743	0.127	0.046	1.24e-11
AT1G19570	9.06e-16	1.35607	0.154	0.063	1.88e-11
AT1G72150	2.7e-15	1.06818	0.253	0.134	5.6e-11
AT4G27520	2.8e-15	1.18231	0.219	0.109	5.81e-11
AT5G19240	3.16e-15	0.998604	0.23	0.114	6.56e-11
AT5G38980	3.17e-15	1.30646	0.191	0.089	6.57e-11
AT1G22710	9.28e-15	1.32136	0.11	0.038	1.92e-10
AT5G19250	1.11e-14	1.45647	0.134	0.053	2.3e-10
AT5G20650	1.74e-14	1.34434	0.118	0.044	3.6e-10
AT3G20820	3.15e-14	1.65112	0.122	0.047	6.52e-10
AT3G61430	3.25e-14	1.24033	0.18	0.084	6.73e-10
AT2G05380	5.49e-14	1.90755	0.299	0.182	1.14e-09
AT4G30270	3.3e-13	1.17839	0.113	0.042	6.83e-09
AT3G62290	3.86e-13	1.22872	0.18	0.087	8e-09
AT2G41430	5.79e-13	0.585769	0.44	0.289	1.2e-08
AT1G78460	6.01e-13	1.49547	0.11	0.041	1.25e-08
AT3G18490	7.18e-13	1.46547	0.131	0.055	1.49e-08
AT1G78820	7.26e-13	1.46148	0.104	0.039	1.5e-08
AT3G09390	1.61e-12	0.828784	0.327	0.204	3.33e-08
AT5G21090	2.32e-12	1.49603	0.134	0.059	4.82e-08
AT5G20700	3.14e-12	1.2363	0.186	0.095	6.5e-08
AT5G01750	3.33e-12	1.03177	0.2	0.104	6.9e-08
AT1G32920	1.54e-11	0.91852	0.307	0.196	3.19e-07
AT3G17390	1.73e-11	1.35592	0.141	0.066	3.59e-07
AT1G05135	1.8e-11	1.08915	0.106	0.042	3.74e-07
AT1G69530	6.07e-11	1.22928	0.161	0.081	1.26e-06
AT1G56280	9.65e-11	1.05311	0.18	0.095	2e-06
AT4G29350	1.3e-10	0.827097	0.219	0.124	2.69e-06
AT5G22270	2.59e-10	1.36804	0.106	0.045	5.36e-06
AT5G02500	3.01e-10	0.887434	0.196	0.107	6.25e-06
AT5G39570	3.73e-10	1.22331	0.133	0.063	7.73e-06
AT4G39800	4.43e-10	1.08558	0.175	0.093	9.19e-06
AT1G08200	4.83e-10	1.18214	0.124	0.057	1e-05
AT1G31580	5.97e-10	0.777731	0.279	0.175	1.24e-05
AT4G38680	1.28e-09	1.15549	0.113	0.051	2.66e-05
AT1G07135	1.35e-09	1.33351	0.141	0.072	2.81e-05
AT1G78830	1.93e-09	1.14173	0.159	0.085	4e-05
AT1G07890	2.65e-09	0.827237	0.208	0.121	5.5e-05
AT1G19910	2.72e-09	1.10759	0.157	0.084	5.63e-05
AT5G06320	2.77e-09	1.21559	0.145	0.074	5.75e-05
AT2G23810	3.63e-09	1.1166	0.15	0.079	7.53e-05
AT2G03680	9.04e-09	1.08663	0.102	0.046	0.00018743
AT1G11840	1.28e-08	1.19876	0.138	0.072	0.00026517
AT5G49720	1.68e-08	1.09157	0.106	0.05	0.00034747
AT3G12120	1.91e-08	0.829716	0.157	0.086	0.00039523
AT1G70490	5.27e-08	0.971064	0.134	0.071	0.0010918
AT1G66240	6.39e-08	0.968671	0.141	0.077	0.00132422
AT1G75750	7.16e-08	1.04021	0.154	0.086	0.00148417
AT1G31812	8.86e-08	0.351849	0.231	0.146	0.00183582
AT1G23390	1.4e-07	0.962009	0.164	0.096	0.0029081
AT3G23030	1.49e-07	1.15998	0.12	0.063	0.00308227
AT4G01950	1.86e-07	0.974609	0.117	0.059	0.00384738
AT2G23090	3.2e-07	0.838321	0.168	0.1	0.00664159
AT1G20440	5.72e-07	0.550174	0.26	0.173	0.0118678
AT3G51730	5.89e-07	1.0165	0.117	0.062	0.0122009
AT3G13520	8.25e-07	0.844591	0.127	0.07	0.0171133
AT4G26710	9.18e-07	0.731421	0.106	0.054	0.0190387
AT3G16770	1.13e-06	0.940039	0.117	0.063	0.0234147
AT2G30870	2.02e-06	0.969762	0.106	0.056	0.0418704
AT3G51920	2.15e-06	0.814615	0.175	0.11	0.0446122
AT5G62350	2.22e-06	1.19004	0.108	0.058	0.0459683
AT5G09810	2.29e-06	1.07452	0.134	0.079	0.0475259

## Sheet: Cluster 5
	p_val	avg_log2FC	pct.1	pct.2	p_val_adj
AT1G79245	1.8e-230	3.69743	0.586	0.088	3.73e-226
AT1G56660	2.74e-155	3.87349	0.561	0.135	5.68e-151
AT3G41768	1.95e-121	2.22016	0.847	0.462	4.05e-117
AT3G50950	7.06e-119	3.09318	0.375	0.065	1.46e-114
AT2G16586	4.13e-106	2.50041	0.48	0.124	8.56e-102
AT4G34410	6.91e-104	2.91721	0.381	0.079	1.43e-99
AT5G41790	2.82e-103	2.93464	0.34	0.061	5.84e-99
AT1G59910	8.35e-100	3.09627	0.264	0.035	1.73e-95
AT1G20450	3.43e-98	2.35803	0.499	0.148	7.1e-94
AT5G63320	6.54e-98	3.19284	0.293	0.047	1.36e-93
AT1G59870	1.38e-96	2.92626	0.32	0.058	2.87e-92
AT4G19520	1.79e-96	3.30737	0.27	0.039	3.7e-92
AT1G27770	1.67e-95	3.23723	0.289	0.047	3.47e-91
AT1G17420	2.18e-95	3.12702	0.287	0.046	4.53e-91
AT5G40340	5.94e-86	2.81736	0.322	0.066	1.23e-81
AT4G23180	5.04e-79	2.76384	0.289	0.057	1.04e-74
AT4G02510	3.35e-78	2.73934	0.27	0.049	6.94e-74
AT4G16860	9.84e-77	2.88321	0.258	0.046	2.04e-72
AT3G54500	2.81e-72	2.44558	0.34	0.087	5.83e-68
AT4G29780	5.3e-72	2.77735	0.28	0.058	1.1e-67
AT1G18300	3.59e-71	2.44429	0.299	0.068	7.44e-67
AT1G60200	3.89e-71	2.61358	0.268	0.053	8.07e-67
AT4G28080	3.08e-70	2.69205	0.363	0.104	6.38e-66
AT1G72520	1.17e-68	2.56377	0.299	0.069	2.43e-64
AT4G20830	1.98e-67	3.32494	0.256	0.053	4.1e-63
AT1G76810	2.26e-64	2.50438	0.28	0.065	4.68e-60
AT1G31540	1.54e-63	2.90263	0.231	0.045	3.19e-59
AT1G20440	4.23e-62	1.97059	0.431	0.154	8.78e-58
AT2G14080	1.18e-61	2.74121	0.192	0.031	2.45e-57
AT1G61890	1.02e-60	2.277	0.28	0.067	2.11e-56
AT1G56510	1.81e-59	2.81898	0.229	0.047	3.76e-55
AT1G21580	8.44e-58	2.64007	0.186	0.031	1.75e-53
AT2G01008	6.96e-55	1.94357	0.373	0.123	1.44e-50
AT3G07780	8.53e-51	2.4053	0.2	0.041	1.77e-46
AT4G36520	1.8e-50	2.36856	0.19	0.037	3.73e-46
AT1G55860	1.84e-50	2.31177	0.146	0.021	3.82e-46
AT5G67320	2.11e-50	3.07064	0.196	0.04	4.37e-46
AT1G24330	5.27e-50	2.41104	0.12	0.013	1.09e-45
AT2G33435	2.23e-47	2.4346	0.157	0.027	4.62e-43
AT5G67300	5.83e-47	2.56809	0.229	0.058	1.21e-42
AT1G73540	8.63e-47	1.86232	0.344	0.12	1.79e-42
AT3G55980	1.54e-46	2.00147	0.301	0.096	3.19e-42
AT5G41740	3.58e-46	2.63922	0.14	0.021	7.43e-42
AT5G58120	5.12e-45	2.43535	0.159	0.029	1.06e-40
AT1G19720	8.47e-45	2.47258	0.181	0.038	1.76e-40
AT5G14565	2.37e-44	2.73672	0.155	0.028	4.91e-40
AT3G02260	3.6e-44	2.31298	0.153	0.027	7.46e-40
AT4G38550	1.01e-41	2.39502	0.196	0.047	2.09e-37
AT2G42760	1.77e-41	2.65189	0.148	0.027	3.66e-37
AT3G19240	1.59e-38	2.40783	0.153	0.031	3.3e-34
AT3G57530	2.74e-38	2.13898	0.216	0.061	5.69e-34
AT5G41750	8.1e-38	2.53651	0.113	0.017	1.68e-33
AT4G24570	1.13e-37	1.82945	0.317	0.121	2.34e-33
AT2G24600	1.72e-37	2.34002	0.161	0.036	3.56e-33
AT1G63860	2.3e-37	2.37101	0.132	0.024	4.77e-33
AT2G03140	2.34e-37	2.28934	0.115	0.018	4.85e-33
AT1G60190	2.96e-37	2.55617	0.183	0.046	6.14e-33
AT5G63770	3.61e-36	2.57731	0.118	0.02	7.49e-32
AT5G40450	8.99e-36	1.82119	0.245	0.078	1.86e-31
AT5G38150	9.09e-35	2.3154	0.146	0.031	1.88e-30
AT4G13495	1.52e-34	2.08196	0.229	0.073	3.14e-30
AT1G66090	1.97e-34	2.34784	0.171	0.043	4.09e-30
AT1G70620	3.5e-34	2.16488	0.148	0.032	7.25e-30
AT1G20920	4.48e-34	1.96545	0.19	0.052	9.29e-30
AT4G30100	5.78e-34	2.26553	0.107	0.017	1.2e-29
AT4G16870.1	1.06e-33	2.18682	0.12	0.022	2.2e-29
AT1G75310	6.36e-33	1.96336	0.107	0.017	1.32e-28
AT1G58602	1.47e-32	2.07764	0.173	0.046	3.05e-28
AT5G58140	2.01e-32	2.14512	0.206	0.064	4.16e-28
AT5G46510	6.94e-32	2.34321	0.103	0.017	1.44e-27
AT1G01320	3.57e-31	2.12655	0.212	0.068	7.4e-27
AT2G38470	6.02e-31	1.90234	0.21	0.067	1.25e-26
AT4G14760	2.2e-30	2.07041	0.122	0.025	4.56e-26
AT1G32640	6.63e-29	1.9041	0.212	0.072	1.38e-24
AT4G16890	1.59e-28	1.98737	0.138	0.034	3.29e-24
AT2G30500	2.79e-28	2.23521	0.122	0.027	5.78e-24
AT5G46490	1.31e-27	2.04265	0.115	0.024	2.72e-23
AT1G80840	1.35e-27	1.45521	0.247	0.092	2.81e-23
AT3G22380	1.92e-27	1.88878	0.186	0.06	3.97e-23
AT5G42050	2.69e-27	1.74861	0.223	0.081	5.57e-23
AT2G17840	5.05e-27	1.93536	0.157	0.045	1.05e-22
AT5G62570	6.65e-27	2.09518	0.14	0.036	1.38e-22
AT4G16990	2.02e-26	2.29515	0.173	0.055	4.19e-22
AT2G39580	2.99e-26	2.16987	0.115	0.026	6.2e-22
AT5G46470	4.71e-26	1.99459	0.12	0.028	9.76e-22
AT5G67250	3.33e-25	1.89107	0.113	0.026	6.9e-21
AT5G04560	3.49e-25	1.91582	0.113	0.026	7.24e-21
AT2G46020	3.84e-25	1.81258	0.101	0.021	7.95e-21
AT3G06500	3.88e-25	1.99791	0.142	0.039	8.05e-21
AT5G66210	3.98e-25	1.98475	0.142	0.039	8.25e-21
AT5G40910	1.09e-24	1.88806	0.107	0.023	2.25e-20
AT4G17230	3.06e-24	2.00957	0.107	0.024	6.34e-20
AT5G25280	1.51e-23	1.59384	0.212	0.081	3.13e-19
AT3G56410	2.37e-23	2.05389	0.107	0.025	4.92e-19
AT3G14735	3.2e-23	1.68902	0.175	0.058	6.64e-19
AT2G35930	3.59e-23	1.89532	0.148	0.045	7.45e-19
AT5G44800	3.83e-23	1.87751	0.118	0.03	7.94e-19
AT5G58720	7.92e-23	1.9794	0.148	0.045	1.64e-18
AT1G78070	9.04e-23	2.00367	0.167	0.056	1.87e-18
AT5G10550	9.3e-23	2.22962	0.118	0.031	1.93e-18
AT1G80790	1.1e-22	1.96772	0.124	0.034	2.29e-18
AT3G46530	2.02e-22	1.94019	0.142	0.043	4.19e-18
AT3G63500	1.06e-21	2.16361	0.105	0.026	2.19e-17
AT3G26510	1.18e-21	1.67379	0.235	0.101	2.46e-17
AT3G23920	1.37e-21	1.72142	0.194	0.075	2.84e-17
AT5G65630	1.5e-21	1.92838	0.12	0.033	3.11e-17
AT1G48090	1.89e-21	1.72806	0.103	0.025	3.92e-17
AT5G16780	2.84e-21	1.76147	0.109	0.028	5.88e-17
AT5G02810	1.02e-20	1.8967	0.134	0.041	2.11e-16
AT2G22500	1.44e-20	1.87428	0.183	0.069	2.98e-16
AT4G31570	3.11e-20	1.54819	0.105	0.027	6.45e-16
AT2G27080	4.74e-20	1.69599	0.107	0.028	9.84e-16
AT2G28290	5.66e-20	1.8935	0.118	0.034	1.17e-15
AT1G70320	1.06e-19	1.60152	0.103	0.026	2.21e-15
AT3G57930	1.24e-19	2.12065	0.115	0.033	2.57e-15
AT4G19530	1.53e-19	2.02332	0.103	0.027	3.18e-15
AT5G53460	1.59e-19	1.75319	0.173	0.066	3.31e-15
AT4G28400	1.9e-19	1.84151	0.138	0.045	3.94e-15
AT3G25840	2.52e-19	1.80449	0.136	0.044	5.23e-15
AT4G27410	7.12e-19	1.82737	0.144	0.049	1.48e-14
AT1G76180	8.77e-19	0.962273	0.394	0.229	1.82e-14
AT2G01021	1.07e-18	0.997255	0.487	0.317	2.23e-14
AT2G06050	1.41e-18	1.71624	0.111	0.032	2.92e-14
AT4G26630	3.38e-18	1.48963	0.181	0.072	7e-14
AT3G44630	4.01e-18	1.81695	0.115	0.035	8.31e-14
AT2G16940	1.52e-17	1.78968	0.14	0.05	3.15e-13
AT5G56850	1.94e-17	1.8671	0.124	0.041	4.01e-13
AT1G15290	3.53e-17	1.6517	0.111	0.033	7.32e-13
AT2G30020	4.18e-17	1.41692	0.173	0.07	8.67e-13
AT2G23320	7.68e-17	1.70629	0.14	0.051	1.59e-12
AT1G20510	2.7e-16	1.87031	0.126	0.044	5.59e-12
AT1G06410	2.87e-16	1.7581	0.103	0.031	5.95e-12
AT1G78830	3.64e-16	1.7679	0.186	0.083	7.55e-12
AT3G24550	4.44e-16	1.68757	0.105	0.032	9.21e-12
AT1G80930	6.14e-16	1.59614	0.113	0.037	1.27e-11
AT2G26190	7.02e-16	1.50316	0.142	0.053	1.46e-11
AT1G18210	1.36e-15	1.67513	0.14	0.053	2.82e-11
AT4G36980	2.22e-15	1.51233	0.13	0.048	4.6e-11
AT2G40000	5.93e-15	1.15174	0.278	0.152	1.23e-10
AT5G64740	7.45e-15	1.60517	0.15	0.061	1.54e-10
AT5G19140	9.02e-15	1.15851	0.276	0.152	1.87e-10
AT4G01950	1.07e-14	1.48516	0.144	0.057	2.21e-10
AT2G24550	1.27e-14	1.49286	0.171	0.075	2.63e-10
AT1G79280	1.63e-14	1.47053	0.103	0.033	3.38e-10
AT2G18700	2.13e-14	1.65308	0.124	0.046	4.42e-10
AT4G34000	2.62e-14	1.84202	0.124	0.047	5.43e-10
AT5G10695	2.64e-14	1.52896	0.14	0.056	5.48e-10
AT2G29290	6.4e-14	1.53978	0.159	0.07	1.33e-09
AT2G45820	6.74e-14	1.45492	0.181	0.084	1.4e-09
AT5G35170	7.46e-14	1.63368	0.153	0.066	1.55e-09
AT2G41100	1.3e-13	1.47101	0.194	0.094	2.69e-09
AT1G66760	1.96e-13	1.6526	0.13	0.052	4.07e-09
AT5G16730	3.85e-13	1.43291	0.105	0.037	7.98e-09
AT5G44290	1.73e-12	1.41708	0.105	0.038	3.58e-08
AT5G22640	2.11e-12	1.69851	0.124	0.051	4.37e-08
AT4G10060	3.35e-12	1.65474	0.109	0.041	6.95e-08
AT3G45780	3.38e-12	1.53055	0.163	0.078	7.01e-08
AT2G31880	4.82e-12	1.5586	0.136	0.059	9.99e-08
AT1G30360	6.63e-12	1.57173	0.14	0.062	1.38e-07
AT3G17800	1.17e-11	1.3299	0.184	0.094	2.42e-07
AT4G11280	1.32e-11	1.31824	0.163	0.078	2.75e-07
AT1G23710	1.87e-11	1.33713	0.142	0.064	3.87e-07
AT4G27500	2.12e-11	1.44318	0.124	0.053	4.4e-07
AT1G01140	2.57e-11	1.59075	0.146	0.068	5.33e-07
AT5G11090	6.73e-11	1.60742	0.109	0.045	1.39e-06
AT1G76360	1.01e-10	1.65384	0.101	0.04	2.09e-06
AT4G37610	1.89e-10	1.34217	0.148	0.072	3.91e-06
AT1G11260	2.33e-10	1.26144	0.117	0.05	4.82e-06
AT5G55660	3.22e-10	1.43482	0.103	0.042	6.68e-06
AT1G02660	4.46e-10	1.58044	0.12	0.054	9.24e-06
AT3G15730	5.04e-10	1.32958	0.124	0.056	1.05e-05
AT2G44490	8.18e-10	1.3174	0.15	0.075	1.7e-05
AT1G42990	1.04e-09	1.49172	0.105	0.045	2.16e-05
AT5G19240	1.34e-09	0.809683	0.212	0.117	2.77e-05
AT5G65480	1.35e-09	1.21498	0.117	0.052	2.79e-05
AT3G59060	2.61e-09	1.15731	0.188	0.107	5.41e-05
AT5G58200	3.66e-09	1.40589	0.103	0.045	7.58e-05
AT4G23850	8.09e-09	1.31384	0.109	0.049	0.000167655
AT1G51805	1.03e-08	1.33909	0.105	0.047	0.000212593
AT2G41430	1.06e-08	0.576949	0.406	0.295	0.000218949
AT3G25690	2.37e-08	1.49839	0.134	0.07	0.000490601
AT1G66500	6.42e-08	1.32696	0.101	0.047	0.00133045
AT1G32230	1.37e-07	1.35696	0.113	0.057	0.00283374
AT3G04640	2.21e-07	0.967406	0.144	0.078	0.00458846
AT5G59730	2.36e-07	1.20627	0.115	0.058	0.00489302
ATMG00020	3.29e-07	0.377369	0.738	0.711	0.00682739
AT3G13750	4.49e-07	1.18535	0.144	0.081	0.00930826
AT3G46620	5.84e-07	1.13474	0.117	0.061	0.0121034
ATCG00490	8.5e-07	0.358246	0.351	0.255	0.0176323
AT4G34150	8.54e-07	0.879779	0.155	0.09	0.0176974
AT5G19220	8.66e-07	1.11828	0.128	0.07	0.0179504
AT3G52800	1.03e-06	0.935543	0.165	0.099	0.0213711
AT1G70290	1.05e-06	1.23832	0.103	0.052	0.0218019
AT1G55450	1.66e-06	1.04987	0.126	0.07	0.0343901

## Sheet: Cluster 6
	p_val	avg_log2FC	pct.1	pct.2	p_val_adj
AT1G78370	0	5.27167	0.497	0.008	0
AT2G43100	4.8786e-155	4.01754	0.217	0.002	9.60206e-151
AT2G30860	3.67141e-144	4.34727	0.594	0.064	7.22608e-140
AT5G23010	8.606e-126	3.5266	0.211	0.004	1.69383e-121
AT2G46650	8.83533e-125	3.58419	0.229	0.006	1.73897e-120
AT3G54600	8.99496e-121	3.4479	0.217	0.005	1.77039e-116
AT3G19710	1.00045e-117	3.65862	0.16	0.001	1.96908e-113
AT3G11930	3.70145e-114	4.50331	0.217	0.006	7.2852e-110
AT4G13770	8.47649e-113	3.368	0.229	0.007	1.66834e-108
AT5G14200	1.6747e-95	3.21807	0.16	0.003	3.29614e-91
AT5G02380	8.28704e-90	2.58608	0.674	0.135	1.63106e-85
AT4G14040	1.43165e-87	3.29868	0.234	0.012	2.81777e-83
AT3G56240	1.89496e-86	3.66508	0.366	0.036	3.72966e-82
AT3G48740	6.01787e-73	3.50461	0.114	0.002	1.18444e-68
AT5G07460	1.77045e-71	2.74942	0.126	0.003	3.48459e-67
AT1G16410	1.96021e-71	3.35667	0.126	0.003	3.85809e-67
AT2G02130	2.35698e-53	2.96642	0.114	0.004	4.639e-49
AT5G67600	3.65682e-47	2.56952	0.177	0.015	7.19736e-43
AT1G47960	3.9233e-46	3.30029	0.12	0.006	7.72183e-42
AT1G74090	4.77523e-44	2.3086	0.103	0.004	9.39861e-40
AT4G30530	4.07506e-42	2.89682	0.257	0.038	8.02054e-38
AT3G52720	6.63998e-35	2.27358	0.103	0.006	1.30688e-30
AT1G62480	9.78483e-29	2.9443	0.154	0.02	1.92585e-24
AT3G49680	2.11773e-23	2.26731	0.114	0.013	4.16812e-19
AT3G22890	4.4341e-22	2.38961	0.263	0.071	8.72719e-18
AT2G31790	4.44094e-21	1.81781	0.109	0.013	8.74066e-17
AT3G03780	6.29647e-19	2.14422	0.189	0.043	1.23927e-14
AT1G74100	2.85713e-17	1.89139	0.103	0.015	5.62339e-13
AT2G25450	6.42704e-17	1.7007	0.326	0.119	1.26497e-12
AT3G01120	8.94009e-15	1.90046	0.189	0.052	1.75959e-10
AT4G38740	6.58482e-13	1.33731	0.166	0.044	1.29602e-08
AT1G13440	4.41626e-12	1.40232	0.429	0.229	8.69209e-08
AT1G20620	1.94585e-11	1.60964	0.229	0.085	3.82982e-07
AT1G76180	2.4491e-11	1.07922	0.434	0.224	4.82032e-07
AT1G01620	3.40875e-10	1.83012	0.154	0.048	6.70909e-06
AT2G36830	4.47885e-09	1.73505	0.114	0.032	8.81527e-05
AT4G13430	1.03922e-07	1.6466	0.12	0.039	0.00204539
AT5G12140	2.49163e-07	1.02321	0.137	0.048	0.00490402
AT1G19570	2.59378e-07	1.43804	0.166	0.067	0.00510507
AT5G09650	3.5038e-07	1.49808	0.131	0.047	0.00689617
AT5G20290	5.23179e-07	1.11226	0.234	0.113	0.0102972
AT3G20390	7.3992e-07	1.44851	0.114	0.039	0.0145631
AT5G43830	8.65186e-07	1.43713	0.103	0.033	0.0170286
AT1G13930	1.15919e-06	0.965108	0.326	0.187	0.0228152
AT1G20440	1.47949e-06	0.903729	0.286	0.154	0.0291193
AT5G04590	1.97172e-06	1.25448	0.103	0.034	0.0388074

## Sheet: Cluster 7
	p_val	avg_log2FC	pct.1	pct.2	p_val_adj
AT4G00780	0	4.49461	0.5	0.003	0
AT5G18600	0	4.5635	0.473	0.001	0
AT4G14020	0	4.56441	0.505	0.002	0
AT4G19840	0	4.75129	0.577	0.002	0
AT4G38740	0	4.85673	0.659	0.025	0
AT1G65480	0	5.10024	0.44	0.002	0
AT1G67860	0	5.83998	0.654	0.004	0
AT1G67865	0	6.18255	0.643	0.006	0
AT1G67870	0	6.30053	0.813	0.012	0
AT1G64370	0	6.82426	0.808	0.006	0
AT3G15353	0	7.10662	0.89	0.067	0
AT1G23130	0	7.29363	0.78	0.013	0
AT2G32870	5.87411e-299	3.68746	0.363	0.003	1.21782e-294
AT5G04080	1.78669e-288	3.58178	0.335	0.002	3.70417e-284
AT1G54575	1.57797e-287	3.12366	0.286	0	3.27144e-283
AT5G64240	3.47654e-286	3.49334	0.324	0.002	7.20755e-282
AT2G18328	7.4391e-265	3.25546	0.264	0	1.54227e-260
AT3G56240	3.04117e-253	3.72778	0.588	0.029	6.30496e-249
AT5G45350	1.43754e-250	4.23797	0.533	0.023	2.9803e-246
AT2G26695	1.1695e-239	3.02752	0.269	0.002	2.42461e-235
AT5G42980	2.49561e-238	5.95646	0.885	0.11	5.17389e-234
AT4G31380	9.79028e-237	3.23257	0.242	0	2.02972e-232
AT5G22090	1.1269e-228	3.30374	0.308	0.004	2.33629e-224
AT5G02380	1.30913e-217	5.15887	0.89	0.124	2.71408e-213
AT5G57350	8.44529e-215	3.25133	0.291	0.004	1.75088e-210
AT5G12140	4.38255e-212	3.93972	0.56	0.035	9.08589e-208
AT3G03341	4.39398e-208	3.44236	0.242	0.002	9.10961e-204
AT4G16008	3.40874e-203	2.83704	0.214	0.001	7.06701e-199
AT5G62040	7.5084e-203	2.59363	0.203	0	1.55664e-198
AT2G32880	9.81698e-199	2.50457	0.22	0.001	2.03526e-194
AT5G40370	3.7061e-189	3.84213	0.533	0.036	7.68348e-185
AT1G64360	3.28517e-187	3.11975	0.203	0.001	6.81082e-183
AT2G16740	2.66281e-184	2.31056	0.214	0.002	5.52054e-180
AT1G24575	2.16245e-182	2.8066	0.203	0.001	4.4832e-178
AT5G20830	3.70872e-176	2.2728	0.192	0.001	7.68892e-172
AT1G54410	3.83829e-172	4.3809	0.885	0.166	7.95753e-168
AT5G09220	1.36875e-170	3.32528	0.187	0.001	2.83769e-166
AT1G69510	7.13267e-169	3.37439	0.412	0.022	1.47875e-164
AT1G73630	8.94768e-164	1.92334	0.159	0	1.85503e-159
AT3G61210	9.16151e-164	1.93127	0.17	0	1.89936e-159
AT5G59890	2.79606e-160	3.27706	0.418	0.025	5.7968e-156
AT1G31812	1.27333e-155	4.2365	0.78	0.132	2.63986e-151
AT2G21060	6.28753e-150	1.97262	0.209	0.003	1.30353e-145
AT2G47710	1.17081e-149	3.17541	0.462	0.034	2.42733e-145
AT5G63850	6.80476e-147	2.62916	0.154	0	1.41076e-142
AT1G07590	2.08823e-146	4.34478	0.918	0.237	4.32932e-142
AT1G07610	3.52251e-145	2.746	0.264	0.008	7.30287e-141
AT5G17650	1.92768e-136	2.00895	0.148	0.001	3.99647e-132
AT5G27690	3.72841e-127	2.00061	0.148	0.001	7.72974e-123
AT1G69410	2.65914e-125	3.20013	0.324	0.019	5.51292e-121
AT4G00880	1.27852e-124	1.66961	0.132	0	2.65062e-120
AT4G19200	2.18836e-121	3.32087	0.533	0.064	4.53692e-117
AT1G15270	4.09021e-118	3.22101	0.577	0.078	8.47981e-114
AT5G02600	3.656e-112	2.30549	0.17	0.003	7.57962e-108
AT2G41380	6.4921e-111	2.0801	0.154	0.002	1.34594e-106
AT1G76130	1.71937e-110	1.96292	0.143	0.002	3.56461e-106
AT3G01960	9.0887e-108	1.51367	0.104	0	1.88427e-103
AT4G16000	1.23674e-107	1.40403	0.11	0	2.564e-103
AT1G62570	2.7726e-103	1.5818	0.132	0.002	5.74816e-99
AT1G79430	4.63556e-102	1.80372	0.104	0	9.61045e-98
AT2G30540	7.177e-97	1.61749	0.104	0	1.48794e-92
AT1G01470	1.5534e-95	3.03981	0.423	0.049	3.22051e-91
AT4G32690	1.11714e-94	1.69286	0.126	0.002	2.31605e-90
AT1G27530	8.34235e-94	2.28775	0.253	0.015	1.72954e-89
AT4G34870	6.69534e-88	2.59043	0.418	0.05	1.38808e-83
AT2G35635	2.06349e-87	2.50278	0.286	0.022	4.27802e-83
AT2G42680	2.75446e-84	2.33196	0.247	0.017	5.71054e-80
AT1G12880	1.65106e-83	2.32529	0.121	0.002	3.42298e-79
AT1G77710	2.11723e-82	2.48046	0.385	0.045	4.38945e-78
AT3G10860	4.7263e-78	2.46598	0.379	0.047	9.79857e-74
AT1G31340	5.6157e-78	2.23407	0.236	0.017	1.16425e-73
AT4G11600	1.47947e-76	2.36919	0.236	0.017	3.06723e-72
AT1G22710	3.47137e-76	3.02293	0.324	0.035	7.19684e-72
AT5G39340	1.68264e-74	1.85833	0.17	0.008	3.48846e-70
AT5G08170	1.48016e-73	1.56323	0.11	0.002	3.06868e-69
AT3G11280	2.11902e-72	2.17006	0.148	0.006	4.39316e-68
AT2G16600	4.06921e-71	2.25756	0.385	0.053	8.43629e-67
AT5G42300	1.19324e-69	2.66032	0.445	0.075	2.47382e-65
AT3G62950	3.33499e-66	1.86397	0.126	0.004	6.91411e-62
AT2G39850	1.21205e-64	3.56898	0.115	0.003	2.51281e-60
AT2G21660	7.04402e-64	2.20738	0.143	0.006	1.46037e-59
AT2G22190	7.80504e-64	1.75237	0.137	0.006	1.61814e-59
AT5G01750	9.62101e-58	2.39981	0.478	0.101	1.99463e-53
AT5G54940	1.49879e-53	2.21922	0.538	0.139	3.10729e-49
AT5G35680	6.28068e-53	1.72046	0.17	0.013	1.30211e-48
AT4G14710	1.80818e-52	1.90932	0.225	0.024	3.74872e-48
AT5G64350	1.72272e-50	1.91417	0.357	0.062	3.57155e-46
AT3G57870	4.14732e-50	2.41267	0.286	0.041	8.59823e-46
AT5G56150	9.59996e-50	1.76017	0.198	0.019	1.99026e-45
AT4G26840	1.79416e-49	1.72747	0.214	0.023	3.71965e-45
AT1G62180	1.4238e-46	2.16492	0.269	0.039	2.95182e-42
AT1G58360	2.14928e-46	2.08892	0.132	0.009	4.45588e-42
AT2G31200	2.58023e-46	1.8027	0.176	0.016	5.34933e-42
AT4G34710	9.56221e-42	2.37595	0.291	0.051	1.98244e-37
AT1G80300	1.94298e-41	1.63676	0.143	0.012	4.02818e-37
AT5G56600	3.76675e-41	1.67823	0.214	0.028	7.80922e-37
AT2G27960	1.13684e-40	1.49577	0.176	0.019	2.35691e-36
AT5G15320	4.77899e-40	1.76657	0.242	0.036	9.90781e-36
AT4G02940	9.6438e-40	1.59765	0.121	0.009	1.99935e-35
AT1G26550	2.47357e-38	1.81064	0.225	0.033	5.1282e-34
AT4G10040	1.08171e-37	1.95348	0.154	0.016	2.2426e-33
AT4G01897	3.51839e-37	1.11894	0.159	0.017	7.29432e-33
AT5G53550	8.99861e-37	2.12099	0.115	0.009	1.86559e-32
AT4G30010	1.03446e-36	1.92022	0.264	0.047	2.14465e-32
AT5G20010	5.90355e-35	1.90609	0.33	0.074	1.22392e-30
AT1G04410	1.85943e-34	1.62955	0.368	0.09	3.85496e-30
AT5G20020	5.13108e-33	1.72188	0.198	0.03	1.06378e-28
AT4G00860	5.49981e-33	1.72533	0.203	0.031	1.14022e-28
AT2G23090	6.68146e-33	1.69533	0.379	0.097	1.3852e-28
AT1G16890	2.89029e-32	1.59764	0.236	0.043	5.99216e-28
AT4G09030	3.23331e-31	1.07626	0.104	0.008	6.7033e-27
AT2G46390	2.28978e-30	1.50809	0.198	0.032	4.74717e-26
AT3G05880	6.28227e-30	2.0978	0.22	0.04	1.30244e-25
AT3G62400	6.46705e-30	1.58884	0.198	0.032	1.34075e-25
AT5G47890	8.91935e-30	1.40507	0.187	0.029	1.84916e-25
AT5G16470	1.79184e-29	1.35288	0.192	0.031	3.71485e-25
AT4G34700	2.68755e-29	1.47467	0.192	0.031	5.57184e-25
AT2G20820	1.38537e-28	1.53245	0.242	0.049	2.87215e-24
AT2G40765	8.75464e-28	1.59493	0.203	0.037	1.81501e-23
AT1G72020	4.19094e-27	1.69822	0.258	0.058	8.68866e-23
AT5G55160	4.67652e-27	1.10665	0.137	0.018	9.69537e-23
AT1G51650	4.75106e-27	1.35032	0.253	0.055	9.84989e-23
AT4G21105	4.77135e-27	1.55789	0.269	0.062	9.89195e-23
AT5G08680	1.29986e-26	1.66412	0.121	0.014	2.69488e-22
AT2G23120	2.51089e-26	1.60813	0.374	0.114	5.20557e-22
AT3G55440	8.73043e-26	1.3412	0.39	0.12	1.80999e-21
AT1G13440	1.02216e-25	1.43714	0.555	0.226	2.11914e-21
AT2G31490	2.06664e-25	1.25293	0.22	0.045	4.28457e-21
AT4G29350	2.41271e-25	1.40736	0.396	0.125	5.00202e-21
AT5G46020	4.68309e-25	1.5361	0.203	0.04	9.70898e-21
AT1G15120	7.14849e-24	1.45004	0.214	0.045	1.48202e-19
AT3G46000	8.44168e-24	1.34356	0.198	0.04	1.75013e-19
AT5G52840	8.60476e-24	0.943764	0.148	0.023	1.78394e-19
AT2G27450	9.80902e-24	0.750222	0.104	0.012	2.03361e-19
AT3G52300	1.18e-23	1.51637	0.242	0.057	2.44637e-19
AT2G16500	2.90816e-23	1.38564	0.137	0.021	6.0292e-19
AT4G27960	3.2058e-23	1.4978	0.236	0.057	6.64627e-19
AT3G24100	2.06544e-22	1.42434	0.176	0.034	4.28207e-18
AT3G46430	5.90709e-22	1.4956	0.165	0.03	1.22466e-17
AT3G47833	1.01899e-21	0.884945	0.126	0.019	2.11257e-17
AT2G27030	1.32945e-21	1.65006	0.198	0.044	2.75621e-17
AT5G01600	1.76548e-21	1.96601	0.291	0.086	3.6602e-17
AT5G13440	2.14999e-21	0.785319	0.126	0.019	4.45736e-17
AT3G08580	4.26406e-21	1.4205	0.319	0.098	8.84026e-17
AT5G23760	5.25279e-21	0.979564	0.121	0.018	1.08901e-16
AT5G51040	6.9269e-21	1.3188	0.126	0.019	1.43608e-16
AT3G09390	3.31862e-20	1.52553	0.478	0.208	6.88017e-16
AT1G27970	4.45424e-20	1.42319	0.176	0.037	9.23453e-16
AT4G01850	4.94194e-20	1.14413	0.198	0.045	1.02456e-15
AT5G20700	1.24918e-19	1.33107	0.308	0.097	2.58981e-15
AT5G38480	1.60249e-19	1.20224	0.231	0.06	3.32229e-15
AT4G15802	2.12637e-19	1.09398	0.192	0.044	4.40838e-15
AT1G14450	3.81212e-19	1.5676	0.203	0.049	7.90329e-15
AT5G02790	4.41701e-19	1.19749	0.231	0.061	9.15735e-15
AT2G33040	6.13793e-19	1.25678	0.203	0.05	1.27252e-14
AT5G39950	7.5786e-19	1.36556	0.154	0.031	1.5712e-14
AT3G07480	1.7303e-18	1.03966	0.148	0.029	3.58726e-14
AT4G11010	3.68171e-18	1.25591	0.192	0.047	7.63293e-14
AT5G07470	4.29996e-18	1.13853	0.126	0.022	8.91467e-14
AT4G05050	3.95405e-17	1.26504	0.39	0.154	8.19754e-13
AT4G20150	4.08459e-17	1.1563	0.247	0.073	8.46818e-13
AT1G66240	4.82556e-17	1.28424	0.253	0.078	1.00043e-12
AT5G02240	4.84815e-17	1.14495	0.137	0.027	1.00512e-12
AT5G66510	7.38118e-17	0.755149	0.11	0.018	1.53027e-12
AT4G32470	1.3307e-16	0.920466	0.236	0.069	2.75882e-12
AT1G19715	1.5731e-16	0.967217	0.11	0.019	3.26134e-12
AT1G79075	3.03961e-16	0.739421	0.143	0.03	6.30173e-12
AT3G17020	3.45332e-16	1.11374	0.159	0.037	7.15943e-12
AT5G08060	7.16766e-16	1.10516	0.159	0.037	1.486e-11
AT3G48140	7.89261e-16	1.28659	0.22	0.064	1.6363e-11
AT2G47380	1.16983e-15	1.44131	0.165	0.04	2.42529e-11
AT3G27240	1.19568e-15	1.35347	0.115	0.021	2.47888e-11
AT2G21870	1.33079e-15	1.19977	0.192	0.051	2.75899e-11
AT3G52730	4.35295e-15	1.32736	0.154	0.037	9.02453e-11
AT1G29850	5.31254e-15	0.984806	0.148	0.034	1.1014e-10
AT4G37830	8.61834e-15	0.789186	0.269	0.09	1.78675e-10
AT1G67785	1.08499e-14	0.943321	0.148	0.035	2.24941e-10
AT3G52090	1.17273e-14	0.601088	0.11	0.02	2.43131e-10
AT5G08670	1.9379e-14	1.32748	0.148	0.036	4.01765e-10
AT1G53240	3.39591e-14	1.16331	0.187	0.053	7.04041e-10
AT5G47640	4.17007e-14	1.44366	0.165	0.044	8.64538e-10
AT3G03070	5.82913e-14	1.08107	0.165	0.043	1.20849e-09
AT4G01100	7.58948e-14	0.835975	0.121	0.026	1.57345e-09
AT2G01140	8.33155e-14	1.21413	0.11	0.022	1.7273e-09
AT1G08480	2.16449e-13	1.19427	0.126	0.028	4.48743e-09
AT4G05320	2.22606e-13	1.05033	0.44	0.207	4.61507e-09
AT3G29350	2.31391e-13	1.12339	0.104	0.02	4.7972e-09
AT5G59880	2.33599e-13	0.695441	0.258	0.089	4.84297e-09
AT4G16450	2.49641e-13	0.860024	0.154	0.04	5.17555e-09
AT1G14400	4.06571e-13	1.12733	0.143	0.036	8.42903e-09
AT2G19760	4.28701e-13	1.09481	0.154	0.041	8.88782e-09
AT2G47170	4.83795e-13	0.911444	0.181	0.053	1.003e-08
AT1G70490	6.77794e-13	1.08054	0.22	0.073	1.4052e-08
AT1G47420	6.96676e-13	0.753695	0.132	0.031	1.44435e-08
AT5G55190	1.59776e-12	0.659014	0.115	0.026	3.31248e-08
AT5G01350	1.97867e-12	0.615935	0.154	0.042	4.10217e-08
AT1G67350	2.60478e-12	0.69423	0.148	0.039	5.40024e-08
AT5G42850	2.73218e-12	0.845834	0.115	0.026	5.66436e-08
AT4G29480	3.91415e-12	0.799628	0.11	0.024	8.11481e-08
AT1G21770	4.00224e-12	0.705358	0.148	0.04	8.29744e-08
AT4G37180	4.06397e-12	1.0559	0.115	0.027	8.42541e-08
AT4G22220	5.18474e-12	0.735434	0.176	0.052	1.0749e-07
AT3G12490	6.63773e-12	0.418636	0.126	0.031	1.37613e-07
AT1G71950	8.80021e-12	0.672094	0.143	0.039	1.82446e-07
AT1G76200	8.87431e-12	0.836443	0.176	0.053	1.83982e-07
AT2G33220	1.24997e-11	0.645394	0.126	0.031	2.59143e-07
AT3G08610	1.48118e-11	0.892475	0.22	0.077	3.07077e-07
AT3G20390	1.50494e-11	0.697384	0.148	0.041	3.12004e-07
AT1G78020	1.85643e-11	0.55931	0.143	0.039	3.84875e-07
AT2G40880	2.22527e-11	0.858582	0.192	0.064	4.61342e-07
AT1G22840	2.35595e-11	0.809737	0.143	0.04	4.88436e-07
AT1G27450	3.14126e-11	0.964582	0.104	0.023	6.51245e-07
AT3G56490	3.19678e-11	1.01447	0.11	0.026	6.62757e-07
AT5G08290	3.43082e-11	0.521953	0.159	0.047	7.11277e-07
AT5G11770	3.76602e-11	0.758715	0.192	0.064	7.80771e-07
AT4G13615	5.12497e-11	0.715894	0.154	0.045	1.06251e-06
AT5G35970	5.18429e-11	1.00674	0.121	0.031	1.07481e-06
AT3G01280	6.30914e-11	0.879732	0.121	0.031	1.30801e-06
AT2G03680	6.5304e-11	1.0137	0.159	0.049	1.35388e-06
AT3G08590	8.29424e-11	1.10786	0.104	0.024	1.71956e-06
AT5G47570	8.43361e-11	0.55743	0.159	0.048	1.74846e-06
AT1G11840	9.17157e-11	0.877924	0.209	0.075	1.90145e-06
AT5G04750	9.60361e-11	0.898262	0.121	0.031	1.99102e-06
AT5G47030	1.04621e-10	0.78079	0.214	0.078	2.169e-06
AT4G13850	1.08606e-10	0.65938	0.104	0.024	2.25163e-06
AT1G19570	1.0975e-10	0.820475	0.198	0.069	2.27534e-06
AT5G13450	1.1496e-10	0.999795	0.154	0.047	2.38335e-06
AT4G26850	1.77286e-10	1.19561	0.143	0.042	3.67549e-06
AT4G34881	2.05963e-10	0.631214	0.137	0.039	4.27002e-06
AT5G59613	2.28917e-10	0.988402	0.214	0.08	4.74592e-06
AT4G40030	3.13567e-10	0.587142	0.242	0.095	6.50087e-06
AT5G21020	4.76504e-10	0.426366	0.143	0.042	9.87889e-06
AT5G15970	5.18231e-10	1.73843	0.17	0.058	1.0744e-05
AT1G20696	7.02886e-10	0.739556	0.11	0.028	1.45722e-05
AT4G34110	7.14871e-10	1.11294	0.176	0.061	1.48207e-05
AT1G79550	7.68486e-10	0.755932	0.148	0.046	1.59323e-05
AT5G27950	7.95787e-10	1.27243	0.11	0.029	1.64983e-05
AT5G67590	2.86926e-09	0.755264	0.126	0.037	5.94856e-05
AT3G01130	5.08304e-09	0.754768	0.104	0.028	0.000105382
AT3G62790	9.96016e-09	0.565974	0.115	0.033	0.000206494
AT3G51880	1.1462e-08	0.694524	0.126	0.039	0.000237631
AT3G03150	4.2344e-08	0.651653	0.192	0.077	0.000877875
AT1G65290	4.85503e-08	0.536371	0.104	0.03	0.00100654
AT5G10860	6.01037e-08	0.865929	0.11	0.033	0.00124607
AT5G11740	6.52663e-08	0.483995	0.308	0.148	0.0013531
AT1G03610	6.53917e-08	0.817944	0.104	0.031	0.0013557
AT2G30860	7.04796e-08	0.257536	0.209	0.087	0.00146118
AT3G02870	7.84285e-08	0.736749	0.104	0.031	0.00162598
AT1G62380	8.1053e-08	1.14041	0.187	0.076	0.00168039
AT3G52930	8.14424e-08	0.545333	0.148	0.053	0.00168846
AT3G04120	9.27321e-08	0.620577	0.258	0.12	0.00192252
AT2G38230	1.27371e-07	0.578138	0.154	0.056	0.00264066
AT2G02760	1.59742e-07	0.769987	0.11	0.035	0.00331176
AT5G04590	2.08847e-07	0.626463	0.115	0.037	0.00432982
AT5G59910	2.1208e-07	0.421057	0.137	0.049	0.00439684
AT5G19760	2.17439e-07	0.472942	0.187	0.077	0.00450795
AT3G55770	2.51054e-07	0.912643	0.115	0.038	0.00520486
AT3G48690	2.66514e-07	0.679284	0.148	0.056	0.00552538
AT5G64400	2.96555e-07	0.475133	0.242	0.112	0.00614818
AT5G55850	3.22617e-07	0.609875	0.121	0.041	0.0066885
AT5G54680	4.04378e-07	0.792456	0.104	0.033	0.00838356
AT2G44620	4.43685e-07	0.518889	0.126	0.044	0.00919848
AT3G03990	4.88675e-07	0.698413	0.115	0.039	0.0101312
AT5G09810	1.04779e-06	0.403258	0.187	0.081	0.0217227
AT2G21170	1.14397e-06	0.472879	0.225	0.105	0.0237168
AT5G03240	1.16875e-06	0.38352	0.154	0.062	0.0242305
AT1G20450	1.24088e-06	0.440744	0.335	0.179	0.0257259
AT5G03660	2.06085e-06	0.856467	0.104	0.036	0.0427255

## Sheet: Cluster 8
	p_val	avg_log2FC	pct.1	pct.2	p_val_adj
AT1G45191	0	1.17241	0.465	0.005	0
AT2G30424	0	1.20807	0.444	0.006	0
AT1G70520	0	1.24198	0.57	0.012	0
AT4G25830	0	1.30743	0.437	0.005	0
AT4G21750	0	1.30951	0.549	0.013	0
AT5G49760	0	1.4531	0.69	0.013	0
AT5G01240	0	1.45771	0.563	0.009	0
AT4G33220	0	1.47637	0.704	0.02	0
AT5G57780	0	1.50711	0.451	0.005	0
AT2G03530	0	1.51502	0.423	0.003	0
AT3G46540	0	1.52018	0.613	0.012	0
AT4G03560	0	1.52661	0.732	0.024	0
AT5G14410	0	1.53263	0.535	0.011	0
AT3G07010	0	1.53761	0.535	0.01	0
AT5G40380	0	1.55008	0.542	0.007	0
AT2G32010	0	1.56189	0.57	0.01	0
AT3G16720	0	1.57423	0.627	0.015	0
AT3G26932	0	1.58568	0.592	0.009	0
AT5G44005	0	1.58883	0.549	0.012	0
AT2G01420	0	1.58926	0.669	0.018	0
AT1G17140	0	1.61758	0.641	0.014	0
AT1G33610	0	1.62169	0.5	0.009	0
AT5G26770	0	1.63082	0.613	0.015	0
AT1G63830	0	1.63864	0.599	0.016	0
AT1G55260	0	1.68133	0.697	0.021	0
AT1G75500	0	1.69759	0.641	0.018	0
AT1G35612.1	0	1.712	0.577	0.014	0
AT2G22980	0	1.7135	0.599	0.016	0
AT1G01120	0	1.71995	0.655	0.016	0
AT5G60400	0	1.77644	0.641	0.011	0
AT1G76360	0	1.7955	0.789	0.024	0
AT1G71695	0	1.84889	0.789	0.033	0
AT3G52870	0	1.88616	0.739	0.021	0
AT1G35350	0	1.96575	0.648	0.018	0
AT4G00970	0	2.02957	0.585	0.015	0
AT3G45730	0	2.0449	0.634	0.019	0
AT5G45280	0	2.09406	0.613	0.017	0
AT2G15090	0	2.12288	0.542	0.009	0
AT1G13110	0	2.12778	0.704	0.017	0
AT4G18970	0	2.16201	0.662	0.015	0
AT5G45950	0	2.18148	0.697	0.015	0
AT1G51805	0	2.19516	0.831	0.03	0
AT3G20820	0	2.34439	0.782	0.034	0
AT2G18440	0	2.35102	0.81	0.032	0
AT3G62070	0	2.37204	0.662	0.017	0
AT5G22270	0	2.37483	0.761	0.031	0
AT1G29660	0	2.3966	0.859	0.036	0
AT1G25098	0	2.45199	0.718	0.019	0
AT2G26250	0	2.46587	0.866	0.042	0
AT3G10720	0	2.50277	0.782	0.027	0
AT3G50480	0	2.54949	0.669	0.02	0
AT1G29670	0	2.56368	0.894	0.043	0
AT1G33590	0	2.58103	0.817	0.031	0
AT1G78460	0	2.69054	0.81	0.026	0
AT4G36648	0	2.72805	0.88	0.037	0
AT5G62470	0	2.78901	0.817	0.025	0
AT2G26190	0	3.0042	0.88	0.038	0
AT1G66090	0	3.16375	0.838	0.033	0
AT5G54720	0	3.2145	0.859	0.019	0
AT4G01950	0	3.45114	0.93	0.04	0
AT5G63180	1.36e-307	1.77835	0.662	0.022	2.83e-303
AT4G13100	2e-307	1.15359	0.437	0.006	4.14e-303
AT4G04570	5.85e-307	1.61828	0.57	0.015	1.21e-302
AT3G55020	2.04e-305	1.49933	0.641	0.021	4.22e-301
AT1G60270	3.58e-305	1.16609	0.423	0.005	7.43e-301
AT1G27130	1.4e-304	1.91446	0.711	0.026	2.91e-300
AT4G40080	7.04e-303	1.20337	0.38	0.003	1.46e-298
AT4G04750	1.05e-302	0.850056	0.38	0.003	2.17e-298
AT1G33600	1.2e-301	2.29731	0.754	0.032	2.48e-297
AT4G18220	7.11e-301	1.22572	0.458	0.007	1.47e-296
AT1G49430	7.79e-301	0.983299	0.423	0.005	1.62e-296
AT1G22640	1.77e-298	1.98486	0.634	0.021	3.66e-294
AT2G01340	2.19e-298	1.072	0.394	0.004	4.54e-294
AT1G11670	3.32e-297	2.31465	0.521	0.012	6.88e-293
AT1G19330	6.63e-297	1.27941	0.549	0.014	1.38e-292
AT2G38750	4.67e-296	1.6319	0.507	0.011	9.67e-292
AT1G04680	5.55e-296	1.62281	0.57	0.015	1.15e-291
AT1G10560	1.97e-295	1.18179	0.373	0.003	4.08e-291
AT3G29030	1.99e-295	1.61828	0.577	0.016	4.12e-291
AT2G20950	2.2e-294	1.2096	0.514	0.011	4.55e-290
AT5G12940	6.55e-294	1.85719	0.549	0.014	1.36e-289
AT1G04280	6.45e-293	1.22678	0.514	0.012	1.34e-288
AT5G11420	6.56e-293	1.59449	0.655	0.023	1.36e-288
AT3G53960	1.56e-291	1.31746	0.493	0.01	3.24e-287
AT1G69890	3.79e-291	1.62031	0.507	0.011	7.85e-287
AT2G26910	1.18e-290	1.11346	0.57	0.016	2.44e-286
AT5G43760	5.2e-290	1.66839	0.648	0.022	1.08e-285
AT1G66400	5.41e-289	1.67356	0.458	0.008	1.12e-284
AT4G33000	2.73e-287	1.34974	0.486	0.01	5.65e-283
AT4G23250	1.19e-286	1.53868	0.549	0.015	2.46e-282
AT5G47380	4.03e-286	0.932656	0.359	0.003	8.36e-282
AT2G41475	7.35e-286	1.30787	0.648	0.023	1.52e-281
AT1G17147	1.14e-285	1.54437	0.43	0.007	2.36e-281
AT1G07720	4.84e-285	1.34013	0.5	0.011	1e-280
AT4G39640	1.3e-284	1.36185	0.563	0.016	2.7e-280
AT5G12050	2.1e-284	1.77725	0.493	0.011	4.35e-280
AT1G21010	9.57e-284	1.51251	0.585	0.018	1.98e-279
AT4G23190	2.64e-283	1.47227	0.451	0.008	5.48e-279
AT4G33180	7.87e-283	1.04461	0.444	0.008	1.63e-278
AT2G46225	2.44e-282	0.905662	0.359	0.003	5.06e-278
AT1G50740	3.37e-282	1.65952	0.606	0.02	6.99e-278
AT1G19770	7.49e-282	2.50298	0.852	0.048	1.55e-277
AT5G65730	8.48e-282	1.67419	0.585	0.018	1.76e-277
AT1G75710	9.05e-282	1.02582	0.359	0.003	1.88e-277
AT2G39280	8.01e-281	1.26307	0.5	0.012	1.66e-276
AT3G11820	4.13e-280	1.8891	0.641	0.023	8.56e-276
AT4G14550	3.33e-279	2.32511	0.746	0.035	6.9e-275
AT3G23030	2.65e-278	2.35923	0.838	0.046	5.49e-274
AT5G12950	4.04e-278	1.4926	0.507	0.012	8.37e-274
AT1G03220	1.34e-277	2.43168	0.704	0.031	2.78e-273
AT1G51500	9.73e-277	1.28144	0.676	0.027	2.02e-272
AT5G39785	1.26e-276	1.48105	0.563	0.017	2.6e-272
AT1G78850	6.27e-276	2.58185	0.901	0.055	1.3e-271
AT3G49530	4.04e-275	1.46742	0.627	0.023	8.38e-271
AT5G45340	4.57e-275	2.49421	0.627	0.023	9.48e-271
AT1G34640	4.97e-275	1.00023	0.387	0.005	1.03e-270
AT3G44610	5.35e-275	1.31378	0.5	0.012	1.11e-270
AT1G11310	1.45e-274	1.88591	0.592	0.02	3.01e-270
AT4G14560	2.09e-274	2.60351	0.746	0.035	4.33e-270
AT1G13100	2.62e-272	0.811343	0.345	0.003	5.42e-268
AT1G69840	7.3e-272	1.67347	0.57	0.018	1.51e-267
AT5G41810	9.62e-272	1.15346	0.437	0.008	1.99e-267
AT1G08510	2e-271	1.44679	0.69	0.029	4.14e-267
AT1G78820	3.01e-271	1.67338	0.669	0.027	6.24e-267
AT5G66210	5.08e-271	2.11366	0.697	0.031	1.05e-266
AT4G14740	5.34e-271	1.08054	0.514	0.013	1.11e-266
AT1G19380	1.73e-270	1.82453	0.585	0.02	3.58e-266
AT5G15310	3.58e-270	1.29367	0.444	0.009	7.43e-266
AT1G22190	6.67e-270	2.16051	0.81	0.044	1.38e-265
AT2G44230	2.22e-269	1.1999	0.535	0.015	4.6e-265
AT3G05830	1.11e-268	0.807767	0.331	0.003	2.3e-264
AT1G20650	1.79e-268	1.09742	0.563	0.018	3.71e-264
AT5G25440	3.03e-268	1.19909	0.394	0.006	6.28e-264
AT4G25170	1.57e-267	1.60339	0.585	0.02	3.26e-263
AT1G18210	2.31e-267	2.35927	0.775	0.041	4.79e-263
AT5G54710	4.91e-267	1.72247	0.542	0.016	1.02e-262
AT5G57035	7.74e-267	1.02041	0.423	0.007	1.6e-262
AT5G56980	1.78e-266	1.48615	0.577	0.019	3.68e-262
AT3G43720	2.51e-266	1.41304	0.683	0.029	5.2e-262
AT1G11350	2.83e-266	1.11017	0.423	0.007	5.86e-262
AT3G56060	1.61e-265	0.90106	0.38	0.005	3.34e-261
AT2G27385	3.75e-265	2.21793	0.838	0.048	7.78e-261
AT3G59310	8.34e-265	1.24783	0.43	0.008	1.73e-260
AT4G01250	8.57e-265	2.3831	0.662	0.028	1.78e-260
AT1G59590	9.65e-265	1.412	0.444	0.009	2e-260
AT1G69295	2.67e-264	1.14767	0.514	0.014	5.54e-260
AT1G13390	3.3e-264	1.28173	0.606	0.022	6.85e-260
AT5G47370	4.59e-264	1.99145	0.606	0.022	9.53e-260
AT5G14930	2.7e-263	1.54559	0.535	0.016	5.6e-259
AT2G43290	6.05e-263	2.08787	0.718	0.034	1.25e-258
AT4G15630	7.19e-263	1.39636	0.606	0.022	1.49e-258
AT2G01670	1.37e-261	2.39246	0.852	0.052	2.83e-257
AT4G36500	4.58e-260	3.04012	0.915	0.064	9.5e-256
AT2G15050	1.05e-259	2.99307	0.972	0.073	2.18e-255
AT2G32800	2.35e-259	1.30979	0.556	0.018	4.88e-255
AT1G67400	5.33e-259	1.09549	0.331	0.003	1.1e-254
AT1G02120	1.23e-258	1.14964	0.57	0.02	2.55e-254
AT1G05575	2.37e-258	1.55571	0.373	0.005	4.92e-254
AT2G38120	1.51e-257	0.9814	0.423	0.008	3.13e-253
AT2G46710	3.32e-257	0.949802	0.5	0.014	6.89e-253
AT4G25470	1.44e-256	2.10692	0.62	0.025	2.98e-252
AT5G41900	1.55e-255	0.92284	0.345	0.004	3.22e-251
AT1G05135	2.58e-255	1.78012	0.676	0.03	5.35e-251
AT2G22970	2.91e-255	0.971812	0.408	0.007	6.02e-251
AT3G50530	4.96e-255	0.839861	0.415	0.008	1.03e-250
AT4G39840	6.04e-255	1.14087	0.521	0.016	1.25e-250
AT3G45640	1.13e-254	1.8718	0.711	0.035	2.33e-250
AT1G52290	3.26e-254	0.994686	0.352	0.004	6.75e-250
AT5G64660	5.09e-254	1.47536	0.507	0.015	1.05e-249
AT1G56520	7.41e-254	1.15721	0.486	0.013	1.54e-249
AT2G28470	3.2e-253	1.26233	0.535	0.017	6.63e-249
AT5G44680	2.81e-252	2.27764	0.563	0.02	5.84e-248
AT2G30010	4.74e-252	1.03062	0.373	0.006	9.82e-248
AT5G63800	7.06e-252	1.30037	0.592	0.022	1.46e-247
AT1G64390	8.72e-252	1.05177	0.521	0.016	1.81e-247
AT3G04910	1.63e-251	1.56556	0.556	0.019	3.37e-247
AT1G13250	2.83e-251	0.943896	0.387	0.006	5.86e-247
AT1G67900	1.1e-250	1.96096	0.627	0.026	2.27e-246
AT1G54030	1.26e-250	1.01503	0.43	0.009	2.62e-246
AT1G59620	3.54e-250	1.14419	0.444	0.01	7.35e-246
AT1G64710	3.23e-249	1.22687	0.493	0.014	6.71e-245
AT2G16280	4.06e-249	0.949156	0.423	0.009	8.42e-245
AT4G30470	4.44e-249	1.60171	0.563	0.02	9.2e-245
AT5G26920	8.05e-249	1.46398	0.359	0.005	1.67e-244
AT5G40170	1.28e-248	1.07843	0.451	0.011	2.66e-244
AT2G30930	1.74e-248	1.72811	0.62	0.026	3.61e-244
AT5G03380	1.88e-248	1.73493	0.718	0.037	3.9e-244
AT4G28400	6.69e-248	1.82118	0.704	0.036	1.39e-243
AT3G01690	3.97e-247	1.51217	0.739	0.04	8.24e-243
AT1G58270	6.04e-247	1.89835	0.62	0.026	1.25e-242
AT4G37590	3.95e-246	1.08097	0.493	0.014	8.2e-242
AT3G05160	4.04e-246	0.766687	0.331	0.004	8.37e-242
AT3G51950	5.21e-246	1.11256	0.704	0.036	1.08e-241
AT2G23810	5.56e-246	2.47579	0.894	0.063	1.15e-241
AT1G80050	4.05e-245	0.946252	0.317	0.003	8.4e-241
AT1G22910	4.4e-245	0.874888	0.408	0.008	9.13e-241
AT4G31550	9.31e-245	2.02952	0.739	0.041	1.93e-240
AT1G25550	1.03e-244	1.64743	0.81	0.05	2.14e-240
AT3G54810	1.48e-244	1.34327	0.57	0.022	3.07e-240
AT2G31090	2.83e-244	1.38819	0.507	0.016	5.88e-240
AT2G30500	2.93e-244	1.33831	0.57	0.021	6.06e-240
AT1G04240	5.01e-244	1.61607	0.521	0.017	1.04e-239
AT1G09140	6.29e-244	1.14541	0.535	0.018	1.3e-239
AT3G08030	6.71e-244	1.16727	0.655	0.03	1.39e-239
AT3G10930	1.84e-243	2.44899	0.662	0.032	3.81e-239
AT1G11300	2.73e-243	0.86258	0.324	0.003	5.66e-239
AT1G63750	5.3e-243	1.18316	0.521	0.017	1.1e-238
AT2G40610	6.6e-243	2.32082	0.732	0.04	1.37e-238
AT3G48100	8.58e-243	1.2449	0.387	0.007	1.78e-238
AT4G15760	1.08e-242	1.67637	0.782	0.046	2.23e-238
AT1G27100	1.53e-242	1.64589	0.859	0.057	3.18e-238
AT3G18830	1.8e-242	1.98114	0.465	0.012	3.73e-238
AT1G69900	3.52e-242	1.04769	0.352	0.005	7.3e-238
AT4G11830	3.87e-242	1.0214	0.507	0.016	8.03e-238
AT1G53210	4.07e-242	1.80442	0.824	0.052	8.44e-238
AT1G70940	1.36e-241	1.41937	0.648	0.03	2.81e-237
AT2G31880	2.47e-241	1.99795	0.775	0.046	5.13e-237
AT4G09760	3.29e-241	1.2694	0.5	0.015	6.83e-237
AT1G22890	6.56e-241	1.62324	0.563	0.021	1.36e-236
AT1G76160	1.02e-240	0.967288	0.556	0.021	2.12e-236
AT1G72510	3.38e-240	1.6753	0.754	0.043	7.01e-236
AT1G01430	4.81e-240	1.14714	0.57	0.022	9.98e-236
AT5G54585	1.38e-239	2.05903	0.655	0.031	2.87e-235
AT5G66070	1.53e-239	1.78877	0.549	0.02	3.16e-235
AT5G19250	3.84e-239	1.75019	0.739	0.042	7.96e-235
AT2G38790	3.94e-239	1.79224	0.62	0.027	8.17e-235
AT5G43870	4.31e-239	0.937902	0.324	0.004	8.94e-235
AT1G35210	1.15e-238	1.24845	0.366	0.006	2.37e-234
AT5G55620	1.66e-238	1.15927	0.556	0.021	3.45e-234
AT3G18710	1.81e-238	1.32135	0.415	0.009	3.76e-234
AT4G00330	2.94e-238	1.00963	0.479	0.014	6.09e-234
AT3G04210	9.3e-238	1.74898	0.423	0.01	1.93e-233
AT3G61640	3.87e-237	1.72932	0.585	0.024	8.02e-233
AT3G09410	4.5e-237	0.86278	0.345	0.005	9.33e-233
AT5G66650	6.75e-237	1.72099	0.514	0.017	1.4e-232
AT2G26975	9.23e-237	1.18242	0.556	0.021	1.91e-232
AT1G32230	1.88e-236	1.13529	0.739	0.042	3.91e-232
AT2G25250	2.02e-236	1.75056	0.683	0.035	4.18e-232
AT3G26180	2.91e-236	1.17087	0.528	0.019	6.03e-232
AT2G47060	3.79e-236	1.60166	0.563	0.022	7.86e-232
AT3G20310	4.03e-236	1.18261	0.641	0.03	8.35e-232
AT4G32570	6.24e-236	0.877155	0.514	0.017	1.29e-231
AT1G20823	8.21e-236	1.79261	0.486	0.015	1.7e-231
AT3G11720	2e-235	0.745506	0.324	0.004	4.16e-231
AT5G57710	2.32e-235	1.06188	0.648	0.031	4.81e-231
AT1G27950	4.41e-235	1.63269	0.796	0.048	9.14e-231
AT1G66760	7.08e-235	1.83341	0.725	0.04	1.47e-230
AT3G59320	2.43e-234	0.749274	0.296	0.003	5.03e-230
AT4G25960	6.13e-233	0.793209	0.451	0.012	1.27e-228
AT2G44130	8.55e-233	1.90572	0.585	0.025	1.77e-228
AT1G53400	1.17e-232	0.990558	0.507	0.017	2.44e-228
AT5G62100	1.97e-232	0.880499	0.38	0.007	4.08e-228
AT1G11410	2.96e-232	0.722595	0.366	0.006	6.13e-228
AT1G56540	6.66e-232	0.905264	0.38	0.007	1.38e-227
AT4G00360	8.45e-232	1.37935	0.669	0.033	1.75e-227
AT1G29500	9.14e-232	1.8346	0.437	0.011	1.89e-227
AT3G23050	1.41e-231	2.07974	0.852	0.059	2.92e-227
AT3G02880	1.53e-231	1.2141	0.415	0.01	3.17e-227
AT3G53280	1.61e-231	0.79851	0.437	0.011	3.35e-227
AT5G36925	6.28e-231	1.8588	0.394	0.008	1.3e-226
AT4G18030	1.31e-230	0.974356	0.563	0.023	2.71e-226
AT1G07135	1.41e-230	2.72803	0.824	0.057	2.92e-226
AT1G28370	1.93e-230	1.52119	0.599	0.026	4.01e-226
AT1G51700	7.83e-230	2.00146	0.746	0.045	1.62e-225
AT4G25490	1.38e-229	2.02875	0.486	0.016	2.87e-225
AT1G48260	2.19e-229	0.903686	0.296	0.003	4.55e-225
AT5G24620	3.78e-229	1.13701	0.493	0.016	7.83e-225
AT1G70160	4.39e-229	0.952355	0.514	0.018	9.09e-225
AT3G56050	5.93e-229	1.01206	0.521	0.019	1.23e-224
AT5G27860	1.26e-228	1.15076	0.465	0.014	2.6e-224
AT1G21130	1.78e-228	2.14112	0.754	0.046	3.69e-224
AT2G18300	4.09e-227	1.60403	0.697	0.039	8.48e-223
AT2G47630	6.63e-227	0.952487	0.38	0.008	1.37e-222
AT3G52840	1.25e-226	1.13241	0.542	0.021	2.58e-222
AT5G22250	1.55e-226	1.53964	0.493	0.016	3.21e-222
AT5G25610	3.35e-226	1.80939	0.859	0.06	6.95e-222
AT4G24350	4.35e-226	1.16799	0.493	0.017	9.02e-222
AT5G35735	6.48e-226	1.90532	0.592	0.027	1.34e-221
AT4G36540	6.66e-226	1.64418	0.655	0.034	1.38e-221
AT5G52320	7.54e-226	1.16641	0.408	0.01	1.56e-221
AT1G32928	1.81e-225	1.40641	0.754	0.046	3.76e-221
AT1G78070	2.2e-225	1.46302	0.761	0.047	4.57e-221
AT1G26800	9.43e-225	0.934576	0.458	0.014	1.96e-220
AT2G01450	1.43e-224	1.02835	0.577	0.025	2.96e-220
AT4G30210	1.51e-224	1.61968	0.62	0.03	3.13e-220
AT4G30490	1.69e-224	0.894888	0.38	0.008	3.5e-220
AT5G50570	4.73e-224	1.08907	0.324	0.004	9.82e-220
AT3G51830	6.48e-224	0.997515	0.43	0.012	1.34e-219
AT4G23820	8.88e-224	0.964684	0.437	0.012	1.84e-219
AT4G24230	1e-223	1.0522	0.486	0.016	2.08e-219
AT1G18650	1.78e-223	0.948226	0.415	0.01	3.69e-219
AT3G28180	2.14e-223	0.977968	0.606	0.028	4.44e-219
AT2G43010	3.85e-223	1.38392	0.746	0.046	7.98e-219
AT3G07390	1.14e-222	1.37802	0.486	0.017	2.37e-218
AT5G11670	1.46e-222	1.24726	0.493	0.017	3.02e-218
AT1G80650	2.97e-222	1.03606	0.394	0.009	6.17e-218
AT3G24503	3.39e-222	1.30981	0.521	0.02	7.02e-218
AT3G06550	4.79e-222	0.922095	0.38	0.008	9.94e-218
AT4G30350	4.81e-222	1.43767	0.451	0.013	9.97e-218
AT2G45380	5.62e-222	1.02284	0.472	0.015	1.16e-217
AT4G18120	1.02e-221	0.902542	0.415	0.011	2.12e-217
AT3G05200	1.22e-221	0.840419	0.437	0.012	2.52e-217
AT1G35180	1.35e-221	0.731392	0.31	0.004	2.8e-217
AT1G67730	1.53e-221	0.957159	0.444	0.013	3.17e-217
AT5G27420	1.57e-221	1.52289	0.458	0.014	3.25e-217
AT3G62190	9.54e-221	1.17614	0.514	0.019	1.98e-216
AT2G20835	9.94e-221	1.23524	0.317	0.004	2.06e-216
AT5G67180	1.35e-220	0.781044	0.268	0.002	2.8e-216
AT4G16710	1.89e-220	1.15409	0.38	0.008	3.91e-216
AT4G32410	2.02e-220	0.94238	0.648	0.034	4.19e-216
AT4G11360	2.33e-220	0.827142	0.465	0.015	4.83e-216
AT1G26208	3.03e-220	0.874793	0.331	0.005	6.28e-216
AT4G09150	8.34e-220	0.885004	0.521	0.02	1.73e-215
AT5G60800	9.28e-220	0.870092	0.282	0.003	1.92e-215
AT3G15530	1.9e-219	1.14363	0.577	0.026	3.94e-215
AT2G28550	4.1e-219	0.864068	0.472	0.016	8.5e-215
AT1G55450	4.59e-219	2.68589	0.782	0.054	9.52e-215
AT5G04760	1.19e-218	0.997915	0.5	0.018	2.46e-214
AT5G43470	1.53e-218	1.13627	0.549	0.023	3.17e-214
AT5G57150	1.77e-218	0.736511	0.366	0.007	3.66e-214
AT5G23860	3e-218	1.00373	0.415	0.011	6.22e-214
AT1G71697	3.41e-218	1.78562	0.542	0.023	7.07e-214
AT1G20510	3.81e-218	1.92894	0.648	0.035	7.9e-214
AT1G28380	4.7e-218	1.30106	0.521	0.02	9.75e-214
AT1G21590	7.15e-218	0.950728	0.486	0.017	1.48e-213
AT1G17200	7.91e-218	0.747492	0.43	0.012	1.64e-213
AT1G80420	1.41e-217	1.22683	0.507	0.019	2.92e-213
AT1G41830	1.64e-217	1.10065	0.444	0.013	3.4e-213
AT1G78080	1.65e-217	1.43458	0.69	0.04	3.41e-213
AT5G28630	1.98e-217	1.69626	0.465	0.015	4.1e-213
AT1G66180	2.23e-217	1.31535	0.606	0.029	4.62e-213
AT2G30870	2.65e-217	1.34034	0.711	0.043	5.49e-213
AT1G28230	5.69e-217	0.861697	0.324	0.005	1.18e-212
AT4G27500	7.93e-217	1.26473	0.697	0.041	1.64e-212
AT1G25275	2.04e-216	2.69148	0.93	0.081	4.23e-212
AT1G57990	1.09e-215	1.58117	0.592	0.028	2.25e-211
AT2G33580	1.2e-215	1.2395	0.521	0.021	2.49e-211
AT5G22450	2.27e-215	0.822984	0.486	0.017	4.71e-211
AT3G18490	2.46e-215	1.31671	0.718	0.044	5.11e-211
AT5G58720	2.74e-215	1.2824	0.669	0.038	5.68e-211
AT1G23080	2.92e-215	1.14404	0.451	0.014	6.06e-211
AT5G44568	1.37e-214	2.02378	0.38	0.009	2.83e-210
AT1G22360	1.48e-214	0.832969	0.373	0.008	3.08e-210
AT5G06320	4.61e-214	2.23128	0.817	0.06	9.56e-210
AT1G30820	7.14e-214	1.10148	0.38	0.009	1.48e-209
AT1G77060	1.56e-213	1.14531	0.5	0.019	3.22e-209
AT3G06650	3.11e-213	0.814633	0.486	0.018	6.45e-209
AT1G31540	3.51e-213	1.39295	0.718	0.045	7.28e-209
AT1G45010	4.47e-213	0.85052	0.345	0.006	9.27e-209
AT4G32280	5.88e-213	1.78652	0.324	0.005	1.22e-208
AT1G42980	7.68e-213	0.600241	0.232	0.001	1.59e-208
AT3G21070	1.02e-212	2.24257	0.493	0.019	2.11e-208
AT4G37470	2.23e-212	0.942218	0.577	0.027	4.62e-208
AT3G05490	3.17e-212	1.42149	0.521	0.021	6.58e-208
AT3G28080	4.41e-212	1.17423	0.437	0.013	9.14e-208
AT1G54040	6.77e-212	0.698598	0.43	0.013	1.4e-207
AT2G25735	1.09e-211	1.73128	0.57	0.026	2.27e-207
AT4G12040	1.33e-211	1.19464	0.585	0.029	2.76e-207
AT4G12720	1.36e-211	1.87811	0.514	0.021	2.81e-207
AT3G47600	1.38e-211	0.865113	0.282	0.003	2.87e-207
AT2G20630	1.49e-211	0.898587	0.669	0.038	3.09e-207
AT3G49720	1.65e-211	1.04092	0.592	0.029	3.42e-207
AT1G29470	1.93e-211	1.03507	0.585	0.028	4e-207
AT4G08035	2.35e-211	1.12645	0.387	0.01	4.87e-207
AT5G10150	1.31e-210	1.07898	0.437	0.013	2.71e-206
AT5G01750	3.17e-210	2.15531	0.972	0.089	6.57e-206
AT3G13690	3.74e-210	1.09364	0.387	0.01	7.75e-206
AT4G33625	4.44e-210	1.00276	0.394	0.01	9.2e-206
AT5G01100	4.67e-210	1.2176	0.289	0.003	9.68e-206
AT1G22885	5.12e-210	0.947784	0.331	0.006	1.06e-205
AT4G22690	6.51e-210	1.89723	0.725	0.047	1.35e-205
AT5G25540	7.07e-210	0.749868	0.437	0.014	1.47e-205
AT4G23180	7.49e-210	2.53754	0.803	0.06	1.55e-205
AT5G20190	8.44e-210	1.16909	0.592	0.029	1.75e-205
AT1G17145	1.14e-209	0.875911	0.359	0.008	2.36e-205
AT4G25940	5.24e-209	0.817466	0.359	0.008	1.09e-204
AT5G06440	6.58e-209	0.92464	0.415	0.012	1.36e-204
AT5G40390	7.63e-209	0.798144	0.359	0.008	1.58e-204
AT5G62350	9.46e-209	1.28694	0.711	0.045	1.96e-204
AT4G12460	1.6e-208	0.829597	0.366	0.008	3.32e-204
AT3G28910	1.7e-208	0.976917	0.373	0.009	3.52e-204
AT5G02760	3.69e-208	1.90293	0.415	0.012	7.66e-204
AT5G55730	4.01e-208	0.807606	0.408	0.011	8.32e-204
AT2G43160	4.2e-208	0.916092	0.465	0.016	8.71e-204
AT5G05170	9.36e-208	0.899028	0.627	0.034	1.94e-203
AT5G39860	1.15e-207	1.08351	0.373	0.009	2.38e-203
AT5G47230	1.18e-207	1.64008	0.514	0.021	2.45e-203
AT3G15210	1.98e-207	1.96546	0.831	0.064	4.11e-203
AT2G25490	2e-207	1.11936	0.493	0.019	4.15e-203
AT4G32060	2.86e-207	1.62768	0.824	0.062	5.92e-203
AT5G44070	5.23e-207	1.96201	0.5	0.02	1.08e-202
AT4G39330	1.01e-206	0.735745	0.662	0.038	2.1e-202
AT4G27960	1.47e-206	1.25055	0.697	0.044	3.05e-202
AT5G66880	1.66e-206	0.780907	0.373	0.009	3.43e-202
AT3G04640	4.55e-206	2.65051	0.81	0.063	9.43e-202
AT1G47530	4.95e-206	1.13095	0.514	0.022	1.03e-201
AT5G01790	9.05e-206	0.863056	0.437	0.014	1.88e-201
AT2G37710	1.32e-205	0.915232	0.437	0.014	2.74e-201
AT2G31570	1.38e-205	0.781272	0.606	0.032	2.86e-201
AT1G67340	2.73e-205	1.05972	0.493	0.019	5.66e-201
AT4G04890	4.15e-205	0.600949	0.458	0.016	8.6e-201
AT5G44020	4.6e-205	2.42179	0.69	0.043	9.53e-201
AT2G16380	1.1e-204	0.666975	0.296	0.004	2.28e-200
AT1G69530	1.48e-204	2.04377	0.845	0.067	3.07e-200
AT4G17245	2.38e-204	1.10535	0.542	0.024	4.94e-200
AT3G58120	2.87e-204	1.37504	0.387	0.01	5.94e-200
AT4G18205	3.5e-204	1.37506	0.338	0.007	7.26e-200
AT4G28780	5.75e-204	0.774226	0.261	0.002	1.19e-199
AT4G09890	3.74e-203	1.19739	0.528	0.023	7.76e-199
AT5G59730	4.79e-203	1.56508	0.697	0.045	9.94e-199
AT4G11280	6.62e-203	2.17799	0.824	0.065	1.37e-198
AT1G01630	8.48e-203	0.763592	0.472	0.018	1.76e-198
AT4G36360	8.54e-203	0.855853	0.444	0.015	1.77e-198
AT3G25070	9.41e-203	0.904524	0.345	0.007	1.95e-198
AT2G42880	1.1e-202	0.762938	0.472	0.018	2.29e-198
AT2G15042	1.47e-202	0.945644	0.43	0.014	3.04e-198
AT5G18170	2.27e-202	1.23074	0.415	0.013	4.71e-198
AT3G06500	2.94e-202	1.29582	0.613	0.033	6.1e-198
AT3G21690	3.47e-202	0.930171	0.401	0.012	7.19e-198
AT1G26945	5.27e-202	1.27411	0.451	0.016	1.09e-197
AT3G57530	5.62e-202	1.76699	0.775	0.056	1.17e-197
AT5G18650	5.97e-202	0.921195	0.627	0.035	1.24e-197
AT5G25560	1.26e-201	0.768762	0.507	0.021	2.61e-197
AT1G76680	1.73e-201	1.09456	0.521	0.023	3.59e-197
AT3G51080	1.83e-201	0.795903	0.296	0.004	3.8e-197
AT1G75180	1.9e-201	0.92666	0.415	0.013	3.93e-197
AT4G37610	2.11e-201	1.48356	0.789	0.058	4.38e-197
AT5G11610	2.22e-201	0.749669	0.296	0.004	4.59e-197
AT2G41100	5.45e-201	2.6262	0.894	0.081	1.13e-196
AT3G16370	5.96e-201	1.56403	0.796	0.058	1.23e-196
AT1G52830	6.78e-201	1.35474	0.324	0.006	1.4e-196
AT1G18570	8.17e-201	0.736814	0.324	0.006	1.69e-196
AT4G16780	9.87e-201	1.20798	0.401	0.012	2.05e-196
AT1G02660	1.09e-200	1.54273	0.676	0.042	2.27e-196
AT2G03240	1.12e-200	1.1031	0.521	0.023	2.33e-196
AT3G47550	2.46e-200	1.04858	0.373	0.01	5.09e-196
AT1G78830	1.09e-199	1.86825	0.852	0.071	2.25e-195
AT2G22500	1.94e-199	1.93317	0.789	0.06	4.02e-195
AT3G46900	4.15e-199	1.39099	0.43	0.014	8.61e-195
AT1G68490	7.85e-199	1.16572	0.563	0.028	1.63e-194
AT1G08830	9.13e-199	1.05206	0.408	0.013	1.89e-194
AT1G60010	1.02e-198	0.864731	0.451	0.016	2.12e-194
AT5G54145	1.06e-198	1.26303	0.444	0.015	2.2e-194
AT2G39400	1.42e-198	1.42002	0.437	0.015	2.94e-194
AT1G74450	2.06e-198	1.10441	0.613	0.034	4.26e-194
AT4G19200	3.08e-198	1.57145	0.796	0.06	6.38e-194
AT5G08240	4.98e-198	1.0653	0.268	0.003	1.03e-193
AT5G43270	5.9e-198	0.90218	0.387	0.011	1.22e-193
AT5G22780	2.01e-197	0.8404	0.359	0.009	4.18e-193
AT3G46620	3.63e-197	1.76135	0.704	0.048	7.53e-193
AT4G18280	3.75e-197	1.99924	0.542	0.026	7.78e-193
AT1G30360	2.4e-196	1.55226	0.725	0.051	4.98e-192
AT2G26710	2.75e-196	0.853105	0.275	0.003	5.7e-192
AT5G48900	3.59e-196	0.9608	0.387	0.011	7.45e-192
AT5G66030	5.82e-196	0.694083	0.507	0.022	1.21e-191
AT5G04340	7.92e-196	1.7464	0.535	0.026	1.64e-191
AT2G22880	8.47e-196	1.90948	0.437	0.015	1.76e-191
AT1G25400	1.11e-195	1.20689	0.563	0.029	2.3e-191
AT4G09460	2.4e-195	0.745115	0.38	0.01	4.98e-191
AT5G53500	3.67e-195	0.857897	0.324	0.006	7.61e-191
AT4G01090	3.82e-195	0.918013	0.408	0.013	7.91e-191
AT5G66040	4.74e-195	0.952698	0.739	0.051	9.82e-191
AT3G01490	1.11e-194	1.17223	0.458	0.018	2.3e-190
AT4G18210	1.14e-194	0.696561	0.31	0.006	2.36e-190
AT1G71340	1.42e-194	0.992572	0.535	0.026	2.95e-190
AT1G21060	1.5e-194	0.652316	0.296	0.005	3.11e-190
AT5G17350	1.84e-194	1.38228	0.556	0.028	3.81e-190
AT5G25460	1.99e-194	1.3812	0.613	0.035	4.13e-190
AT2G36420	2.07e-194	0.719978	0.296	0.005	4.29e-190
AT1G19960	2.28e-194	0.768574	0.528	0.025	4.72e-190
AT1G20100	2.59e-194	0.953257	0.514	0.023	5.37e-190
AT1G13210	3.31e-194	1.07626	0.373	0.01	6.86e-190
AT4G39090	1.07e-193	1.12457	0.62	0.036	2.21e-189
AT5G61600	2.5e-193	1.69052	0.599	0.034	5.18e-189
AT5G08790	3.24e-193	1.48455	0.613	0.036	6.71e-189
AT2G28630	6.43e-193	1.28857	0.359	0.009	1.33e-188
AT3G52340	1.49e-192	0.936566	0.444	0.016	3.09e-188
AT3G14067	5.6e-192	0.737743	0.62	0.037	1.16e-187
AT5G61270	7.35e-192	1.15438	0.465	0.019	1.52e-187
AT4G34650	7.79e-192	0.809866	0.31	0.006	1.62e-187
AT5G08580	8.29e-192	0.681109	0.289	0.004	1.72e-187
AT3G61190	1.22e-191	1.93508	0.472	0.019	2.53e-187
AT2G39980	1.9e-191	1.26788	0.43	0.015	3.94e-187
AT4G24190	1.92e-191	0.833498	0.458	0.018	3.98e-187
AT5G16210	2.08e-191	0.599629	0.38	0.011	4.32e-187
AT3G59970	2.66e-191	0.824546	0.57	0.03	5.51e-187
AT1G32780	3.19e-191	0.931312	0.211	0.001	6.61e-187
AT1G34340	3.75e-191	0.847754	0.359	0.009	7.78e-187
AT2G46400	4.75e-191	1.26545	0.352	0.009	9.85e-187
AT3G15540	6.55e-191	0.837111	0.366	0.01	1.36e-186
AT4G16990	6.59e-191	0.735188	0.704	0.048	1.37e-186
AT4G32030	6.93e-191	0.97662	0.507	0.023	1.44e-186
AT5G44290	8.85e-191	0.943525	0.563	0.03	1.84e-186
AT1G04040	1.25e-190	1.14226	0.338	0.008	2.6e-186
AT3G45780	1.34e-190	1.39993	0.803	0.065	2.78e-186
AT1G62540	1.83e-190	1.09402	0.352	0.009	3.79e-186
AT2G21830	3.77e-190	0.555548	0.268	0.003	7.82e-186
AT1G23710	4.44e-190	1.58456	0.725	0.052	9.22e-186
AT1G53840	6.08e-190	1.31051	0.577	0.032	1.26e-185
AT5G06860	8.55e-190	1.53124	0.437	0.016	1.77e-185
AT3G28940	2.27e-189	1.41797	0.613	0.036	4.7e-185
AT1G72970	2.84e-189	0.675859	0.324	0.007	5.89e-185
AT1G29440	3.32e-189	1.287	0.338	0.008	6.89e-185
AT5G15350	3.67e-189	1.21269	0.627	0.038	7.6e-185
AT5G24890	4.53e-189	0.882547	0.542	0.028	9.39e-185
AT2G40270	9.07e-189	1.17398	0.493	0.022	1.88e-184
AT5G11090	1.28e-188	1.17003	0.599	0.035	2.66e-184
AT3G50760	1.59e-188	0.806075	0.296	0.005	3.3e-184
AT2G44490	1.69e-188	1.85187	0.775	0.062	3.5e-184
AT5G19230	1.96e-188	1.57081	0.451	0.018	4.07e-184
AT3G09870	2.21e-188	1.03985	0.239	0.002	4.58e-184
AT5G44060	2.83e-188	1.18525	0.465	0.019	5.87e-184
AT2G15970	4.38e-188	1.28245	0.824	0.068	9.08e-184
AT1G64980	4.56e-188	0.849861	0.479	0.021	9.46e-184
AT1G73660	4.78e-188	1.08577	0.542	0.028	9.92e-184
AT4G21570	5.53e-188	1.32682	0.563	0.03	1.15e-183
AT3G52400	6.32e-188	1.61967	0.585	0.033	1.31e-183
AT2G26110	7.06e-188	0.52909	0.359	0.01	1.46e-183
AT1G20190	8.02e-188	1.43731	0.521	0.025	1.66e-183
AT2G24550	1.75e-187	1.32722	0.796	0.064	3.62e-183
AT4G36220	2.31e-187	0.806101	0.444	0.017	4.78e-183
AT3G10640	2.9e-187	0.718879	0.387	0.012	6e-183
AT5G03630	3.67e-187	1.09736	0.458	0.019	7.61e-183
AT3G45970	4.74e-187	1.97337	0.444	0.017	9.82e-183
AT1G61890	5.73e-187	2.88189	0.789	0.068	1.19e-182
AT5G45110	6.27e-187	1.18489	0.5	0.023	1.3e-182
AT5G26030	6.39e-187	1.73507	0.493	0.022	1.32e-182
AT3G58790	8.15e-187	0.550801	0.345	0.009	1.69e-182
AT4G18530	1.08e-186	0.674136	0.246	0.003	2.25e-182
AT4G35480	1.18e-186	1.42983	0.415	0.015	2.45e-182
AT1G05340	1.3e-186	1.68991	0.352	0.009	2.69e-182
AT1G66500	1.31e-186	1.15533	0.606	0.036	2.72e-182
AT1G78240	1.55e-186	0.859498	0.352	0.009	3.22e-182
AT2G37640	2.08e-186	0.790265	0.458	0.018	4.32e-182
AT5G46470	2.34e-186	0.875288	0.507	0.024	4.85e-182
AT1G22330	3.45e-186	0.911133	0.31	0.006	7.15e-182
AT2G03540.1	4.7e-186	0.834858	0.246	0.003	9.74e-182
AT1G67560	6.38e-186	0.773958	0.31	0.006	1.32e-181
AT3G50840	6.83e-186	0.806282	0.352	0.009	1.42e-181
AT1G64200	6.83e-186	0.877935	0.352	0.009	1.42e-181
AT1G72520	7.03e-186	2.77526	0.81	0.072	1.46e-181
AT5G07220	8.09e-186	0.799717	0.486	0.022	1.68e-181
AT5G48620	1.05e-185	0.778646	0.458	0.019	2.18e-181
AT3G56080	1.26e-185	0.815638	0.366	0.01	2.6e-181
AT5G65670	2.36e-185	0.882548	0.542	0.028	4.9e-181
AT5G10695	2.84e-185	1.54679	0.676	0.046	5.89e-181
AT1G15240	3.94e-185	0.6136	0.423	0.015	8.17e-181
AT4G30600	7.6e-185	1.03791	0.556	0.03	1.58e-180
AT5G42050	1.45e-184	1.8923	0.838	0.074	3.01e-180
AT2G21195	1.71e-184	0.784037	0.38	0.012	3.55e-180
AT1G23490	3.62e-184	1.38839	0.852	0.076	7.5e-180
AT2G26530	4.58e-184	1.3622	0.648	0.042	9.49e-180
AT2G17550	5.46e-184	0.875941	0.317	0.007	1.13e-179
AT1G78680	1.05e-183	0.915268	0.507	0.024	2.17e-179
AT5G06870	1.29e-183	1.39536	0.444	0.018	2.68e-179
AT4G30340	1.44e-183	0.757029	0.261	0.003	2.98e-179
AT1G16110	1.5e-183	0.907871	0.38	0.012	3.1e-179
AT3G24530	1.84e-183	0.620713	0.345	0.009	3.81e-179
AT5G42000	3.77e-183	0.759998	0.345	0.009	7.83e-179
AT1G73740	8.67e-183	0.560338	0.268	0.004	1.8e-178
AT2G21520	9.36e-183	0.675804	0.465	0.02	1.94e-178
AT2G14255	1.05e-182	0.902025	0.338	0.009	2.17e-178
AT4G37080	1.15e-182	0.66464	0.38	0.012	2.38e-178
AT2G47650	1.3e-182	0.805102	0.324	0.007	2.7e-178
AT1G68530	2.47e-182	0.80356	0.648	0.042	5.12e-178
AT3G44260	3.02e-182	2.13887	0.866	0.081	6.26e-178
AT1G71020	3.27e-182	0.735928	0.338	0.009	6.79e-178
AT1G01830	4.24e-182	0.74317	0.345	0.009	8.79e-178
AT3G53540	6.17e-182	0.700541	0.282	0.005	1.28e-177
AT1G73030	6.23e-182	0.969057	0.528	0.028	1.29e-177
AT5G17440	9.9e-182	0.747753	0.401	0.014	2.05e-177
AT4G24130	1.2e-181	0.634387	0.246	0.003	2.49e-177
AT5G59550	1.54e-181	1.00643	0.57	0.033	3.2e-177
AT3G12610	2.43e-181	0.739903	0.373	0.011	5.04e-177
AT2G29300	4.54e-181	1.07361	0.43	0.017	9.42e-177
AT3G55740	5.88e-181	0.577513	0.254	0.003	1.22e-176
AT2G23320	6.62e-181	1.4082	0.641	0.043	1.37e-176
AT4G18880	7.04e-181	1.35997	0.5	0.024	1.46e-176
AT3G21250	1.01e-180	0.609437	0.423	0.016	2.09e-176
AT3G18930	1.02e-180	0.628432	0.317	0.007	2.12e-176
AT4G09570	1.44e-180	0.730167	0.331	0.008	2.99e-176
AT2G28950	1.54e-180	0.932204	0.514	0.026	3.19e-176
AT5G01780	2.48e-180	0.802321	0.303	0.006	5.13e-176
AT3G18680	2.56e-180	0.786238	0.373	0.012	5.3e-176
AT1G78170	3.22e-180	1.01959	0.31	0.007	6.67e-176
AT1G53430	4.42e-180	0.950825	0.423	0.016	9.16e-176
AT3G10740	5.56e-180	0.82147	0.394	0.013	1.15e-175
AT5G42030	5.97e-180	0.954228	0.563	0.032	1.24e-175
AT1G62330	6.81e-180	0.720164	0.289	0.005	1.41e-175
AT1G31130	8.48e-180	1.03617	0.458	0.02	1.76e-175
AT2G30440	9.97e-180	0.793277	0.493	0.024	2.07e-175
AT3G15095	1.14e-179	0.554909	0.373	0.012	2.37e-175
AT3G19400	1.24e-179	0.631137	0.296	0.006	2.57e-175
AT4G18020	1.84e-179	0.914836	0.338	0.009	3.82e-175
AT5G15190	3.32e-179	0.944199	0.296	0.006	6.89e-175
AT5G63790	3.4e-179	1.65942	0.697	0.052	7.04e-175
AT5G09870	4.02e-179	0.590402	0.486	0.023	8.33e-175
AT1G03850	4.47e-179	0.732692	0.225	0.002	9.26e-175
AT2G45970	4.53e-179	0.60268	0.268	0.004	9.39e-175
AT5G49730	6.58e-179	1.45285	0.606	0.038	1.36e-174
AT1G05010	1.1e-178	1.11311	0.627	0.04	2.27e-174
AT1G17840	1.2e-178	0.661729	0.401	0.014	2.49e-174
AT3G53990	1.33e-178	0.871084	0.641	0.043	2.76e-174
AT2G07050	1.47e-178	0.724432	0.401	0.014	3.05e-174
AT5G13180	1.63e-178	1.17389	0.542	0.03	3.38e-174
AT4G30660	1.91e-178	0.715815	0.423	0.016	3.97e-174
AT5G61960	3.58e-178	0.945239	0.43	0.017	7.41e-174
AT1G02340	9.61e-178	1.1158	0.401	0.014	1.99e-173
AT5G03120	9.87e-178	0.834906	0.366	0.011	2.05e-173
AT4G19520	1.12e-177	1.11015	0.662	0.046	2.32e-173
AT1G02390	1.54e-177	1.12558	0.31	0.007	3.19e-173
AT4G20830	1.58e-177	1.10868	0.718	0.055	3.27e-173
AT5G43700	1.72e-177	1.06613	0.528	0.028	3.56e-173
AT5G54730	1.76e-177	0.800021	0.423	0.016	3.65e-173
AT4G28250	2.76e-177	0.752751	0.373	0.012	5.71e-173
AT4G19860	2.97e-177	0.69821	0.408	0.015	6.15e-173
AT1G19300	5.79e-177	0.801865	0.317	0.007	1.2e-172
AT5G52060	1.57e-176	0.864533	0.493	0.024	3.26e-172
AT5G43620	1.65e-176	1.13755	0.549	0.031	3.42e-172
AT1G08900	3.04e-176	0.847592	0.359	0.011	6.3e-172
AT4G17900	4.05e-176	0.635167	0.43	0.017	8.4e-172
AT2G14890	4.06e-176	0.700088	0.542	0.03	8.42e-172
AT5G18460	4.32e-176	0.962456	0.268	0.004	8.96e-172
AT2G12400	4.38e-176	0.784543	0.352	0.01	9.08e-172
AT1G70895	4.63e-176	0.653262	0.19	0.001	9.6e-172
AT4G24380	4.65e-176	1.64188	0.606	0.039	9.65e-172
AT2G32200	9.8e-176	1.43741	0.289	0.006	2.03e-171
AT4G27870	1.2e-175	0.868067	0.268	0.004	2.48e-171
AT5G66590	1.44e-175	0.627601	0.408	0.015	2.99e-171
AT2G29340	1.75e-175	1.1368	0.57	0.034	3.62e-171
AT3G03870	1.91e-175	0.635263	0.415	0.016	3.95e-171
AT5G57220	2.07e-175	1.14792	0.275	0.005	4.29e-171
AT2G40460	2.22e-175	1.06461	0.458	0.021	4.59e-171
AT5G58200	2.9e-175	0.971774	0.577	0.035	6.02e-171
AT1G79380	2.9e-175	1.09811	0.465	0.021	6.02e-171
AT1G63090	3.42e-175	1.43038	0.549	0.032	7.09e-171
AT3G26450	3.91e-175	1.12588	0.81	0.069	8.1e-171
AT1G18390	4.31e-175	0.576761	0.239	0.003	8.94e-171
AT2G30550	4.83e-175	0.622695	0.352	0.01	1e-170
AT3G24929	5.47e-175	0.694324	0.366	0.012	1.13e-170
AT4G39730	5.52e-175	0.806303	0.718	0.056	1.14e-170
AT1G32700	7.17e-175	0.943424	0.57	0.034	1.49e-170
AT1G19670	8.05e-175	0.905059	0.472	0.022	1.67e-170
AT5G06700	1.96e-174	0.925836	0.444	0.019	4.07e-170
AT3G63500	2.62e-174	0.442072	0.465	0.021	5.44e-170
AT5G46710	2.98e-174	0.980052	0.423	0.017	6.18e-170
AT5G34850	3.05e-174	0.681871	0.57	0.034	6.32e-170
AT3G28130	4.21e-174	0.708994	0.366	0.012	8.72e-170
AT3G61890	7.66e-174	1.05693	0.535	0.03	1.59e-169
AT4G32480	8.1e-174	1.17771	0.627	0.042	1.68e-169
AT1G15740	8.59e-174	0.898144	0.444	0.019	1.78e-169
AT1G18740	9.27e-174	1.33721	0.718	0.057	1.92e-169
AT5G13200	9.56e-174	1.12213	0.401	0.015	1.98e-169
AT4G36140	2.05e-173	0.735174	0.366	0.012	4.26e-169
AT5G03760	2.37e-173	1.19255	0.592	0.037	4.92e-169
AT5G63860	2.43e-173	0.603693	0.352	0.01	5.04e-169
AT3G11410	4.65e-173	1.33558	0.697	0.054	9.63e-169
AT5G63410	6.42e-173	0.719848	0.275	0.005	1.33e-168
AT1G13280	6.88e-173	0.666998	0.338	0.009	1.43e-168
AT5G41070	9.92e-173	0.686233	0.232	0.003	2.06e-168
AT3G16800	1.14e-172	0.849863	0.366	0.012	2.35e-168
AT1G64065	1.21e-172	0.80747	0.275	0.005	2.51e-168
AT1G23480	1.73e-172	0.820834	0.275	0.005	3.59e-168
AT1G02350	2.11e-172	0.609647	0.218	0.002	4.37e-168
AT3G29075	3.81e-172	0.705353	0.394	0.015	7.89e-168
AT1G42990	4.08e-172	1.31617	0.57	0.035	8.47e-168
AT3G62260	4.16e-172	1.14041	0.423	0.017	8.62e-168
AT5G66675	4.63e-172	0.745622	0.451	0.02	9.61e-168
AT3G56400	4.71e-172	1.9159	0.465	0.022	9.77e-168
AT5G61210	4.88e-172	1.36661	0.472	0.023	1.01e-167
AT4G12980	5.44e-172	0.784683	0.352	0.011	1.13e-167
AT2G17120	5.89e-172	1.20962	0.359	0.011	1.22e-167
AT1G74940	6.56e-172	1.0009	0.415	0.017	1.36e-167
AT2G02860	6.77e-172	0.650892	0.303	0.007	1.4e-167
AT3G14050	7.28e-172	0.961738	0.408	0.016	1.51e-167
AT4G37300	8.85e-172	0.959975	0.69	0.053	1.83e-167
AT4G36980	8.89e-172	0.952419	0.606	0.04	1.84e-167
AT2G42300	1.07e-171	0.689633	0.338	0.01	2.21e-167
AT3G56410	1.3e-171	0.497818	0.458	0.021	2.7e-167
AT3G08760	1.97e-171	0.842372	0.373	0.013	4.09e-167
AT4G33920	2.09e-171	1.11536	0.486	0.024	4.33e-167
AT5G65050	2.31e-171	0.93222	0.387	0.014	4.8e-167
AT1G75220	2.82e-171	0.748504	0.394	0.015	5.85e-167
AT3G15760	3.24e-171	1.01483	0.423	0.017	6.71e-167
AT1G64380	4.07e-171	1.10987	0.296	0.006	8.44e-167
AT3G16940	1.15e-170	0.907997	0.451	0.021	2.38e-166
AT5G65380	1.21e-170	0.924346	0.528	0.03	2.52e-166
AT3G05220	1.22e-170	0.600318	0.486	0.024	2.53e-166
AT1G77080	1.93e-170	0.743612	0.415	0.017	4e-166
AT4G22540	2.36e-170	0.839138	0.38	0.013	4.89e-166
AT1G29430	2.36e-170	0.867213	0.373	0.013	4.89e-166
AT1G53170	2.36e-170	0.893167	0.585	0.037	4.89e-166
AT4G16500	2.43e-170	0.84514	0.31	0.007	5.03e-166
AT5G42100	2.47e-170	0.637322	0.38	0.013	5.12e-166
AT1G73480	2.51e-170	0.941375	0.535	0.031	5.2e-166
AT5G19240	3.99e-170	2.96889	0.894	0.104	8.27e-166
AT1G02960	4.07e-170	0.547735	0.268	0.005	8.44e-166
AT5G25280	5.06e-170	1.77552	0.803	0.073	1.05e-165
AT4G18570	6.4e-170	0.581778	0.268	0.005	1.33e-165
AT4G23220	9.13e-170	0.897098	0.282	0.006	1.89e-165
AT4G20300	2.49e-169	0.817608	0.437	0.019	5.17e-165
AT2G30040	3.38e-169	1.18586	0.521	0.029	7e-165
AT5G64330	4.84e-169	0.844369	0.345	0.01	1e-164
AT1G77210	4.93e-169	1.05411	0.303	0.007	1.02e-164
AT1G66100	6.04e-169	2.00856	0.739	0.062	1.25e-164
AT1G08230	6.62e-169	0.731706	0.296	0.007	1.37e-164
AT2G37550	6.82e-169	0.690218	0.387	0.014	1.41e-164
AT5G20650	7.06e-169	0.67657	0.577	0.037	1.46e-164
AT4G27652	1.1e-168	1.69447	0.775	0.068	2.28e-164
AT1G24190	1.2e-168	0.779793	0.345	0.01	2.49e-164
AT5G16830	1.28e-168	0.940459	0.458	0.022	2.65e-164
AT3G23640	2.1e-168	0.457487	0.296	0.007	4.36e-164
AT3G25690	2.12e-168	1.07022	0.711	0.057	4.39e-164
AT4G00400	2.76e-168	0.542079	0.296	0.007	5.72e-164
AT1G79830	2.83e-168	0.671855	0.5	0.026	5.87e-164
AT2G17840	3.24e-168	1.91622	0.599	0.04	6.71e-164
AT4G18197	3.75e-168	0.933863	0.324	0.009	7.78e-164
AT4G01330	4.11e-168	0.831552	0.43	0.019	8.52e-164
AT1G03740	5.5e-168	0.703319	0.31	0.008	1.14e-163
AT5G18030	8.96e-168	1.27348	0.317	0.008	1.86e-163
AT4G30440	1.61e-167	1.04557	0.57	0.036	3.34e-163
AT4G24740	2.35e-167	0.916508	0.423	0.018	4.87e-163
AT3G09830	2.93e-167	1.14572	0.401	0.016	6.07e-163
AT3G49220	3.45e-167	0.873931	0.423	0.018	7.15e-163
AT1G16130	4.54e-167	0.70747	0.282	0.006	9.41e-163
AT1G12750	5.69e-167	0.672261	0.324	0.009	1.18e-162
AT2G37940	7.16e-167	1.03951	0.387	0.015	1.48e-162
AT3G13720	9.93e-167	0.504239	0.338	0.01	2.06e-162
AT5G57700	1.25e-166	0.635023	0.254	0.004	2.6e-162
AT1G64640	1.26e-166	0.756904	0.338	0.01	2.6e-162
AT1G60190	1.29e-166	1.33178	0.62	0.044	2.68e-162
AT4G25030	1.61e-166	1.16879	0.472	0.024	3.34e-162
AT3G15730	1.76e-166	0.558416	0.641	0.046	3.65e-162
AT4G34150	1.78e-166	1.93773	0.803	0.075	3.69e-162
AT1G75680	2.2e-166	0.490182	0.423	0.018	4.56e-162
AT1G68560	3.69e-166	0.664248	0.394	0.015	7.64e-162
AT1G09440	4.22e-166	0.523749	0.225	0.003	8.75e-162
AT1G15280	7.23e-166	0.650097	0.444	0.021	1.5e-161
AT5G18080	7.9e-166	1.40648	0.338	0.01	1.64e-161
AT4G21740	1.02e-165	0.760203	0.317	0.009	2.12e-161
AT3G55880	1.07e-165	0.896816	0.289	0.006	2.21e-161
AT1G17720	1.1e-165	0.81037	0.458	0.022	2.27e-161
AT4G29220	1.5e-165	0.834681	0.408	0.017	3.1e-161
AT3G08530	1.58e-165	0.57072	0.38	0.014	3.28e-161
AT5G24735	2.06e-165	0.510753	0.444	0.021	4.27e-161
AT3G04940	4.03e-165	0.713441	0.38	0.014	8.36e-161
AT5G02290	5.53e-165	0.715638	0.359	0.012	1.15e-160
AT1G01610	5.64e-165	0.552666	0.289	0.006	1.17e-160
AT5G22770	7.14e-165	0.712215	0.373	0.013	1.48e-160
AT2G27050	1.36e-164	0.623864	0.444	0.021	2.82e-160
AT1G76600	1.41e-164	1.63985	0.761	0.068	2.93e-160
AT1G03230	1.5e-164	0.724411	0.282	0.006	3.1e-160
AT5G22050	1.6e-164	0.611703	0.415	0.018	3.32e-160
AT3G18370	2.17e-164	0.665556	0.303	0.007	4.49e-160
AT5G53460	3.1e-164	0.672736	0.711	0.058	6.43e-160
AT1G77855	3.38e-164	0.576672	0.19	0.001	7.01e-160
AT3G45740	3.75e-164	0.613813	0.268	0.005	7.78e-160
AT2G38470	4.05e-164	2.15297	0.725	0.063	8.4e-160
AT2G41110	6.31e-164	0.772441	0.577	0.038	1.31e-159
AT3G48650	8.34e-164	1.47631	0.246	0.004	1.73e-159
AT5G46210	1.04e-163	0.574148	0.444	0.021	2.15e-159
AT2G03640	1.07e-163	0.753541	0.415	0.018	2.22e-159
AT5G38530	1.13e-163	0.482792	0.275	0.006	2.34e-159
AT3G61420	1.34e-163	0.515716	0.331	0.01	2.77e-159
AT1G18610	1.65e-163	0.399211	0.254	0.004	3.42e-159
AT4G17490	1.71e-163	1.19776	0.444	0.021	3.55e-159
AT1G15580	1.73e-163	1.01591	0.246	0.004	3.59e-159
AT2G42380	1.75e-163	1.00416	0.359	0.012	3.62e-159
AT5G50950	1.78e-163	1.06237	0.655	0.05	3.68e-159
AT5G52870	1.78e-163	0.910845	0.268	0.005	3.7e-159
AT4G27300	2.05e-163	1.09496	0.408	0.017	4.25e-159
AT3G47295	2.61e-163	1.14033	0.451	0.022	5.4e-159
AT5G10250	3.85e-163	0.990331	0.218	0.002	7.99e-159
AT1G70700	4.69e-163	1.83517	0.62	0.045	9.72e-159
AT1G73500	6.37e-163	0.991113	0.458	0.023	1.32e-158
AT5G65300	6.78e-163	1.12969	0.317	0.009	1.41e-158
AT4G12880	7.59e-163	0.480877	0.486	0.025	1.57e-158
AT3G19130	9.95e-163	0.78744	0.345	0.011	2.06e-158
AT2G36410	1.13e-162	0.625861	0.345	0.011	2.34e-158
AT4G37800	1.49e-162	0.81723	0.662	0.05	3.08e-158
AT5G64740	1.54e-162	0.703195	0.669	0.052	3.19e-158
AT1G12500	1.56e-162	0.684064	0.38	0.015	3.23e-158
AT5G53570	1.59e-162	0.779987	0.303	0.008	3.3e-158
AT1G27770	1.75e-162	1.24107	0.683	0.054	3.63e-158
AT3G52740	1.83e-162	0.6533	0.394	0.016	3.8e-158
AT2G06530	2.42e-162	0.908122	0.528	0.032	5.03e-158
AT2G27830	3.72e-162	0.749281	0.5	0.028	7.71e-158
AT4G08850	3.85e-162	0.681413	0.437	0.02	7.98e-158
AT1G30530	4.06e-162	0.670495	0.317	0.009	8.41e-158
AT1G05675	4.67e-162	1.72072	0.38	0.014	9.67e-158
AT2G43070	7.35e-162	0.602225	0.296	0.007	1.52e-157
AT5G57560	1.43e-161	2.21548	0.782	0.075	2.96e-157
AT1G50640	2.04e-161	0.543409	0.38	0.015	4.23e-157
AT3G51600	2.41e-161	1.10715	0.746	0.064	5.01e-157
AT1G05830	3.73e-161	0.556803	0.317	0.009	7.74e-157
AT5G03210	4.37e-161	1.92761	0.585	0.04	9.07e-157
AT1G19130	5.69e-161	0.603805	0.324	0.01	1.18e-156
AT1G56240	5.88e-161	1.19779	0.197	0.001	1.22e-156
AT5G07580	7.7e-161	1.08954	0.394	0.016	1.6e-156
AT3G04730	7.81e-161	0.921972	0.718	0.061	1.62e-156
AT4G16140	8.65e-161	0.691986	0.211	0.002	1.79e-156
AT5G20270	1.06e-160	0.62233	0.31	0.008	2.2e-156
AT4G38690	1.28e-160	0.522253	0.458	0.023	2.66e-156
AT3G18850	1.42e-160	0.730472	0.289	0.007	2.95e-156
AT3G24160	1.62e-160	0.399484	0.535	0.033	3.35e-156
AT5G06310	2.02e-160	0.515829	0.155	0	4.18e-156
AT3G16690	2.13e-160	0.561741	0.246	0.004	4.41e-156
AT1G63690	2.14e-160	0.683229	0.38	0.015	4.44e-156
AT2G22430	2.27e-160	1.1107	0.669	0.054	4.7e-156
AT4G29780	2.43e-160	1.5151	0.725	0.063	5.04e-156
AT5G18490	2.64e-160	0.524854	0.246	0.004	5.48e-156
AT1G75440	2.74e-160	0.899829	0.423	0.019	5.69e-156
AT4G14270	3.71e-160	1.1249	0.423	0.019	7.69e-156
AT3G57400	4.54e-160	0.530653	0.373	0.014	9.4e-156
AT1G12240	4.66e-160	0.8538	0.5	0.028	9.66e-156
AT5G67385	5.4e-160	0.811582	0.437	0.021	1.12e-155
AT2G45810	5.6e-160	0.636183	0.444	0.022	1.16e-155
AT1G02880	5.6e-160	0.742677	0.282	0.006	1.16e-155
AT3G12630	7.62e-160	0.68161	0.676	0.054	1.58e-155
AT3G56880	8.96e-160	1.24451	0.754	0.068	1.86e-155
AT4G12730	1.03e-159	0.579957	0.423	0.019	2.13e-155
AT5G24590	1.15e-159	0.907966	0.493	0.028	2.39e-155
AT2G21120	1.25e-159	0.789923	0.359	0.013	2.58e-155
AT1G01720	2.73e-159	1.13193	0.542	0.034	5.66e-155
AT4G11211	2.94e-159	0.572174	0.577	0.038	6.09e-155
AT1G09560	7.13e-159	0.613925	0.387	0.016	1.48e-154
AT4G34180	8.5e-159	1.1007	0.401	0.017	1.76e-154
AT2G30020	1.2e-158	1.87837	0.711	0.062	2.48e-154
AT5G49720	1.2e-158	0.49431	0.585	0.04	2.49e-154
AT2G32210	1.6e-158	1.13388	0.275	0.006	3.31e-154
AT2G29360	1.78e-158	0.84068	0.507	0.03	3.7e-154
AT3G29390	1.97e-158	0.661756	0.394	0.016	4.09e-154
AT2G44740	2.01e-158	0.547623	0.225	0.003	4.17e-154
AT1G72700	3.08e-158	0.410791	0.275	0.006	6.39e-154
AT2G31800	4.38e-158	0.628211	0.38	0.015	9.08e-154
AT5G24030	4.78e-158	0.704815	0.394	0.016	9.9e-154
AT4G14350	5.69e-158	0.656974	0.366	0.014	1.18e-153
AT5G27350	6.19e-158	1.12532	0.479	0.026	1.28e-153
AT1G27290	8.01e-158	0.712797	0.57	0.039	1.66e-153
AT4G00300	9.38e-158	0.529438	0.338	0.011	1.94e-153
AT3G12740	1.33e-157	0.7009	0.352	0.012	2.76e-153
AT5G47200	1.35e-157	0.646384	0.486	0.027	2.8e-153
AT3G46590	1.37e-157	0.59436	0.486	0.027	2.85e-153
AT1G13090	1.68e-157	0.694625	0.31	0.009	3.49e-153
AT3G27560	2.61e-157	0.639189	0.296	0.008	5.42e-153
AT5G16260	2.64e-157	0.599638	0.282	0.007	5.47e-153
AT5G60920	2.66e-157	0.581429	0.514	0.031	5.52e-153
ATCG00820	5.03e-157	0.675339	0.69	0.057	1.04e-152
AT3G61130	6.19e-157	0.502126	0.366	0.014	1.28e-152
AT4G27280	6.51e-157	1.67372	0.761	0.07	1.35e-152
AT2G35710	7.83e-157	0.583463	0.239	0.004	1.62e-152
AT2G34300	9.74e-157	0.689264	0.387	0.016	2.02e-152
AT2G41420	3.05e-156	0.588685	0.606	0.044	6.32e-152
AT4G25970	3.58e-156	0.713263	0.289	0.007	7.43e-152
AT1G61470	4.02e-156	0.541483	0.275	0.006	8.34e-152
AT3G44735	4.41e-156	0.701362	0.338	0.011	9.14e-152
ATCG00740	6.72e-156	0.939083	0.613	0.045	1.39e-151
AT5G46780	1.65e-155	0.711393	0.38	0.015	3.42e-151
AT3G52800	1.69e-155	1.67117	0.824	0.084	3.51e-151
AT4G36190	1.91e-155	0.538182	0.394	0.017	3.95e-151
AT1G18660	2.78e-155	0.601721	0.437	0.022	5.76e-151
AT1G80840	2.8e-155	2.5786	0.81	0.087	5.81e-151
AT1G80790	2.82e-155	0.466624	0.5	0.029	5.86e-151
AT5G11790	2.99e-155	0.70646	0.394	0.017	6.19e-151
AT5G65925	3.32e-155	0.806724	0.289	0.007	6.88e-151
AT1G22280	4.2e-155	1.00256	0.401	0.018	8.71e-151
AT5G02480	4.48e-155	0.558138	0.451	0.023	9.28e-151
AT3G01820	4.74e-155	1.1298	0.338	0.012	9.83e-151
ATCG00380	5.47e-155	0.823828	0.577	0.04	1.13e-150
AT5G42570	7.35e-155	1.0001	0.331	0.011	1.52e-150
AT2G24790	1.03e-154	0.625334	0.676	0.056	2.15e-150
AT5G05140	1.2e-154	0.73746	0.345	0.012	2.49e-150
AT3G52500	1.4e-154	0.806021	0.352	0.013	2.9e-150
AT2G16370	1.48e-154	0.551477	0.239	0.004	3.07e-150
AT4G04340	1.7e-154	0.925974	0.493	0.029	3.52e-150
AT3G50845	1.85e-154	0.502257	0.232	0.004	3.84e-150
AT3G51150	2.09e-154	0.772505	0.352	0.013	4.33e-150
AT2G45010	2.23e-154	0.641733	0.275	0.006	4.62e-150
AT3G57450	2.37e-154	1.41282	0.725	0.066	4.92e-150
AT1G14740	3.12e-154	0.641469	0.472	0.026	6.47e-150
AT1G01550	3.22e-154	0.668699	0.563	0.039	6.68e-150
AT1G05870	3.51e-154	0.777854	0.387	0.016	7.29e-150
AT1G79990	3.62e-154	0.686277	0.366	0.014	7.52e-150
AT4G23020	4.12e-154	0.479798	0.246	0.004	8.53e-150
AT4G14450	4.59e-154	1.22208	0.204	0.002	9.52e-150
AT1G03430	4.6e-154	0.696827	0.289	0.007	9.55e-150
AT3G14595	5.35e-154	0.729794	0.521	0.033	1.11e-149
AT3G23820	5.65e-154	0.891061	0.648	0.052	1.17e-149
AT5G66730	5.82e-154	0.675964	0.387	0.016	1.21e-149
AT2G32950	6.54e-154	0.626861	0.366	0.014	1.36e-149
ATCG00530	8.16e-154	1.01271	0.465	0.025	1.69e-149
AT3G19370	9.05e-154	0.574433	0.275	0.006	1.88e-149
AT4G34460	9.51e-154	0.864402	0.415	0.019	1.97e-149
AT3G17050.1	1e-153	0.765104	0.444	0.022	2.07e-149
AT4G38860	1.29e-153	0.953294	0.387	0.016	2.67e-149
AT2G35930	3.6e-153	1.32493	0.57	0.04	7.45e-149
AT3G16570	4.07e-153	0.458265	0.57	0.039	8.45e-149
AT2G39705	4.32e-153	0.828291	0.31	0.009	8.96e-149
AT1G04430	4.57e-153	0.589709	0.38	0.016	9.47e-149
AT5G40450	5.49e-153	0.889843	0.782	0.075	1.14e-148
AT3G09540	7.33e-153	0.475564	0.211	0.003	1.52e-148
AT4G22010	8.44e-153	0.667518	0.211	0.003	1.75e-148
AT2G35630	9.56e-153	0.591682	0.472	0.026	1.98e-148
AT3G52370	9.69e-153	0.534748	0.268	0.006	2.01e-148
AT4G30530	1.2e-152	1.24349	0.57	0.04	2.5e-148
AT3G11810	1.25e-152	0.699994	0.261	0.006	2.59e-148
AT3G48720	1.36e-152	0.855884	0.31	0.009	2.82e-148
AT5G65620	2.23e-152	0.601166	0.387	0.017	4.62e-148
AT1G18890	2.96e-152	0.561218	0.324	0.01	6.13e-148
AT2G39660	3.03e-152	0.754477	0.261	0.006	6.27e-148
AT3G06750	3.33e-152	0.851689	0.563	0.039	6.9e-148
AT2G32690	3.44e-152	0.766949	0.838	0.083	7.13e-148
AT4G01290	3.46e-152	0.55422	0.401	0.018	7.17e-148
AT3G19010	4.63e-152	1.27555	0.486	0.028	9.59e-148
AT5G35180	6.63e-152	0.755434	0.38	0.016	1.38e-147
AT2G03730	7.31e-152	0.825545	0.317	0.01	1.52e-147
AT5G42870	1.01e-151	0.482838	0.303	0.009	2.09e-147
ATCG00080	1.23e-151	0.668062	0.585	0.042	2.55e-147
AT5G06980	1.69e-151	0.706162	0.507	0.032	3.49e-147
AT1G49750	1.88e-151	0.855034	0.387	0.017	3.89e-147
AT3G19580	2.09e-151	1.07513	0.521	0.033	4.34e-147
AT3G59060	2.89e-151	1.27868	0.859	0.093	5.99e-147
AT1G76900	3.26e-151	0.650713	0.331	0.011	6.76e-147
ATCG00720	3.38e-151	0.691201	0.697	0.06	7e-147
AT5G35170	3.78e-151	0.733315	0.676	0.057	7.83e-147
AT4G23470	4.62e-151	0.867165	0.458	0.025	9.58e-147
AT4G11330	5.21e-151	0.644709	0.296	0.008	1.08e-146
AT4G18950	6.44e-151	1.03244	0.366	0.015	1.34e-146
AT5G58140	9.38e-151	0.667255	0.69	0.06	1.94e-146
AT5G54170	9.54e-151	0.76235	0.458	0.025	1.98e-146
AT3G52450	1.02e-150	1.22493	0.352	0.013	2.12e-146
AT1G72450	1.08e-150	1.09834	0.514	0.033	2.25e-146
AT2G06025	1.17e-150	0.589472	0.458	0.025	2.44e-146
AT3G43300	1.29e-150	0.74747	0.345	0.013	2.68e-146
AT1G32150	1.48e-150	0.532923	0.296	0.008	3.07e-146
AT4G23880	1.85e-150	0.76192	0.268	0.006	3.83e-146
AT2G22670	3.96e-150	0.441	0.556	0.039	8.2e-146
AT1G80440	4.63e-150	1.5013	0.81	0.083	9.6e-146
AT1G15260	5.43e-150	0.690429	0.401	0.018	1.13e-145
AT4G24805	5.68e-150	0.671325	0.317	0.01	1.18e-145
AT2G44500	5.78e-150	0.974027	0.394	0.018	1.2e-145
AT2G15040	6.07e-150	0.449904	0.204	0.002	1.26e-145
AT4G23850	7.41e-150	0.629573	0.563	0.04	1.54e-145
AT3G28340	7.76e-150	0.912843	0.352	0.013	1.61e-145
AT5G64310	1.34e-149	2.05523	0.676	0.06	2.77e-145
AT5G59840	1.4e-149	0.701976	0.317	0.01	2.89e-145
AT3G24550	1.39e-149	0.81485	0.472	0.027	2.89e-145
AT1G22610	1.56e-149	0.565191	0.373	0.016	3.23e-145
AT2G47070	2.38e-149	0.491247	0.451	0.025	4.94e-145
AT3G62750	3.06e-149	0.737036	0.394	0.018	6.35e-145
AT2G24330	3.2e-149	0.833275	0.275	0.007	6.63e-145
AT3G01290	3.36e-149	1.06051	0.408	0.019	6.97e-145
AT3G63310	3.39e-149	0.575087	0.359	0.014	7.02e-145
AT5G56170	3.86e-149	0.678492	0.465	0.026	8e-145
AT4G36690	5.02e-149	0.572064	0.479	0.028	1.04e-144
AT5G37370	5.41e-149	0.715876	0.352	0.014	1.12e-144
AT3G53260	5.66e-149	0.661277	0.43	0.022	1.17e-144
AT3G57550	5.95e-149	0.47957	0.254	0.005	1.23e-144
AT1G66160	7.03e-149	0.94611	0.423	0.021	1.46e-144
AT1G33240	7.32e-149	0.74905	0.394	0.018	1.52e-144
AT1G33050	7.39e-149	0.497278	0.331	0.012	1.53e-144
AT5G53130	7.87e-149	0.564736	0.331	0.012	1.63e-144
AT3G54020	1.42e-148	1.10873	0.352	0.014	2.93e-144
AT3G55360	1.57e-148	0.407894	0.338	0.012	3.25e-144
AT2G12461	1.97e-148	0.667445	0.218	0.003	4.08e-144
AT4G02430	2.23e-148	0.554089	0.282	0.007	4.62e-144
AT2G01180	3.14e-148	0.907159	0.352	0.014	6.51e-144
AT1G25480	3.25e-148	0.436247	0.218	0.003	6.73e-144
AT3G49260	3.99e-148	0.545327	0.218	0.003	8.28e-144
AT5G39030	4.78e-148	0.534878	0.282	0.007	9.91e-144
AT1G21830	5.45e-148	0.790415	0.415	0.021	1.13e-143
AT4G27720	5.8e-148	0.788426	0.38	0.017	1.2e-143
ATCG00580	6.34e-148	0.530605	0.493	0.03	1.32e-143
AT4G12310	6.72e-148	0.628018	0.239	0.004	1.39e-143
AT2G40095	6.74e-148	0.925231	0.225	0.004	1.4e-143
AT2G17880	8.02e-148	1.13665	0.359	0.015	1.66e-143
AT5G13100	8.22e-148	0.973113	0.465	0.027	1.7e-143
ATCG01050	8.3e-148	0.452124	0.514	0.033	1.72e-143
AT4G30996	9.04e-148	0.608499	0.317	0.01	1.87e-143
AT4G26610	1.32e-147	0.51329	0.324	0.011	2.74e-143
AT2G19620	1.42e-147	0.405856	0.197	0.002	2.94e-143
AT5G08500	1.84e-147	0.894388	0.345	0.013	3.82e-143
AT3G51920	2.48e-147	1.28684	0.859	0.095	5.15e-143
AT1G67360	2.83e-147	0.824543	0.352	0.014	5.87e-143
AT3G23920	5.18e-147	1.4164	0.718	0.068	1.07e-142
AT3G51550	6.18e-147	0.515329	0.43	0.022	1.28e-142
AT3G60030	6.26e-147	0.547646	0.289	0.008	1.3e-142
AT5G21090	7.74e-147	0.603086	0.627	0.051	1.61e-142
AT3G25500	8.5e-147	0.743515	0.296	0.009	1.76e-142
AT4G36520	9.5e-147	0.830117	0.549	0.038	1.97e-142
AT1G08200	1.26e-146	0.596858	0.613	0.048	2.6e-142
AT1G48480	1.48e-146	0.568323	0.261	0.006	3.07e-142
AT2G24420	1.99e-146	0.680383	0.415	0.021	4.13e-142
AT4G30690	2.14e-146	0.850642	0.444	0.024	4.44e-142
AT3G54200	2.28e-146	0.839877	0.359	0.015	4.72e-142
AT2G20180	2.78e-146	0.610737	0.359	0.015	5.76e-142
AT3G26510	2.86e-146	1.28521	0.852	0.093	5.93e-142
AT2G22990	2.93e-146	1.43249	0.782	0.08	6.07e-142
AT5G60640	3.43e-146	0.519907	0.366	0.015	7.1e-142
AT1G76070	3.47e-146	0.767542	0.254	0.006	7.18e-142
AT4G05070	4.09e-146	1.26624	0.789	0.081	8.48e-142
AT1G61100	4.11e-146	0.715606	0.415	0.021	8.51e-142
AT1G59870	4.19e-146	1.53904	0.718	0.067	8.7e-142
AT4G35100	4.41e-146	1.02879	0.669	0.058	9.15e-142
AT1G69220	4.77e-146	0.629427	0.324	0.011	9.88e-142
AT5G43330	5.6e-146	0.58019	0.303	0.009	1.16e-141
AT5G59450	5.76e-146	0.843816	0.331	0.012	1.19e-141
AT5G10060	6.45e-146	0.583765	0.246	0.005	1.34e-141
AT1G18810	1.24e-145	0.740007	0.254	0.006	2.57e-141
AT3G17120	2.05e-145	0.6492	0.268	0.007	4.26e-141
AT5G35210	2.21e-145	0.670837	0.415	0.021	4.59e-141
AT4G03070	3.38e-145	0.520829	0.211	0.003	7.01e-141
AT3G50890	4.06e-145	0.597446	0.211	0.003	8.41e-141
AT4G30900	4.56e-145	0.523793	0.232	0.004	9.46e-141
AT1G74670	4.85e-145	2.3556	0.838	0.098	1.01e-140
AT2G41870	5.18e-145	0.578976	0.486	0.03	1.07e-140
AT2G45450	6.81e-145	0.753642	0.239	0.005	1.41e-140
AT1G70530	8.65e-145	0.54984	0.261	0.006	1.79e-140
AT4G26790	9.35e-145	0.447043	0.218	0.003	1.94e-140
AT4G26555	1.07e-144	0.378587	0.423	0.022	2.22e-140
AT3G01680	1.85e-144	0.499403	0.232	0.004	3.83e-140
AT2G31810	1.89e-144	0.80374	0.415	0.021	3.92e-140
AT4G23810	3.05e-144	1.93735	0.38	0.017	6.33e-140
AT1G03410	4.9e-144	0.423614	0.317	0.011	1.02e-139
AT5G52280	9.06e-144	0.558252	0.324	0.012	1.88e-139
AT5G58430	9.63e-144	0.742002	0.479	0.029	2e-139
AT5G04550	9.98e-144	0.494336	0.465	0.028	2.07e-139
ATCG00810	1.01e-143	0.691165	0.535	0.037	2.1e-139
AT5G20050	1.17e-143	0.507012	0.317	0.011	2.42e-139
AT1G08450	1.23e-143	0.718517	0.359	0.015	2.54e-139
AT1G50750	1.76e-143	0.699464	0.197	0.002	3.64e-139
AT4G32020	1.8e-143	1.69572	0.908	0.11	3.73e-139
AT1G19020	2.06e-143	1.63789	0.514	0.035	4.26e-139
AT5G19120	2.33e-143	0.981181	0.528	0.037	4.82e-139
AT5G36910	2.63e-143	1.33943	0.725	0.069	5.46e-139
AT3G46530	2.67e-143	0.630373	0.542	0.039	5.54e-139
AT5G60210	2.79e-143	0.448681	0.197	0.002	5.79e-139
AT4G34760	3.34e-143	1.11072	0.296	0.009	6.93e-139
AT5G27950	4.88e-143	0.717716	0.408	0.021	1.01e-138
AT3G13870	5.83e-143	0.467289	0.408	0.021	1.21e-138
AT3G54620	6.01e-143	0.533713	0.366	0.016	1.25e-138
AT1G05850	6.05e-143	0.754107	0.824	0.089	1.25e-138
AT2G35880	6.37e-143	0.495639	0.338	0.013	1.32e-138
AT5G52240	6.71e-143	0.609312	0.373	0.017	1.39e-138
AT1G68670	7.57e-143	0.573807	0.521	0.036	1.57e-138
AT5G54630	9.21e-143	0.609406	0.289	0.009	1.91e-138
AT2G13790	1.25e-142	0.845072	0.275	0.007	2.6e-138
AT5G55230	1.32e-142	0.523014	0.359	0.015	2.74e-138
AT3G26980	1.4e-142	0.57685	0.303	0.01	2.9e-138
AT1G52310	1.46e-142	0.464522	0.239	0.005	3.04e-138
AT1G75860	1.49e-142	0.777798	0.345	0.014	3.08e-138
AT4G27657	1.99e-142	1.35416	0.648	0.056	4.13e-138
AT3G19340	2.21e-142	0.532978	0.352	0.015	4.59e-138
AT1G32130	2.46e-142	0.447009	0.437	0.024	5.11e-138
AT2G32150	2.52e-142	1.33005	0.662	0.059	5.23e-138
AT3G62630	2.86e-142	0.690307	0.31	0.01	5.92e-138
AT2G17560	2.94e-142	0.375321	0.352	0.015	6.1e-138
AT1G22740	3.34e-142	0.686605	0.211	0.003	6.93e-138
AT5G62390	3.76e-142	0.447947	0.458	0.027	7.8e-138
AT1G70410	4.3e-142	0.700873	0.62	0.051	8.91e-138
AT2G02450	4.31e-142	0.60552	0.204	0.003	8.94e-138
AT3G50900	5.67e-142	0.79799	0.261	0.006	1.18e-137
AT2G29510	6.05e-142	0.538238	0.317	0.011	1.26e-137
AT2G17450	6.91e-142	0.575796	0.423	0.023	1.43e-137
AT5G51190	7.28e-142	1.4134	0.493	0.032	1.51e-137
AT2G30420	8.98e-142	0.521239	0.211	0.003	1.86e-137
AT4G19040	1.2e-141	0.548743	0.268	0.007	2.49e-137
AT3G13750	1.21e-141	1.64526	0.711	0.069	2.5e-137
AT5G05890	1.25e-141	0.552922	0.225	0.004	2.59e-137
AT2G42040	1.41e-141	0.679125	0.225	0.004	2.92e-137
AT3G04110	1.49e-141	0.517761	0.225	0.004	3.09e-137
AT2G28150	1.97e-141	0.516389	0.225	0.004	4.08e-137
AT1G26580	4.2e-141	0.555211	0.401	0.02	8.71e-137
AT5G59960	4.21e-141	0.6792	0.317	0.011	8.72e-137
AT1G65295	4.79e-141	0.536567	0.254	0.006	9.93e-137
AT5G54640	5.07e-141	0.545253	0.268	0.007	1.05e-136
AT2G29290	5.05e-141	1.8518	0.669	0.062	1.05e-136
AT5G01970	6.3e-141	0.431183	0.19	0.002	1.31e-136
AT4G23870	9.04e-141	0.953165	0.296	0.009	1.87e-136
AT5G56360	9.26e-141	0.705781	0.303	0.01	1.92e-136
AT5G64960	1.08e-140	0.523953	0.296	0.009	2.25e-136
AT3G52470	1.15e-140	0.528933	0.324	0.012	2.39e-136
AT3G45850	1.16e-140	0.583121	0.296	0.009	2.4e-136
AT2G14045	1.39e-140	0.363756	0.465	0.028	2.87e-136
AT5G07240	1.65e-140	0.676752	0.296	0.009	3.42e-136
AT5G15870	2.41e-140	0.944029	0.275	0.008	4.99e-136
AT2G26170	2.44e-140	0.571413	0.176	0.001	5.06e-136
AT3G56790	2.8e-140	0.95014	0.331	0.013	5.81e-136
AT5G18150	3.36e-140	0.890525	0.373	0.017	6.96e-136
AT4G18670	3.81e-140	0.426323	0.246	0.006	7.9e-136
AT2G27190	4.08e-140	0.410341	0.261	0.007	8.46e-136
AT4G23570	7.59e-140	0.751409	0.352	0.015	1.57e-135
AT5G09880	8.95e-140	0.505019	0.451	0.027	1.85e-135
AT2G18700	1.34e-139	0.494167	0.542	0.04	2.79e-135
AT5G22920	1.35e-139	1.01366	0.577	0.045	2.79e-135
AT1G11260	1.38e-139	1.30691	0.556	0.042	2.87e-135
AT3G24050	1.58e-139	0.612989	0.401	0.021	3.28e-135
AT3G23810	1.6e-139	0.535749	0.57	0.044	3.31e-135
AT3G57330	1.69e-139	0.781985	0.352	0.015	3.5e-135
AT1G60260	1.96e-139	0.501358	0.268	0.007	4.06e-135
AT2G02950	1.99e-139	0.525505	0.261	0.007	4.13e-135
AT4G25620	2.05e-139	0.645774	0.373	0.017	4.25e-135
AT4G13840	2.23e-139	0.599075	0.401	0.02	4.63e-135
AT1G75800	3.6e-139	0.653757	0.338	0.014	7.47e-135
AT1G70280	3.66e-139	0.442856	0.296	0.01	7.58e-135
AT2G27310	4.08e-139	1.63278	0.394	0.02	8.47e-135
AT4G31000	4.55e-139	0.766795	0.282	0.008	9.44e-135
AT2G44180	4.95e-139	0.463354	0.232	0.005	1.03e-134
AT4G26080	5.13e-139	0.610471	0.43	0.024	1.06e-134
AT3G55980	5.39e-139	1.55853	0.838	0.096	1.12e-134
AT4G30280	5.5e-139	1.4587	0.345	0.014	1.14e-134
AT2G35860	5.66e-139	0.501216	0.352	0.015	1.17e-134
AT4G35830	6.77e-139	0.408323	0.592	0.048	1.4e-134
AT1G34260	7.09e-139	0.941508	0.338	0.014	1.47e-134
AT2G28940	7.97e-139	0.462196	0.218	0.004	1.65e-134
AT3G19380	9.28e-139	0.461343	0.317	0.012	1.92e-134
AT1G30190	1.38e-138	0.827367	0.218	0.004	2.86e-134
AT2G28400	1.4e-138	0.702345	0.338	0.014	2.91e-134
ATCG00790	1.46e-138	0.634283	0.542	0.04	3.02e-134
AT2G22795	2.08e-138	0.518842	0.423	0.023	4.32e-134
AT4G16380	2.24e-138	0.419366	0.479	0.031	4.64e-134
AT2G34150	2.7e-138	0.571164	0.211	0.003	5.59e-134
AT5G13190	4.31e-138	1.11286	0.5	0.034	8.93e-134
AT5G37770	6.13e-138	1.24115	0.761	0.08	1.27e-133
AT4G00520	6.39e-138	0.497296	0.261	0.007	1.33e-133
AT3G54140	9.28e-138	0.473197	0.261	0.007	1.92e-133
AT5G67300	1.04e-137	0.636881	0.655	0.059	2.16e-133
AT1G29460	1.26e-137	0.954315	0.289	0.009	2.62e-133
AT4G35320	2.67e-137	0.684418	0.366	0.017	5.53e-133
AT1G15200	3.34e-137	0.578788	0.444	0.026	6.93e-133
AT4G39680	4.38e-137	0.543483	0.458	0.028	9.08e-133
AT2G32700	4.67e-137	0.581024	0.373	0.018	9.68e-133
AT2G24600	5.4e-137	1.43083	0.507	0.035	1.12e-132
AT5G46510	5.9e-137	0.722718	0.359	0.016	1.22e-132
AT5G47070	5.87e-137	0.897139	0.38	0.019	1.22e-132
AT5G61140	7.22e-137	0.691089	0.331	0.013	1.5e-132
AT5G67140	7.38e-137	0.67827	0.268	0.007	1.53e-132
AT1G48320	7.43e-137	0.557101	0.331	0.013	1.54e-132
AT4G36250	7.78e-137	0.448942	0.331	0.013	1.61e-132
AT3G60530	9.53e-137	0.767772	0.331	0.013	1.98e-132
AT2G23980	1.29e-136	0.458435	0.275	0.008	2.68e-132
AT5G03230	2.12e-136	1.12115	0.486	0.033	4.39e-132
AT4G34480	2.22e-136	0.714094	0.338	0.014	4.61e-132
AT5G64770	3.24e-136	1.33977	0.789	0.086	6.73e-132
AT1G59970	3.66e-136	0.607456	0.197	0.003	7.6e-132
AT1G32640	4.56e-136	1.08284	0.697	0.068	9.45e-132
AT5G66900	4.77e-136	0.707823	0.338	0.014	9.88e-132
AT1G18840	5.07e-136	0.454998	0.197	0.003	1.05e-131
AT2G30070	5.37e-136	0.379052	0.197	0.003	1.11e-131
AT4G27310	5.9e-136	0.590492	0.5	0.035	1.22e-131
AT3G51840	6.79e-136	0.646542	0.514	0.037	1.41e-131
AT2G32970	7.58e-136	0.587961	0.401	0.021	1.57e-131
AT2G37840	7.59e-136	0.604751	0.261	0.007	1.57e-131
AT1G33055	9.88e-136	0.965042	0.289	0.009	2.05e-131
AT2G33050	1e-135	0.42002	0.197	0.003	2.07e-131
ATCG00570	1.03e-135	0.920153	0.627	0.055	2.15e-131
AT1G22550	1.08e-135	0.43629	0.197	0.003	2.24e-131
AT1G32540	1.13e-135	0.806194	0.31	0.011	2.35e-131
AT1G56580	1.47e-135	0.526356	0.345	0.015	3.04e-131
AT2G33120	1.5e-135	0.527679	0.408	0.022	3.12e-131
AT2G01910	1.53e-135	0.657467	0.31	0.011	3.17e-131
AT4G28290	1.71e-135	0.457183	0.352	0.016	3.55e-131
AT3G49780	1.94e-135	1.53473	0.366	0.017	4.03e-131
AT2G15320	2.32e-135	0.429228	0.211	0.004	4.8e-131
AT2G41180	2.93e-135	0.445636	0.282	0.009	6.07e-131
AT1G06800	3.87e-135	0.389096	0.246	0.006	8.02e-131
AT1G58440	4.5e-135	0.616576	0.268	0.008	9.34e-131
AT2G24280	5.16e-135	0.463426	0.444	0.027	1.07e-130
AT3G25600	5.21e-135	0.449676	0.324	0.013	1.08e-130
AT2G45820	5.65e-135	1.06654	0.732	0.075	1.17e-130
AT2G22080	6.11e-135	0.454446	0.408	0.022	1.27e-130
AT4G16765	6.35e-135	0.502684	0.239	0.006	1.32e-130
AT1G22930	1.02e-134	0.492534	0.465	0.03	2.11e-130
AT2G45470	1.56e-134	0.438522	0.43	0.025	3.23e-130
AT3G18690	1.84e-134	0.750819	0.254	0.007	3.81e-130
AT2G22830	1.94e-134	0.624959	0.183	0.002	4.02e-130
AT2G27770	2.3e-134	0.529176	0.254	0.007	4.76e-130
AT1G73600	2.46e-134	0.677084	0.268	0.008	5.11e-130
AT4G23270	2.55e-134	0.726967	0.268	0.008	5.29e-130
AT1G61340	3.33e-134	1.05483	0.303	0.011	6.91e-130
AT1G69610	3.56e-134	0.64145	0.183	0.002	7.38e-130
AT5G13400	4.49e-134	0.598332	0.254	0.007	9.31e-130
AT4G37260	6.69e-134	0.796716	0.507	0.036	1.39e-129
AT5G54860	8.2e-134	0.815899	0.232	0.005	1.7e-129
AT3G24520	8.28e-134	0.991987	0.5	0.035	1.72e-129
AT2G04690	8.74e-134	0.520725	0.317	0.012	1.81e-129
AT1G26920	1.5e-133	0.860489	0.394	0.021	3.1e-129
AT3G47680	1.76e-133	0.48908	0.261	0.007	3.65e-129
AT3G15770	2.46e-133	0.738446	0.366	0.018	5.1e-129
AT3G60600	2.83e-133	0.483849	0.423	0.025	5.87e-129
AT1G15890	2.87e-133	0.67998	0.296	0.01	5.96e-129
AT2G19600	2.99e-133	0.584371	0.19	0.003	6.21e-129
AT4G27654	3e-133	1.417	0.387	0.02	6.22e-129
AT5G11600	3.37e-133	0.463674	0.261	0.007	6.98e-129
AT4G29900	3.49e-133	0.522055	0.324	0.013	7.23e-129
AT5G08370	3.55e-133	0.694024	0.246	0.006	7.35e-129
AT1G67800	3.6e-133	0.626352	0.19	0.003	7.47e-129
AT3G08710	3.73e-133	0.725423	0.331	0.014	7.73e-129
AT3G50340	4.05e-133	1.0222	0.268	0.008	8.41e-129
AT3G03990	6.94e-133	0.560525	0.458	0.029	1.44e-128
AT1G24880	7.16e-133	0.587047	0.204	0.003	1.48e-128
AT3G44630	7.46e-133	0.615404	0.465	0.03	1.55e-128
AT1G58200	7.69e-133	0.585342	0.359	0.017	1.59e-128
AT4G21940	9.25e-133	0.715477	0.275	0.009	1.92e-128
AT1G13260	9.56e-133	1.04759	0.599	0.052	1.98e-128
AT1G15430	9.9e-133	0.903877	0.324	0.013	2.05e-128
AT1G27730	1.03e-132	1.61756	0.725	0.076	2.13e-128
AT1G28280	1.03e-132	0.507755	0.437	0.026	2.14e-128
AT4G13040	1.04e-132	0.679688	0.282	0.009	2.15e-128
ATCG00780	1.15e-132	0.643069	0.444	0.027	2.38e-128
AT4G22780	1.22e-132	0.578132	0.268	0.008	2.53e-128
AT1G29450	1.26e-132	1.33524	0.289	0.01	2.61e-128
AT3G56800	2.01e-132	0.828412	0.746	0.079	4.17e-128
AT1G76380	2.19e-132	0.402996	0.211	0.004	4.53e-128
AT5G50000	2.78e-132	0.540374	0.352	0.016	5.76e-128
AT1G79700	2.79e-132	0.622454	0.204	0.003	5.79e-128
AT1G29890	2.82e-132	0.501028	0.204	0.003	5.84e-128
AT5G47910	2.98e-132	0.834664	0.338	0.015	6.17e-128
AT1G33990	3.33e-132	0.410792	0.38	0.019	6.91e-128
AT2G22300	3.43e-132	0.440671	0.352	0.016	7.12e-128
AT5G18850	3.54e-132	0.607096	0.317	0.013	7.34e-128
AT5G08150	3.93e-132	0.675273	0.197	0.003	8.14e-128
AT1G49780	3.96e-132	0.541946	0.296	0.01	8.21e-128
AT2G17300	4.18e-132	0.443889	0.254	0.007	8.67e-128
AT5G32450	4.3e-132	0.401464	0.289	0.01	8.92e-128
AT3G57020	5.5e-132	0.678063	0.437	0.027	1.14e-127
AT1G02860	5.65e-132	0.519443	0.254	0.007	1.17e-127
AT3G50830	1.04e-131	0.482012	0.408	0.023	2.15e-127
AT5G13205.1	1.22e-131	0.750789	0.176	0.002	2.53e-127
AT3G45230	1.34e-131	0.540758	0.176	0.002	2.77e-127
AT1G19780	1.65e-131	0.509677	0.134	0	3.42e-127
AT1G01020	1.73e-131	0.633996	0.232	0.005	3.58e-127
AT4G38840	1.75e-131	1.27561	0.345	0.016	3.64e-127
AT2G44160	1.93e-131	0.566756	0.423	0.025	3.99e-127
AT1G73540	3.07e-131	1.95783	0.901	0.121	6.36e-127
AT5G40340	3.59e-131	0.457293	0.725	0.075	7.44e-127
AT5G22640	3.75e-131	0.250818	0.549	0.044	7.78e-127
AT1G07000	4e-131	0.378595	0.261	0.007	8.29e-127
AT5G50450	5.38e-131	0.681768	0.246	0.006	1.12e-126
AT2G32580	5.46e-131	0.417312	0.331	0.014	1.13e-126
AT2G41410	6.45e-131	0.437793	0.472	0.032	1.34e-126
AT2G36220	7.19e-131	0.71347	0.444	0.028	1.49e-126
AT4G27520	7.18e-131	1.55223	0.831	0.101	1.49e-126
AT1G12520	8.99e-131	0.636283	0.317	0.013	1.86e-126
AT3G11700	9.73e-131	0.541712	0.451	0.029	2.02e-126
AT1G29510	1.08e-130	1.126	0.338	0.015	2.23e-126
AT1G66260	1.16e-130	0.593435	0.5	0.036	2.41e-126
AT5G24670	1.2e-130	0.616018	0.317	0.013	2.49e-126
AT5G58100	1.58e-130	0.616891	0.282	0.009	3.28e-126
AT2G41250	1.6e-130	0.795768	0.5	0.037	3.32e-126
AT3G46600	1.62e-130	0.730079	0.542	0.043	3.37e-126
AT1G03200	1.69e-130	0.489716	0.225	0.005	3.51e-126
AT2G25800	2.07e-130	0.43347	0.282	0.009	4.3e-126
AT4G19420	2.23e-130	1.14337	0.423	0.025	4.63e-126
AT1G49450	2.25e-130	1.33497	0.254	0.007	4.66e-126
AT5G02970	2.89e-130	0.351241	0.225	0.005	5.99e-126
AT3G03880	4.75e-130	0.492411	0.239	0.006	9.85e-126
AT2G45170	4.97e-130	0.621001	0.514	0.039	1.03e-125
AT5G47390	6.05e-130	0.487562	0.444	0.028	1.25e-125
AT3G06740	7.47e-130	0.57224	0.218	0.004	1.55e-125
AT4G02410	8.38e-130	0.684269	0.31	0.012	1.74e-125
AT1G28600	9.75e-130	0.53381	0.254	0.007	2.02e-125
AT5G64030	1.01e-129	0.755727	0.415	0.025	2.09e-125
AT3G02840	1.11e-129	1.21355	0.359	0.018	2.31e-125
AT1G19350	1.46e-129	0.742041	0.528	0.041	3.03e-125
AT3G26100	1.56e-129	0.573136	0.366	0.018	3.24e-125
AT1G13000	1.8e-129	0.467866	0.211	0.004	3.74e-125
AT3G05910	1.96e-129	0.411569	0.31	0.012	4.06e-125
AT1G21980	2.22e-129	0.853818	0.268	0.008	4.6e-125
AT3G61260	2.49e-129	0.406312	0.648	0.062	5.15e-125
AT3G17510	2.71e-129	0.606165	0.5	0.037	5.62e-125
AT3G54960	2.8e-129	0.567251	0.197	0.003	5.81e-125
AT5G18060	3.56e-129	0.864778	0.246	0.007	7.39e-125
AT2G34925	3.59e-129	0.359459	0.155	0.001	7.44e-125
AT5G16110	3.61e-129	0.509048	0.479	0.034	7.49e-125
AT3G02300	3.79e-129	0.643107	0.282	0.01	7.85e-125
AT4G34710	4.86e-129	0.582227	0.556	0.046	1.01e-124
AT4G17940	5.01e-129	0.565435	0.331	0.015	1.04e-124
AT5G62020	5.27e-129	0.655093	0.359	0.018	1.09e-124
AT4G27595	5.45e-129	0.491449	0.197	0.003	1.13e-124
AT2G46500	5.51e-129	0.420769	0.352	0.017	1.14e-124
AT5G57760	5.78e-129	0.747497	0.204	0.004	1.2e-124
AT2G45200	5.85e-129	0.39698	0.268	0.008	1.21e-124
AT1G55310	6.8e-129	0.505474	0.296	0.011	1.41e-124
AT5G57800	7.11e-129	0.449613	0.324	0.014	1.47e-124
AT2G19710	7.73e-129	0.308411	0.204	0.004	1.6e-124
AT3G07340	7.83e-129	0.59382	0.246	0.007	1.62e-124
AT5G43450	8.79e-129	0.717665	0.352	0.017	1.82e-124
AT5G66580	1.13e-128	1.09918	0.31	0.012	2.35e-124
AT3G15480	1.39e-128	0.516827	0.415	0.025	2.87e-124
AT5G60170	1.82e-128	0.547185	0.338	0.015	3.77e-124
AT5G10480	3.22e-128	0.554711	0.282	0.01	6.68e-124
AT1G64990	3.57e-128	0.615991	0.254	0.007	7.4e-124
AT3G16770	4.04e-128	0.545181	0.599	0.053	8.38e-124
AT1G22200	4.24e-128	0.35274	0.254	0.007	8.78e-124
ATCG00150	5.05e-128	0.459356	0.38	0.02	1.05e-123
AT4G27740	5.64e-128	0.542136	0.345	0.016	1.17e-123
AT3G03850	5.85e-128	0.82856	0.225	0.005	1.21e-123
AT1G19210	9.09e-128	1.61686	0.331	0.015	1.88e-123
AT2G30110	9.51e-128	0.351845	0.31	0.012	1.97e-123
AT5G41400	1.52e-127	0.853491	0.331	0.015	3.16e-123
ATCG00160	1.62e-127	0.461328	0.352	0.017	3.36e-123
AT1G01620	2.07e-127	0.718509	0.57	0.049	4.29e-123
AT1G10630	2.19e-127	0.269308	0.352	0.017	4.53e-123
AT1G58420	2.38e-127	0.949746	0.239	0.006	4.93e-123
AT4G31860	2.55e-127	0.724279	0.282	0.01	5.29e-123
AT3G59080	2.78e-127	0.468819	0.268	0.009	5.76e-123
AT3G62860	3.05e-127	0.426973	0.218	0.005	6.33e-123
AT4G37460	4.02e-127	0.473886	0.423	0.026	8.34e-123
AT3G03840	4.4e-127	0.878143	0.218	0.005	9.12e-123
AT3G17850	4.52e-127	0.463541	0.296	0.011	9.37e-123
AT4G04840	5.88e-127	1.84078	0.5	0.037	1.22e-122
AT4G10080	6e-127	0.572781	0.394	0.022	1.24e-122
AT3G13062	6.08e-127	0.806011	0.38	0.021	1.26e-122
AT2G47470	6.28e-127	0.440615	0.338	0.016	1.3e-122
AT5G65930	6.73e-127	0.371995	0.289	0.01	1.4e-122
AT4G33910	8.13e-127	0.547298	0.232	0.006	1.69e-122
AT1G17420	1.32e-126	1.92689	0.599	0.056	2.73e-122
AT3G50700	1.34e-126	0.46516	0.211	0.004	2.79e-122
AT3G10260	1.42e-126	0.601261	0.317	0.013	2.95e-122
AT3G56000	1.45e-126	0.347672	0.162	0.001	3e-122
AT2G38995	1.49e-126	0.646031	0.162	0.001	3.1e-122
AT3G14840	1.56e-126	0.622978	0.366	0.019	3.23e-122
AT1G21080	1.71e-126	0.423288	0.387	0.022	3.55e-122
AT1G70100	1.84e-126	0.426237	0.394	0.022	3.82e-122
AT5G63530	1.86e-126	0.378022	0.415	0.025	3.86e-122
AT2G17970	2.13e-126	0.399734	0.204	0.004	4.41e-122
AT3G45290	2.18e-126	0.405125	0.183	0.003	4.52e-122
AT2G45910	2.22e-126	0.40484	0.246	0.007	4.61e-122
AT1G79500	2.35e-126	0.309742	0.211	0.004	4.88e-122
AT2G18290	2.37e-126	0.338348	0.246	0.007	4.92e-122
AT2G03980	2.46e-126	0.480246	0.246	0.007	5.1e-122
AT2G16940	3.01e-126	0.503418	0.542	0.045	6.25e-122
AT5G57565	3.42e-126	0.399693	0.296	0.011	7.09e-122
AT1G62422	3.42e-126	0.703236	0.296	0.011	7.09e-122
AT1G33230	3.67e-126	0.480912	0.254	0.007	7.61e-122
AT4G17500	4.73e-126	1.16211	0.514	0.04	9.82e-122
AT5G66490	6.31e-126	0.307834	0.324	0.014	1.31e-121
AT1G01140	6.77e-126	1.01023	0.627	0.059	1.4e-121
AT3G15710	6.78e-126	0.491386	0.254	0.007	1.41e-121
AT2G37080	6.97e-126	0.37578	0.204	0.004	1.45e-121
AT5G42080	7.26e-126	0.343012	0.331	0.015	1.5e-121
AT1G70290	7.71e-126	0.568754	0.535	0.043	1.6e-121
AT3G16840	7.77e-126	0.399369	0.317	0.013	1.61e-121
AT4G04620	7.97e-126	0.710465	0.268	0.009	1.65e-121
AT3G57930	8.12e-126	0.580673	0.444	0.029	1.68e-121
AT2G44430	9.33e-126	0.467605	0.261	0.008	1.93e-121
AT3G10300	9.5e-126	0.882362	0.338	0.016	1.97e-121
AT1G75380	9.87e-126	0.626919	0.627	0.06	2.05e-121
AT1G54730	1.09e-125	0.364132	0.225	0.005	2.25e-121
AT3G02170	1.09e-125	0.556419	0.317	0.013	2.25e-121
AT3G23980	1.24e-125	0.397566	0.239	0.006	2.56e-121
AT5G58900	1.33e-125	0.591788	0.239	0.006	2.76e-121
AT3G17390	1.35e-125	0.433258	0.62	0.058	2.8e-121
AT5G49530	1.47e-125	0.502825	0.239	0.006	3.06e-121
AT4G13180	1.58e-125	0.697762	0.289	0.011	3.27e-121
AT5G62280	1.81e-125	1.63877	0.387	0.022	3.75e-121
AT5G21100	2.06e-125	0.563226	0.289	0.011	4.27e-121
AT1G11050	2.48e-125	0.685595	0.268	0.009	5.14e-121
AT5G05270	2.72e-125	0.535482	0.239	0.006	5.63e-121
AT4G18975	3.5e-125	0.312397	0.289	0.011	7.27e-121
AT2G30360	3.71e-125	0.848653	0.31	0.013	7.69e-121
AT1G79160	4.16e-125	0.694123	0.268	0.009	8.63e-121
AT1G03370	4.91e-125	0.533189	0.268	0.009	1.02e-120
AT4G02500	5.79e-125	0.483709	0.303	0.012	1.2e-120
AT1G56510	7.11e-125	0.942619	0.577	0.051	1.47e-120
AT2G32190	7.74e-125	0.938651	0.169	0.002	1.6e-120
AT5G59820	8.24e-125	1.58635	0.577	0.051	1.71e-120
AT1G71070	1.21e-124	0.684047	0.218	0.005	2.5e-120
AT2G46800	1.53e-124	0.69894	0.345	0.017	3.17e-120
AT5G66050	1.58e-124	0.413879	0.246	0.007	3.28e-120
AT2G47730	1.63e-124	1.79428	0.93	0.133	3.38e-120
AT5G19290	1.66e-124	0.412345	0.303	0.012	3.45e-120
AT2G38820	1.71e-124	0.480409	0.296	0.012	3.55e-120
AT5G18590	2.15e-124	0.351682	0.218	0.005	4.45e-120
AT2G22540	2.74e-124	0.6454	0.437	0.029	5.68e-120
AT3G11910	3.48e-124	0.29649	0.331	0.015	7.21e-120
AT1G78290	4.32e-124	0.691947	0.261	0.008	8.96e-120
AT1G21050	5.85e-124	0.656846	0.254	0.008	1.21e-119
AT1G21000	6.14e-124	0.493573	0.444	0.03	1.27e-119
AT5G06970	6.7e-124	0.568827	0.31	0.013	1.39e-119
AT2G36850	6.88e-124	0.50913	0.31	0.013	1.43e-119
AT1G22060	8.49e-124	0.363895	0.254	0.008	1.76e-119
AT2G27030	9.69e-124	0.288351	0.486	0.036	2.01e-119
AT4G39570	9.75e-124	0.304222	0.254	0.008	2.02e-119
AT1G73080	1.11e-123	0.634198	0.324	0.015	2.3e-119
AT3G47000	1.31e-123	0.576898	0.268	0.009	2.71e-119
AT1G09430	1.5e-123	0.358312	0.345	0.017	3.11e-119
AT1G10200	1.73e-123	0.48312	0.359	0.019	3.58e-119
AT3G57470	2.03e-123	0.425699	0.268	0.009	4.2e-119
AT5G40890	2.16e-123	0.59249	0.437	0.029	4.49e-119
AT5G43900	2.89e-123	0.438315	0.331	0.015	5.99e-119
AT3G51310	2.96e-123	0.760194	0.31	0.013	6.14e-119
AT1G06840	5.18e-123	0.384136	0.183	0.003	1.07e-118
AT5G20110	6.07e-123	0.490518	0.197	0.004	1.26e-118
AT1G61260	7.67e-123	0.421673	0.197	0.004	1.59e-118
AT4G22290	8.36e-123	0.542239	0.197	0.004	1.73e-118
AT5G08590	1.04e-122	0.483401	0.387	0.022	2.16e-118
AT3G06770	1.31e-122	0.451276	0.246	0.007	2.71e-118
AT4G24570	1.45e-122	1.97446	0.866	0.12	3.01e-118
AT4G36730	1.74e-122	0.375897	0.43	0.028	3.6e-118
AT1G31420	1.86e-122	0.509533	0.387	0.023	3.86e-118
AT3G12320	2.1e-122	0.387689	0.444	0.031	4.35e-118
AT1G56720	2.82e-122	0.461526	0.246	0.007	5.86e-118
AT1G68840	4.1e-122	1.09611	0.704	0.077	8.5e-118
AT3G16510	4.78e-122	0.664127	0.268	0.009	9.91e-118
AT1G30590	5.11e-122	0.400108	0.261	0.009	1.06e-117
AT4G38810	5.94e-122	0.601642	0.394	0.023	1.23e-117
AT5G56550	6.43e-122	1.12037	0.465	0.034	1.33e-117
AT2G47015	6.92e-122	0.651679	0.218	0.005	1.43e-117
AT3G01590	7.49e-122	0.393473	0.275	0.01	1.55e-117
AT1G14840	7.69e-122	0.540049	0.275	0.01	1.59e-117
AT1G28670	9.24e-122	0.45953	0.254	0.008	1.92e-117
AT5G28020	9.72e-122	0.626931	0.359	0.019	2.01e-117
AT1G05230	1.02e-121	0.40678	0.254	0.008	2.11e-117
AT5G45940	1.9e-121	0.533398	0.211	0.005	3.95e-117
AT2G20760	2.01e-121	0.42219	0.394	0.024	4.16e-117
AT4G08685	2.12e-121	0.503624	0.303	0.013	4.39e-117
AT2G14720	2.8e-121	0.496666	0.289	0.011	5.81e-117
AT1G20010	2.84e-121	0.321105	0.359	0.019	5.88e-117
AT1G15690	2.86e-121	0.277781	0.57	0.051	5.92e-117
AT5G01520	3.54e-121	0.751696	0.345	0.018	7.33e-117
AT3G01540	3.59e-121	0.362324	0.415	0.027	7.44e-117
AT1G49730	3.96e-121	0.409777	0.239	0.007	8.22e-117
AT5G43630	4.24e-121	0.607864	0.303	0.013	8.79e-117
AT1G80610	4.53e-121	0.642692	0.338	0.017	9.38e-117
AT5G63190	4.81e-121	0.458639	0.331	0.016	9.98e-117
AT1G72130	5.09e-121	0.496727	0.239	0.007	1.05e-116
AT4G24160	5.13e-121	0.624288	0.289	0.011	1.06e-116
AT3G28860	5.63e-121	0.680712	0.423	0.028	1.17e-116
AT1G26850	5.73e-121	0.4311	0.338	0.017	1.19e-116
AT3G20600	5.86e-121	0.745585	0.317	0.014	1.22e-116
AT2G23180	7.03e-121	0.366081	0.169	0.002	1.46e-116
AT4G24840	7.21e-121	0.341293	0.204	0.004	1.5e-116
AT2G39770	7.32e-121	0.371122	0.451	0.032	1.52e-116
AT1G01710	8.02e-121	0.445937	0.282	0.011	1.66e-116
AT1G61900	9.94e-121	0.418387	0.225	0.006	2.06e-116
AT4G36660	1.2e-120	0.617282	0.31	0.014	2.48e-116
AT5G36290	1.28e-120	0.718179	0.31	0.014	2.65e-116
AT5G57630	1.47e-120	0.507163	0.246	0.007	3.05e-116
AT5G41140	1.55e-120	0.515789	0.246	0.007	3.22e-116
AT4G38240	1.64e-120	0.556168	0.254	0.008	3.41e-116
ATCG00640	1.94e-120	0.320345	0.373	0.021	4.01e-116
AT3G49810	2.07e-120	0.544291	0.317	0.014	4.29e-116
AT4G02200	2.08e-120	0.447487	0.246	0.007	4.3e-116
ATCG00040	2.1e-120	0.748737	0.718	0.079	4.36e-116
AT1G72645	2.12e-120	0.774322	0.38	0.022	4.4e-116
AT5G25265	2.29e-120	0.51604	0.324	0.015	4.75e-116
AT2G20300	2.44e-120	0.405559	0.204	0.004	5.06e-116
AT2G18750	3.32e-120	0.526333	0.296	0.012	6.89e-116
AT5G47480	3.41e-120	0.322571	0.345	0.018	7.08e-116
ATCG00540	3.84e-120	0.530131	0.606	0.058	7.96e-116
AT1G53090	4.1e-120	0.537727	0.261	0.009	8.51e-116
AT3G03820	4.35e-120	1.34498	0.289	0.012	9.02e-116
AT1G64670	4.62e-120	0.52732	0.197	0.004	9.58e-116
AT1G02300	5.21e-120	0.491987	0.232	0.006	1.08e-115
AT3G52060	5.28e-120	0.73211	0.415	0.027	1.1e-115
AT1G74910	5.8e-120	0.306684	0.366	0.02	1.2e-115
AT4G29160	5.87e-120	0.474765	0.493	0.039	1.22e-115
AT5G07770	5.93e-120	0.624743	0.197	0.004	1.23e-115
AT4G25230	6.48e-120	0.40263	0.232	0.006	1.34e-115
AT4G11521	6.66e-120	0.330837	0.155	0.001	1.38e-115
ATCG00170	9.06e-120	0.343037	0.507	0.041	1.88e-115
ATCG00300	9.33e-120	0.5897	0.817	0.1	1.93e-115
AT4G30400	1.03e-119	0.440697	0.19	0.003	2.14e-115
AT2G01300	1.29e-119	0.655088	0.19	0.003	2.67e-115
AT5G27730	1.61e-119	0.424633	0.239	0.007	3.33e-115
AT3G49790	2.05e-119	0.297557	0.31	0.014	4.25e-115
AT3G42052.1	3.18e-119	0.514258	0.225	0.006	6.59e-115
AT3G57410	3.42e-119	0.287394	0.352	0.019	7.1e-115
AT4G34390	4.61e-119	0.559691	0.317	0.015	9.56e-115
AT3G52920	4.69e-119	0.479637	0.331	0.016	9.73e-115
AT1G01950	5.39e-119	0.596701	0.246	0.008	1.12e-114
AT3G18950	5.53e-119	0.723302	0.254	0.008	1.15e-114
AT2G35780	5.68e-119	0.423974	0.296	0.012	1.18e-114
AT2G38260	5.73e-119	0.571408	0.246	0.008	1.19e-114
AT3G02830	6.14e-119	0.293077	0.373	0.021	1.27e-114
AT1G19650	6.47e-119	0.399638	0.261	0.009	1.34e-114
AT4G32530	6.71e-119	0.366585	0.373	0.022	1.39e-114
AT1G60220	7.23e-119	0.44925	0.225	0.006	1.5e-114
AT1G75420	9.07e-119	0.420808	0.211	0.005	1.88e-114
AT5G14370	1.04e-118	0.499309	0.268	0.01	2.16e-114
AT1G66410	1.22e-118	0.287417	0.415	0.027	2.53e-114
AT3G16850	1.39e-118	0.570874	0.366	0.021	2.87e-114
AT4G12790	1.4e-118	0.548077	0.289	0.012	2.91e-114
AT4G30993	1.75e-118	0.349282	0.415	0.027	3.63e-114
AT2G40140	1.83e-118	0.631802	0.345	0.018	3.79e-114
AT5G65207	1.89e-118	0.794878	0.606	0.059	3.92e-114
AT1G53500	2.5e-118	0.35328	0.254	0.008	5.19e-114
AT2G04780	2.85e-118	0.616647	0.289	0.012	5.91e-114
AT1G30755	2.85e-118	0.718299	0.162	0.002	5.91e-114
AT4G15248	3.17e-118	0.650842	0.289	0.012	6.56e-114
AT5G43830	4.01e-118	0.365178	0.437	0.031	8.32e-114
AT2G18630	4.14e-118	0.538264	0.204	0.004	8.58e-114
AT5G04160	4.75e-118	0.407123	0.204	0.004	9.85e-114
AT4G21790	4.83e-118	0.564914	0.366	0.021	1e-113
AT5G04530	8.09e-118	0.592924	0.204	0.004	1.68e-113
AT5G25930	1.17e-117	0.471596	0.204	0.004	2.43e-113
AT4G35785	1.31e-117	0.478813	0.239	0.007	2.72e-113
AT4G08040	1.57e-117	0.611974	0.148	0.001	3.25e-113
AT2G06050	1.59e-117	1.34021	0.423	0.029	3.3e-113
AT2G38760	1.6e-117	0.316123	0.148	0.001	3.32e-113
AT3G01860	1.68e-117	0.534838	0.232	0.007	3.49e-113
AT4G10970	1.87e-117	0.428179	0.296	0.013	3.88e-113
AT1G24996	1.94e-117	0.414694	0.169	0.002	4.01e-113
ATCG00800	2.03e-117	0.565514	0.599	0.058	4.21e-113
AT1G26100	2.42e-117	0.475177	0.197	0.004	5.02e-113
AT3G30180	2.59e-117	0.787578	0.197	0.004	5.36e-113
ATCG01020	3.01e-117	0.401463	0.768	0.091	6.24e-113
AT1G06700	3.94e-117	0.612526	0.289	0.012	8.17e-113
AT1G06360	4.29e-117	0.706404	0.12	0	8.9e-113
AT3G07360	4.53e-117	0.406142	0.394	0.025	9.39e-113
AT5G21940	4.59e-117	1.14475	0.789	0.098	9.52e-113
AT1G60800	8.37e-117	0.631033	0.261	0.009	1.73e-112
AT5G66320	8.48e-117	0.30564	0.183	0.003	1.76e-112
AT1G35620	9.26e-117	0.463586	0.282	0.011	1.92e-112
AT2G39750	1.13e-116	0.299023	0.246	0.008	2.35e-112
AT2G45400	1.25e-116	0.532682	0.19	0.004	2.58e-112
AT3G50750	1.47e-116	0.393761	0.289	0.012	3.04e-112
AT4G12650	1.49e-116	0.348856	0.289	0.012	3.1e-112
AT1G01650	1.5e-116	0.656622	0.275	0.011	3.12e-112
AT3G14980	1.57e-116	0.528864	0.225	0.006	3.26e-112
AT5G13950	1.61e-116	0.664163	0.366	0.021	3.33e-112
AT3G17090	1.68e-116	0.586543	0.317	0.015	3.49e-112
AT1G22810	1.74e-116	0.73474	0.183	0.003	3.6e-112
AT5G43190	1.75e-116	0.377404	0.246	0.008	3.63e-112
AT2G41170	2.35e-116	0.668049	0.211	0.005	4.87e-112
AT3G26910	2.39e-116	0.483241	0.254	0.009	4.96e-112
AT2G22720	2.94e-116	0.375516	0.282	0.011	6.09e-112
AT5G47820	3.07e-116	0.511996	0.31	0.014	6.37e-112
AT1G45688	3.57e-116	0.369484	0.401	0.026	7.4e-112
AT3G56860	4.53e-116	0.525862	0.387	0.024	9.4e-112
AT1G68060	5.02e-116	0.577003	0.275	0.011	1.04e-111
AT4G38770	7.74e-116	0.943435	0.908	0.123	1.6e-111
AT5G54940	7.73e-116	1.30027	0.915	0.131	1.6e-111
AT1G21270	8.04e-116	0.601889	0.232	0.007	1.67e-111
AT1G12610	8.36e-116	1.40614	0.373	0.022	1.73e-111
AT3G23310	1.03e-115	0.537954	0.268	0.01	2.14e-111
AT1G28610	1.12e-115	0.438115	0.268	0.01	2.33e-111
AT2G14080	1.17e-115	0.388199	0.465	0.035	2.43e-111
AT1G70750	1.19e-115	0.543694	0.232	0.007	2.47e-111
AT3G25140	1.32e-115	0.499821	0.268	0.01	2.73e-111
AT1G07650	1.31e-115	0.500484	0.275	0.011	2.73e-111
AT1G68400	1.39e-115	0.455665	0.155	0.002	2.88e-111
AT2G05210	1.44e-115	0.384842	0.261	0.009	2.98e-111
AT4G23400	1.51e-115	0.492079	0.57	0.054	3.12e-111
AT5G55970	1.72e-115	0.552875	0.254	0.009	3.57e-111
AT4G38550	1.75e-115	0.916266	0.542	0.049	3.63e-111
AT1G04850	1.8e-115	0.402198	0.387	0.024	3.72e-111
AT5G15460	1.81e-115	0.369501	0.204	0.005	3.75e-111
AT5G18230	1.88e-115	0.376217	0.38	0.023	3.89e-111
AT3G46000	2.05e-115	0.336763	0.451	0.034	4.26e-111
AT5G62130	2.2e-115	0.501779	0.254	0.009	4.57e-111
AT2G28290	2.54e-115	0.347171	0.437	0.031	5.26e-111
AT5G52530	2.58e-115	0.454177	0.352	0.02	5.34e-111
AT2G41740	2.76e-115	0.380612	0.289	0.012	5.71e-111
AT5G06530	3.4e-115	0.435768	0.204	0.005	7.05e-111
AT5G67250	3.57e-115	0.532784	0.387	0.024	7.4e-111
AT2G25850	3.7e-115	0.310963	0.268	0.01	7.66e-111
AT3G02350	5.17e-115	0.353642	0.261	0.009	1.07e-110
AT3G15500	7.06e-115	0.853111	0.282	0.012	1.46e-110
AT4G24510	9.68e-115	0.373573	0.254	0.009	2.01e-110
AT5G11580	9.68e-115	0.388849	0.296	0.013	2.01e-110
AT2G22170	1.13e-114	0.411605	0.345	0.019	2.35e-110
AT5G47500	1.87e-114	0.758867	0.162	0.002	3.88e-110
AT1G80460	2.02e-114	0.335709	0.317	0.015	4.18e-110
AT4G35750	2.03e-114	0.614514	0.451	0.034	4.21e-110
AT1G65930	2.61e-114	0.647744	0.718	0.084	5.41e-110
AT1G21660	2.88e-114	0.44727	0.225	0.006	5.96e-110
AT1G15910	3.1e-114	0.672319	0.225	0.006	6.43e-110
AT1G65960	3.46e-114	0.254925	0.641	0.068	7.17e-110
AT1G29357	4.46e-114	0.381572	0.169	0.003	9.25e-110
AT5G53900	5.13e-114	0.450461	0.183	0.003	1.06e-109
AT5G42380	5.43e-114	1.36213	0.289	0.012	1.13e-109
AT4G39670	6.63e-114	1.03085	0.19	0.004	1.37e-109
AT1G08660	7.48e-114	0.444885	0.261	0.01	1.55e-109
AT5G39570	7.75e-114	0.37535	0.577	0.056	1.61e-109
AT2G40110	8.34e-114	0.334208	0.169	0.003	1.73e-109
AT2G36320	9.51e-114	0.399752	0.401	0.027	1.97e-109
AT1G76520	1.19e-113	0.425955	0.239	0.008	2.46e-109
AT5G36920	1.43e-113	0.503293	0.169	0.003	2.97e-109
AT2G26330	1.45e-113	0.285121	0.232	0.007	3e-109
AT1G78040	1.48e-113	0.578401	0.803	0.103	3.06e-109
AT5G27520	1.5e-113	0.909774	0.246	0.008	3.11e-109
AT2G13665	2e-113	0.375234	0.134	0.001	4.14e-109
AT5G09410	2.07e-113	0.313396	0.338	0.018	4.3e-109
AT5G43310	2.2e-113	0.672407	0.282	0.012	4.56e-109
AT5G25630	2.49e-113	0.26654	0.437	0.032	5.16e-109
AT1G19310	3.21e-113	0.449751	0.218	0.006	6.66e-109
AT3G19460	3.54e-113	0.295184	0.204	0.005	7.35e-109
AT3G57890	3.64e-113	0.272232	0.324	0.016	7.56e-109
AT5G41410	4.57e-113	0.392911	0.246	0.008	9.47e-109
ATCG00590	4.63e-113	0.354127	0.387	0.025	9.6e-109
AT5G48380	5.4e-113	0.398276	0.338	0.018	1.12e-108
AT5G01040	5.86e-113	0.634113	0.148	0.001	1.22e-108
AT5G02770	6.42e-113	0.295927	0.366	0.022	1.33e-108
AT1G22710	6.76e-113	0.680718	0.451	0.034	1.4e-108
AT3G21270	8.5e-113	0.326305	0.204	0.005	1.76e-108
AT3G11840	9.11e-113	0.703116	0.204	0.005	1.89e-108
AT2G01220	9.39e-113	0.48089	0.268	0.01	1.95e-108
AT2G34250	9.81e-113	0.371547	0.331	0.018	2.03e-108
AT1G16240	9.85e-113	0.49691	0.359	0.021	2.04e-108
AT5G01075	1.06e-112	0.508594	0.218	0.006	2.19e-108
AT4G24520	1.14e-112	0.396338	0.31	0.015	2.36e-108
AT4G02480	2.63e-112	0.355943	0.338	0.018	5.45e-108
AT1G48090	2.75e-112	0.318887	0.373	0.023	5.7e-108
AT2G30720	3.21e-112	0.70111	0.197	0.004	6.65e-108
AT5G41100	3.45e-112	0.542316	0.261	0.01	7.16e-108
AT4G16130	3.73e-112	0.554622	0.211	0.006	7.74e-108
AT5G05840	8.16e-112	0.43808	0.127	0.001	1.69e-107
AT1G09390	9.17e-112	0.288464	0.211	0.006	1.9e-107
AT2G24100	9.66e-112	0.452109	0.232	0.007	2e-107
AT1G27370	1.09e-111	0.374145	0.254	0.009	2.26e-107
AT2G46330	1.12e-111	0.517549	0.437	0.032	2.33e-107
AT4G30410	1.22e-111	0.491646	0.155	0.002	2.53e-107
AT5G41870	1.24e-111	0.35593	0.19	0.004	2.56e-107
AT1G54050	1.61e-111	0.338132	0.211	0.006	3.34e-107
AT2G04080	2.62e-111	0.369508	0.19	0.004	5.43e-107
AT5G50430	2.89e-111	0.502733	0.282	0.012	6e-107
AT3G14010	2.97e-111	0.465542	0.296	0.014	6.17e-107
AT5G25170	3.01e-111	0.370342	0.19	0.004	6.24e-107
AT4G24780	4.91e-111	0.571265	0.352	0.021	1.02e-106
AT1G13860	6.14e-111	0.391403	0.183	0.004	1.27e-106
AT1G56670	8.89e-111	0.441564	0.169	0.003	1.84e-106
AT5G66560	9.01e-111	0.433575	0.162	0.002	1.87e-106
AT4G04740	9.36e-111	0.287098	0.282	0.012	1.94e-106
AT5G07790	9.35e-111	0.403628	0.183	0.004	1.94e-106
AT5G66310	1.01e-110	0.460003	0.183	0.004	2.09e-106
AT1G80930	1.04e-110	0.338957	0.437	0.033	2.15e-106
AT5G67280	1.05e-110	0.473039	0.204	0.005	2.18e-106
AT2G46580	1.16e-110	0.379065	0.254	0.009	2.4e-106
AT2G39630	1.3e-110	0.372762	0.225	0.007	2.7e-106
AT1G58180	1.37e-110	0.636235	0.352	0.021	2.84e-106
AT5G08185	1.37e-110	0.456575	0.169	0.003	2.85e-106
AT5G58000	1.61e-110	0.488848	0.176	0.003	3.34e-106
AT4G16950	1.66e-110	0.666415	0.408	0.029	3.45e-106
AT1G34210	1.78e-110	0.404138	0.225	0.007	3.69e-106
AT1G26150	1.93e-110	0.330196	0.345	0.02	3.99e-106
AT1G69450	2.2e-110	0.337384	0.176	0.003	4.57e-106
AT3G28200	2.28e-110	0.321295	0.324	0.017	4.73e-106
AT5G51200	2.53e-110	0.447911	0.176	0.003	5.25e-106
AT5G41850	2.64e-110	0.387021	0.169	0.003	5.46e-106
AT2G17705	2.64e-110	0.427565	0.225	0.007	5.47e-106
AT5G57050	2.72e-110	0.371627	0.275	0.012	5.65e-106
AT2G37110	3.04e-110	0.526673	0.401	0.028	6.31e-106
AT2G33390	3.81e-110	0.418305	0.232	0.007	7.9e-106
AT5G57580	3.84e-110	0.377696	0.232	0.007	7.96e-106
AT2G39650	3.92e-110	0.391031	0.232	0.007	8.12e-106
AT1G28520	3.99e-110	0.342563	0.239	0.008	8.28e-106
AT1G73200	4.89e-110	0.325534	0.254	0.009	1.01e-105
AT5G61240	4.85e-110	0.534661	0.239	0.008	1.01e-105
AT4G16890	5.02e-110	0.332071	0.437	0.033	1.04e-105
AT5G19140	5.47e-110	1.32928	0.93	0.142	1.13e-105
AT3G55430	6.78e-110	0.701541	0.465	0.038	1.41e-105
AT2G46380	7.23e-110	0.387657	0.113	0	1.5e-105
AT5G26230	7.32e-110	0.756239	0.197	0.005	1.52e-105
AT4G00730	7.94e-110	0.451319	0.289	0.013	1.65e-105
AT3G49940	8.1e-110	0.67154	0.331	0.018	1.68e-105
AT5G18400	1.04e-109	0.468598	0.282	0.012	2.16e-105
AT1G79245	1.2e-109	0.762557	0.859	0.12	2.48e-105
AT4G02630	1.22e-109	0.326842	0.211	0.006	2.52e-105
AT3G16240	1.51e-109	1.79354	0.908	0.145	3.13e-105
AT5G62090	1.54e-109	0.39901	0.303	0.015	3.19e-105
AT2G34720	1.65e-109	0.347736	0.331	0.018	3.41e-105
AT1G78870	1.68e-109	0.608079	0.345	0.02	3.49e-105
AT1G54820	1.86e-109	0.346961	0.282	0.012	3.86e-105
AT4G39050	2.16e-109	0.457921	0.303	0.015	4.47e-105
AT3G23170	2.25e-109	1.10797	0.493	0.043	4.66e-105
AT4G38950	2.35e-109	0.395388	0.197	0.005	4.87e-105
AT2G02770	3.08e-109	0.378786	0.218	0.006	6.39e-105
AT2G20960	3.09e-109	0.556039	0.352	0.021	6.41e-105
ATCG00650	3.54e-109	0.298868	0.394	0.027	7.34e-105
AT1G51430	6.01e-109	0.481132	0.246	0.009	1.25e-104
AT4G23990	6.99e-109	0.359409	0.148	0.002	1.45e-104
AT4G25900	9.79e-109	0.491165	0.232	0.008	2.03e-104
AT3G27540	1.26e-108	0.770192	0.232	0.008	2.61e-104
AT4G35310	1.37e-108	0.492219	0.282	0.013	2.84e-104
AT5G07890	1.41e-108	0.454963	0.239	0.008	2.93e-104
AT3G59420	1.55e-108	0.335325	0.134	0.001	3.22e-104
AT1G10090	1.58e-108	0.318519	0.225	0.007	3.28e-104
AT3G30300	1.97e-108	0.430055	0.282	0.013	4.09e-104
AT1G08680	2.1e-108	0.463201	0.232	0.008	4.36e-104
AT5G54490	2.45e-108	0.972242	0.317	0.017	5.07e-104
AT5G38980	2.67e-108	0.502505	0.697	0.083	5.54e-104
AT3G50670	2.84e-108	0.45404	0.423	0.032	5.9e-104
AT5G16730	3.04e-108	0.375293	0.43	0.032	6.3e-104
AT1G55325	3.25e-108	0.500168	0.239	0.008	6.74e-104
AT1G44350	3.29e-108	0.483644	0.232	0.008	6.83e-104
AT2G19810	3.94e-108	0.421823	0.239	0.008	8.17e-104
AT5G63130	4.68e-108	0.858902	0.324	0.018	9.7e-104
AT2G40000	4.98e-108	1.10831	0.937	0.142	1.03e-103
AT2G42270	5.13e-108	0.335256	0.352	0.021	1.06e-103
AT1G53380	5.27e-108	0.445601	0.183	0.004	1.09e-103
ATCG00070	5.42e-108	0.608316	0.331	0.018	1.12e-103
AT5G49460	5.81e-108	0.283171	0.183	0.004	1.21e-103
AT1G18670	7.39e-108	0.373938	0.155	0.002	1.53e-103
AT2G33150	7.42e-108	0.29101	0.465	0.038	1.54e-103
AT5G61570	8.22e-108	0.365543	0.155	0.002	1.7e-103
AT4G32660	8.42e-108	0.590355	0.254	0.01	1.75e-103
AT5G41460	1.15e-107	0.394612	0.176	0.003	2.38e-103
AT1G59610	1.33e-107	0.365636	0.366	0.023	2.75e-103
ATCG00440	1.43e-107	0.361652	0.5	0.044	2.97e-103
AT1G80980	1.59e-107	0.363022	0.169	0.003	3.29e-103
AT3G50060	2.06e-107	0.572079	0.472	0.04	4.27e-103
AT4G29890	2.1e-107	0.383134	0.197	0.005	4.36e-103
AT5G47730	2.21e-107	0.260199	0.211	0.006	4.59e-103
AT1G77220	2.22e-107	0.366204	0.197	0.005	4.6e-103
AT5G46690	2.34e-107	0.640648	0.197	0.005	4.85e-103
AT1G25425	2.34e-107	0.321956	0.176	0.003	4.86e-103
AT4G00180	2.92e-107	0.429855	0.254	0.01	6.05e-103
AT4G34250	3.13e-107	0.532616	0.176	0.003	6.48e-103
AT3G22820	3.16e-107	0.440427	0.169	0.003	6.54e-103
AT2G41090	3.18e-107	0.30794	0.5	0.044	6.59e-103
AT3G61860	4.88e-107	0.388426	0.289	0.014	1.01e-102
AT1G10940	6.62e-107	0.327433	0.331	0.019	1.37e-102
AT1G28440	6.6e-107	0.474938	0.218	0.007	1.37e-102
AT3G25840	7.05e-107	0.318575	0.479	0.041	1.46e-102
AT1G51690	7.47e-107	0.385096	0.289	0.014	1.55e-102
AT2G29450	7.58e-107	0.724055	0.5	0.045	1.57e-102
AT1G53590	9.53e-107	0.578988	0.246	0.009	1.98e-102
AT2G43080	1.08e-106	0.508014	0.19	0.004	2.24e-102
AT1G75020	2.17e-106	0.486149	0.204	0.006	4.5e-102
AT1G17980	2.79e-106	0.456376	0.261	0.011	5.79e-102
AT3G61550	2.84e-106	0.32248	0.225	0.007	5.88e-102
AT3G17800	2.96e-106	1.84738	0.683	0.086	6.14e-102
AT3G62660	3.06e-106	0.405898	0.204	0.006	6.34e-102
AT5G53760	3.23e-106	0.367842	0.141	0.001	6.69e-102
AT4G02850	5.1e-106	0.635587	0.19	0.004	1.06e-101
AT3G12360	6.46e-106	0.464013	0.268	0.012	1.34e-101
AT5G55390	8.99e-106	0.307616	0.254	0.01	1.86e-101
AT2G21380	1.01e-105	0.299713	0.282	0.013	2.1e-101
AT2G39250	1.07e-105	0.465722	0.324	0.018	2.21e-101
ATCG00360	1.14e-105	0.297686	0.275	0.012	2.36e-101
AT3G47800	1.26e-105	0.486893	0.211	0.006	2.62e-101
AT5G06600	1.3e-105	0.325081	0.359	0.023	2.69e-101
AT2G30880	1.32e-105	0.393772	0.211	0.006	2.73e-101
AT3G10020	1.48e-105	0.942593	0.549	0.055	3.07e-101
AT4G23170	1.53e-105	0.543569	0.183	0.004	3.18e-101
AT4G08980	1.82e-105	0.375361	0.31	0.016	3.77e-101
AT5G01950	2.23e-105	0.594547	0.239	0.009	4.63e-101
AT4G14500	2.41e-105	0.379186	0.289	0.014	5e-101
AT3G02110	2.48e-105	0.307486	0.183	0.004	5.15e-101
AT5G10550	2.67e-105	0.907724	0.401	0.029	5.53e-101
AT2G36770	2.8e-105	0.567114	0.183	0.004	5.81e-101
AT5G11650	2.84e-105	0.626079	0.232	0.008	5.9e-101
AT3G13410	2.97e-105	0.288686	0.359	0.023	6.16e-101
AT1G29690	3.02e-105	0.514471	0.275	0.012	6.26e-101
AT5G03830	3.12e-105	0.484777	0.197	0.005	6.47e-101
AT3G60320	3.16e-105	0.275747	0.282	0.013	6.55e-101
AT3G17365	3.35e-105	0.414939	0.176	0.004	6.94e-101
AT5G51430	3.71e-105	0.365863	0.197	0.005	7.69e-101
AT4G29520	4.08e-105	0.396329	0.148	0.002	8.47e-101
AT2G35658	4.15e-105	0.608282	0.176	0.004	8.61e-101
AT5G22630	4.38e-105	0.314298	0.246	0.009	9.09e-101
AT5G11740	4.69e-105	1.11705	0.88	0.132	9.71e-101
AT3G44200	5.1e-105	0.414931	0.218	0.007	1.06e-100
AT3G16785	5.89e-105	0.509311	0.261	0.011	1.22e-100
AT5G65910	6.25e-105	0.361705	0.232	0.008	1.3e-100
AT2G22810	6.35e-105	0.925933	0.148	0.002	1.32e-100
AT5G18100	6.41e-105	0.538513	0.324	0.018	1.33e-100
AT1G30690	6.77e-105	0.417132	0.31	0.016	1.4e-100
AT5G27970	7.15e-105	0.306617	0.225	0.007	1.48e-100
AT3G60220	7.86e-105	0.314918	0.12	0.001	1.63e-100
AT4G19160	7.9e-105	0.540119	0.444	0.036	1.64e-100
AT3G59920	7.94e-105	0.428147	0.275	0.012	1.65e-100
AT4G39080	8.56e-105	0.261923	0.387	0.027	1.77e-100
AT1G79750	8.62e-105	0.356035	0.331	0.019	1.79e-100
ATCG00710	9.49e-105	0.398901	0.31	0.016	1.97e-100
AT5G07110	9.55e-105	0.318179	0.225	0.007	1.98e-100
AT4G26400	1.22e-104	0.291023	0.232	0.008	2.53e-100
AT3G17609	1.3e-104	0.485287	0.303	0.016	2.7e-100
AT3G52290	1.55e-104	0.411986	0.155	0.002	3.22e-100
AT5G13710	1.58e-104	0.518198	0.296	0.015	3.28e-100
AT5G65140	2.01e-104	0.629253	0.162	0.003	4.16e-100
AT1G10950	2.03e-104	0.294102	0.296	0.015	4.2e-100
AT3G01980	2.08e-104	0.365377	0.204	0.006	4.32e-100
AT4G17190	2.23e-104	0.388551	0.169	0.003	4.63e-100
AT1G22430	2.43e-104	0.490641	0.317	0.018	5.03e-100
AT1G72240	2.87e-104	0.596739	0.162	0.003	5.95e-100
AT5G65270	4.21e-104	0.312768	0.204	0.006	8.72e-100
AT1G14280	4.43e-104	0.569628	0.345	0.021	9.19e-100
AT5G43880	5.48e-104	0.378724	0.204	0.006	1.14e-99
AT1G63120	6.39e-104	0.266449	0.19	0.005	1.33e-99
AT2G13560	7.13e-104	0.448705	0.296	0.015	1.48e-99
AT1G68440	9.17e-104	0.418977	0.324	0.019	1.9e-99
AT3G14150	9.14e-104	0.442056	0.211	0.006	1.9e-99
AT1G09970	9.19e-104	0.45547	0.317	0.018	1.91e-99
AT4G13020	1.48e-103	0.330569	0.289	0.014	3.08e-99
AT3G15510	1.5e-103	0.527692	0.218	0.007	3.11e-99
AT1G56220	1.56e-103	1.06247	0.852	0.124	3.23e-99
AT1G32400	1.6e-103	0.28598	0.338	0.021	3.33e-99
AT3G62720	1.63e-103	0.59437	0.254	0.01	3.38e-99
AT1G67880	1.64e-103	0.406312	0.225	0.008	3.4e-99
AT1G04295	1.66e-103	0.299882	0.113	0	3.45e-99
AT5G65060	1.76e-103	0.51299	0.232	0.008	3.64e-99
AT1G53440	1.77e-103	0.567212	0.232	0.008	3.66e-99
AT3G47060	1.99e-103	0.277408	0.211	0.006	4.14e-99
AT2G23985	2.08e-103	0.394529	0.232	0.008	4.32e-99
AT3G61460	2.19e-103	0.664339	0.268	0.012	4.54e-99
AT4G00050	2.26e-103	0.543609	0.296	0.015	4.7e-99
AT5G64260	2.47e-103	0.799598	0.331	0.02	5.12e-99
AT5G63370	2.47e-103	0.411626	0.366	0.024	5.13e-99
AT1G13245	2.55e-103	0.820986	0.479	0.043	5.28e-99
AT1G66200	2.73e-103	0.402534	0.683	0.084	5.65e-99
AT5G47220	2.8e-103	0.625606	0.317	0.018	5.81e-99
AT5G12480	2.83e-103	0.314911	0.218	0.007	5.87e-99
AT3G56360	3.22e-103	0.890121	0.697	0.088	6.67e-99
AT3G21260	4.58e-103	0.767359	0.275	0.013	9.49e-99
AT5G58040	4.74e-103	0.447748	0.289	0.014	9.84e-99
AT5G19590	5.79e-103	0.357914	0.43	0.034	1.2e-98
AT4G16900	5.87e-103	0.414719	0.197	0.005	1.22e-98
AT1G63010	5.99e-103	0.306456	0.225	0.008	1.24e-98
AT5G66930	6.15e-103	0.348828	0.254	0.01	1.27e-98
AT3G60130	6.41e-103	0.355603	0.197	0.005	1.33e-98
AT4G36030	7.08e-103	0.337276	0.183	0.004	1.47e-98
ATCG00500	7.43e-103	0.309451	0.394	0.029	1.54e-98
AT1G74160	8.01e-103	0.25201	0.225	0.008	1.66e-98
AT4G17250	8.66e-103	0.373322	0.225	0.008	1.79e-98
AT4G29190	1.23e-102	0.474936	0.345	0.022	2.56e-98
AT3G06410	1.71e-102	0.470866	0.246	0.01	3.55e-98
AT3G45600	1.95e-102	0.347781	0.31	0.017	4.04e-98
AT5G25100	2.23e-102	0.395367	0.317	0.018	4.63e-98
AT2G05940	2.32e-102	0.66209	0.303	0.016	4.81e-98
AT1G03610	2.44e-102	0.602363	0.359	0.024	5.05e-98
AT3G06080	2.61e-102	0.335047	0.373	0.026	5.41e-98
AT5G41210	2.89e-102	0.356751	0.373	0.026	5.99e-98
AT1G04360	3.63e-102	0.292862	0.141	0.002	7.52e-98
AT3G25717	4.21e-102	0.923568	0.289	0.015	8.72e-98
AT1G19000	4.94e-102	0.27801	0.634	0.074	1.03e-97
AT5G64850	4.98e-102	0.653033	0.408	0.031	1.03e-97
AT2G39130	5.2e-102	0.541295	0.211	0.007	1.08e-97
AT2G45850	5.43e-102	0.559388	0.19	0.005	1.13e-97
AT3G13310	5.72e-102	1.44109	0.317	0.018	1.19e-97
AT1G25560	5.84e-102	0.472196	0.423	0.034	1.21e-97
AT2G28310	6.71e-102	0.387326	0.225	0.008	1.39e-97
AT2G30990	6.82e-102	0.502245	0.211	0.007	1.41e-97
AT5G05690	7.2e-102	0.611835	0.359	0.024	1.49e-97
AT4G16980	7.28e-102	1.55131	0.894	0.148	1.51e-97
AT1G01540	7.52e-102	0.258909	0.268	0.012	1.56e-97
AT2G46370	7.74e-102	0.376808	0.239	0.009	1.6e-97
AT3G46550	9.06e-102	0.46856	0.254	0.011	1.88e-97
AT4G16280	9.94e-102	0.474118	0.218	0.007	2.06e-97
AT1G02080	1.03e-101	0.512814	0.303	0.016	2.13e-97
AT1G22882	1.08e-101	0.31105	0.19	0.005	2.24e-97
AT1G04140	1.1e-101	0.510886	0.254	0.011	2.28e-97
AT1G30757	1.15e-101	0.411335	0.148	0.002	2.38e-97
AT3G51980	1.18e-101	0.34664	0.169	0.003	2.44e-97
AT2G39010	1.23e-101	0.699271	0.768	0.104	2.54e-97
AT1G19970	1.34e-101	0.343734	0.169	0.003	2.79e-97
AT1G05320	1.41e-101	0.443599	0.225	0.008	2.92e-97
AT2G29390	1.53e-101	0.250531	0.218	0.007	3.18e-97
AT1G10290	1.62e-101	0.344757	0.268	0.012	3.36e-97
AT4G35470	1.65e-101	0.329455	0.232	0.009	3.42e-97
AT4G26570	1.89e-101	0.291276	0.275	0.013	3.91e-97
AT5G47430	1.96e-101	0.469481	0.303	0.016	4.06e-97
AT1G63350	2.52e-101	0.349874	0.148	0.002	5.23e-97
AT4G26760	3.03e-101	0.35495	0.155	0.003	6.29e-97
AT2G38980	3.05e-101	0.57422	0.197	0.006	6.33e-97
AT2G27170	3.42e-101	0.384415	0.275	0.013	7.09e-97
AT4G35987	3.55e-101	0.342406	0.162	0.003	7.37e-97
AT4G35985	3.87e-101	0.861579	0.261	0.012	8.03e-97
ATCG00660	3.93e-101	0.48496	0.31	0.017	8.14e-97
AT3G54950	4.23e-101	0.425627	0.162	0.003	8.76e-97
AT4G34240	4.49e-101	0.309969	0.282	0.014	9.32e-97
AT1G74930	4.56e-101	1.81134	0.732	0.101	9.45e-97
AT2G29320	4.81e-101	0.347843	0.282	0.014	9.97e-97
ATCG00420	5.19e-101	0.439333	0.472	0.042	1.08e-96
AT5G20350	7.93e-101	0.337444	0.289	0.015	1.64e-96
AT4G27430	8.13e-101	0.287069	0.359	0.024	1.69e-96
AT3G19850	8.96e-101	0.364238	0.197	0.006	1.86e-96
AT1G02270	9.37e-101	0.494736	0.232	0.009	1.94e-96
AT1G33980	9.72e-101	0.325087	0.268	0.012	2.02e-96
AT4G37540	1.1e-100	0.770415	0.373	0.026	2.28e-96
AT3G54010	1.14e-100	0.291467	0.246	0.01	2.36e-96
AT5G01820	1.24e-100	0.445674	0.338	0.021	2.56e-96
AT4G35840	1.62e-100	0.463373	0.183	0.004	3.36e-96
AT1G73830	1.9e-100	0.891624	0.232	0.009	3.93e-96
AT1G13450	2.33e-100	0.64604	0.211	0.007	4.83e-96
AT3G53270	2.43e-100	0.518519	0.204	0.006	5.03e-96
AT4G10770	2.67e-100	0.364298	0.275	0.013	5.54e-96
AT3G01430	3.06e-100	0.715651	0.211	0.007	6.35e-96
AT3G16530	3.52e-100	0.885789	0.204	0.006	7.3e-96
AT3G01210	3.64e-100	0.416209	0.218	0.007	7.54e-96
AT4G17615	3.74e-100	0.63886	0.275	0.013	7.75e-96
AT1G35460	3.79e-100	0.326523	0.232	0.009	7.85e-96
AT4G36040	3.86e-100	0.751378	0.775	0.108	8e-96
AT1G49240	4.23e-100	0.270063	0.394	0.029	8.76e-96
AT4G12760	4.42e-100	0.391979	0.211	0.007	9.17e-96
AT1G08650	5.4e-100	0.552756	0.211	0.007	1.12e-95
AT1G48960	5.51e-100	0.389392	0.211	0.007	1.14e-95
AT3G26890	5.69e-100	0.371837	0.275	0.013	1.18e-95
AT4G21430	5.95e-100	0.508227	0.204	0.006	1.23e-95
AT5G13460	6.51e-100	0.407522	0.218	0.007	1.35e-95
AT3G48860	7.56e-100	0.402031	0.225	0.008	1.57e-95
AT2G12490.1	8.21e-100	0.473482	0.246	0.01	1.7e-95
AT1G08810	1.01e-99	0.311269	0.134	0.001	2.1e-95
AT3G48090	1.07e-99	0.335388	0.211	0.007	2.23e-95
AT5G12430	1.1e-99	0.442269	0.218	0.007	2.28e-95
ATCG01070	1.15e-99	0.430393	0.303	0.017	2.39e-95
AT1G78280	1.41e-99	0.881691	0.317	0.019	2.92e-95
AT5G38210	1.49e-99	0.538639	0.246	0.01	3.08e-95
AT2G16400	1.65e-99	0.513158	0.268	0.013	3.42e-95
AT1G18620	1.79e-99	0.2518	0.338	0.021	3.72e-95
AT3G27770	1.92e-99	0.462325	0.38	0.028	3.98e-95
ATCG00130	2.38e-99	0.557617	0.782	0.109	4.92e-95
AT1G63290	2.43e-99	0.309352	0.268	0.013	5.03e-95
AT1G19400	2.63e-99	0.347552	0.38	0.028	5.46e-95
AT5G65480	3.36e-99	0.268576	0.486	0.046	6.96e-95
AT2G19950	3.69e-99	0.299669	0.239	0.01	7.64e-95
AT1G31910	3.68e-99	0.387993	0.289	0.015	7.64e-95
AT4G33050	4.27e-99	0.844201	0.268	0.013	8.85e-95
AT5G21170	4.54e-99	0.358748	0.296	0.016	9.41e-95
AT3G02750	4.91e-99	0.373722	0.254	0.011	1.02e-94
AT2G36910	5.44e-99	0.424808	0.239	0.01	1.13e-94
AT5G57887	7.2e-99	0.427638	0.246	0.01	1.49e-94
AT1G19835	7.41e-99	0.388696	0.303	0.017	1.54e-94
AT4G36970	7.76e-99	0.418688	0.232	0.009	1.61e-94
AT5G18680	8.3e-99	0.420172	0.232	0.009	1.72e-94
AT3G61830	9.11e-99	0.287792	0.169	0.004	1.89e-94
AT5G12840	9.36e-99	0.438983	0.232	0.009	1.94e-94
AT1G27210	9.77e-99	0.390671	0.232	0.009	2.02e-94
AT1G71980	1.03e-98	0.338689	0.296	0.016	2.13e-94
AT1G66190	1.04e-98	0.319293	0.169	0.004	2.15e-94
AT4G27730	1.43e-98	0.923826	0.141	0.002	2.96e-94
AT3G14440	1.49e-98	0.655391	0.338	0.022	3.09e-94
AT4G35335	1.61e-98	0.364519	0.162	0.003	3.33e-94
AT1G05200	1.71e-98	0.309904	0.246	0.01	3.55e-94
AT5G25350	1.78e-98	0.446722	0.225	0.008	3.7e-94
AT5G24810	2.07e-98	0.307298	0.31	0.018	4.29e-94
AT5G34790.1	2.21e-98	0.624981	0.183	0.005	4.59e-94
AT2G22660	2.34e-98	0.344008	0.204	0.006	4.86e-94
AT5G49360	2.57e-98	0.899488	0.528	0.054	5.32e-94
AT1G14690	3.66e-98	0.356423	0.204	0.006	7.6e-94
AT4G34000	3.89e-98	0.272275	0.465	0.043	8.07e-94
AT5G18500	4.44e-98	0.359473	0.246	0.01	9.2e-94
AT4G00355	4.75e-98	0.33363	0.289	0.015	9.86e-94
AT3G25495	4.78e-98	0.330668	0.289	0.015	9.9e-94
AT5G14430	5.39e-98	0.32367	0.239	0.01	1.12e-93
AT2G32030	5.78e-98	0.3402	0.183	0.005	1.2e-93
AT1G71950	5.91e-98	0.36476	0.401	0.032	1.23e-93
AT1G07570	6.07e-98	0.395402	0.155	0.003	1.26e-93
AT2G41540	6.31e-98	0.656833	0.148	0.002	1.31e-93
AT1G17860	7.36e-98	0.664967	0.211	0.007	1.53e-93
AT2G03760	7.86e-98	0.296874	0.211	0.007	1.63e-93
AT3G14220	1.17e-97	0.367951	0.19	0.005	2.43e-93
AT2G32240	1.64e-97	0.505749	0.317	0.019	3.4e-93
AT5G35790	1.89e-97	0.335454	0.444	0.039	3.92e-93
ATCG00180	2.14e-97	0.668458	0.43	0.036	4.43e-93
AT4G14930	2.29e-97	0.824354	0.268	0.013	4.76e-93
AT4G04200	2.31e-97	0.338638	0.176	0.004	4.8e-93
AT3G50950	2.55e-97	0.550306	0.655	0.082	5.29e-93
AT2G40150	2.66e-97	0.59821	0.176	0.004	5.51e-93
AT5G18130	2.72e-97	0.389172	0.254	0.011	5.64e-93
AT1G64400	3.06e-97	0.432814	0.239	0.01	6.35e-93
AT5G07300	3.22e-97	0.331509	0.232	0.009	6.68e-93
AT3G51960	3.49e-97	0.268333	0.127	0.001	7.24e-93
AT1G76980	4.32e-97	0.451111	0.176	0.004	8.95e-93
AT3G46460	4.42e-97	0.288469	0.232	0.009	9.16e-93
AT5G60680	4.57e-97	0.464335	0.711	0.094	9.48e-93
AT3G57640	4.77e-97	0.614153	0.225	0.009	9.88e-93
AT1G18870	5.36e-97	0.319692	0.176	0.004	1.11e-92
AT1G72710	6.41e-97	0.349278	0.345	0.023	1.33e-92
AT2G38400	7.39e-97	0.466992	0.268	0.013	1.53e-92
AT4G34450	7.81e-97	0.342248	0.282	0.015	1.62e-92
AT5G58120	7.95e-97	0.821415	0.401	0.032	1.65e-92
AT3G26280	8.43e-97	0.264271	0.197	0.006	1.75e-92
AT2G45920	8.52e-97	0.599407	0.246	0.011	1.77e-92
AT5G45750	1.04e-96	0.467029	0.275	0.014	2.15e-92
AT1G76670	1.2e-96	0.285216	0.296	0.016	2.49e-92
AT1G06670	1.42e-96	0.338051	0.282	0.015	2.94e-92
AT1G23390	1.51e-96	0.47456	0.676	0.087	3.14e-92
AT1G65370	1.56e-96	0.641778	0.169	0.004	3.24e-92
AT1G58250	1.7e-96	0.362212	0.289	0.016	3.52e-92
AT1G50140	1.87e-96	0.334566	0.239	0.01	3.88e-92
AT1G09940	2.12e-96	0.573317	0.261	0.012	4.39e-92
AT2G28890	2.55e-96	0.328018	0.204	0.007	5.29e-92
AT5G10745	2.7e-96	0.339809	0.183	0.005	5.59e-92
AT2G27080	2.95e-96	0.691772	0.366	0.026	6.11e-92
AT4G32850	3.38e-96	0.483649	0.303	0.018	7e-92
AT3G05710	3.46e-96	0.294511	0.183	0.005	7.18e-92
AT4G01200	3.51e-96	0.426024	0.169	0.004	7.28e-92
AT1G18200	3.84e-96	0.671827	0.183	0.005	7.96e-92
AT2G25950	4.04e-96	0.32669	0.183	0.005	8.38e-92
AT1G72150	5.27e-96	1.00922	0.831	0.127	1.09e-91
AT3G15790	5.75e-96	0.500442	0.352	0.025	1.19e-91
AT2G23000	5.89e-96	0.488034	0.275	0.014	1.22e-91
AT4G18070	6.4e-96	0.535527	0.282	0.015	1.33e-91
AT2G26690	6.49e-96	0.506525	0.352	0.025	1.35e-91
AT1G21730	6.71e-96	0.267481	0.183	0.005	1.39e-91
AT2G29310	7.9e-96	0.544873	0.366	0.027	1.64e-91
AT4G20780	9.78e-96	0.446918	0.134	0.002	2.03e-91
ATCG00470	1.1e-95	0.85514	0.894	0.143	2.29e-91
AT2G35050	1.42e-95	0.274673	0.282	0.015	2.95e-91
AT3G19290	1.48e-95	0.327278	0.331	0.022	3.06e-91
AT2G20840	1.55e-95	0.361086	0.19	0.006	3.21e-91
AT2G23760	1.95e-95	0.454679	0.232	0.009	4.05e-91
AT4G04692	2.06e-95	0.550802	0.359	0.026	4.27e-91
AT5G08120	2.13e-95	0.318842	0.19	0.006	4.41e-91
AT5G67190	2.23e-95	0.355526	0.254	0.012	4.63e-91
[truncated: 1,147 more rows]

## Sheet: Cluster 9
	p_val	avg_log2FC	pct.1	pct.2	p_val_adj
ATCG00440	2.68494e-148	4.03242	0.637	0.045	5.56641e-144
ATCG00570	6.47092e-144	4.39156	0.696	0.058	1.34155e-139
ATCG00300	1.61534e-126	4.04972	0.843	0.105	3.34893e-122
ATCG00820	3.32065e-122	3.93806	0.667	0.063	6.88438e-118
ATCG00790	1.19894e-117	3.66969	0.559	0.044	2.48564e-113
ATCG00130	4.44326e-114	3.99317	0.824	0.114	9.21177e-110
ATCG00470	8.24392e-114	4.29999	0.902	0.149	1.70913e-109
ATCG00080	1.34155e-110	3.74001	0.559	0.047	2.78131e-106
ATCG00150	5.43483e-109	3.15358	0.402	0.023	1.12675e-104
ATCG01020	2.73986e-108	3.9475	0.755	0.097	5.68029e-104
ATCG00720	4.48568e-106	3.95908	0.637	0.067	9.2997e-102
ATCG00540	1.02184e-105	3.63482	0.618	0.062	2.11849e-101
ATCG00040	4.66706e-103	3.76378	0.706	0.085	9.67575e-99
ATCG00740	1.75763e-101	3.32585	0.559	0.051	3.64393e-97
ATCG01130	5.36601e-100	3.51319	0.676	0.079	1.11248e-95
ATCG01050	1.42629e-95	3.38333	0.471	0.038	2.95699e-91
ATCG00340	1.9534e-95	4.17454	0.892	0.176	4.04979e-91
ATCG00380	1.43015e-94	3.8223	0.51	0.046	2.965e-90
ATCG00590	7.79626e-94	3.38907	0.402	0.027	1.61632e-89
ATCG00800	7.29945e-90	3.30247	0.578	0.063	1.51332e-85
ATCG00350	1.30984e-84	3.27225	0.422	0.034	2.71557e-80
ATCG00420	4.13064e-84	3.33586	0.48	0.046	8.56365e-80
ATCG00500	5.57354e-83	3.41112	0.402	0.032	1.15551e-78
ATCG00170	9.16587e-81	3.37458	0.471	0.045	1.90027e-76
ATCG00680	5.87693e-80	3.5024	0.637	0.088	1.21841e-75
ATCG00280	3.305e-79	3.51493	0.765	0.137	6.85193e-75
ATCG00580	2.29552e-78	3.69733	0.412	0.036	4.75908e-74
ATCG00530	5.57342e-78	3.51917	0.382	0.031	1.15548e-73
ATCG00180	8.48969e-73	3.10914	0.422	0.04	1.76008e-68
ATCG00070	9.51149e-73	3.02175	0.314	0.021	1.97192e-68
ATCG00810	2.03281e-70	3.09724	0.431	0.044	4.21443e-66
ATCG00710	4.86621e-70	2.94822	0.294	0.019	1.00886e-65
ATCG00670	1.51768e-66	2.79359	0.441	0.047	3.14645e-62
ATCG01040	5.53793e-66	2.93009	0.431	0.046	1.14812e-61
ATCG00430	6.35035e-66	2.6564	0.294	0.021	1.31655e-61
ATCG00780	8.00462e-66	3.02633	0.363	0.033	1.65952e-61
AT2G07080.1	2.05318e-61	2.75864	0.265	0.018	4.25664e-57
ATCG00160	1.02576e-60	2.7982	0.284	0.021	2.1266e-56
ATCG00650	1.05301e-57	2.65059	0.333	0.031	2.1831e-53
ATCG00490	3.06107e-57	3.37811	0.843	0.253	6.34621e-53
ATCG01070	6.25165e-56	2.69283	0.265	0.02	1.29609e-51
ATCG00480	2.88948e-55	2.77667	0.422	0.052	5.99047e-51
ATCG00120	4.65108e-54	2.79484	0.294	0.026	9.64261e-50
ATCG01090	8.45507e-47	2.49864	0.324	0.036	1.7529e-42
ATCG00660	8.97546e-46	2.50912	0.245	0.021	1.86079e-41
ATCG00220	1.66211e-45	2.39281	0.225	0.018	3.44589e-41
ATCG00140	2.30278e-43	2.21752	0.255	0.024	4.77413e-39
ATCG00290	5.88401e-43	1.86862	0.157	0.009	1.21987e-38
ATCG00270	2.09192e-42	2.42218	0.304	0.035	4.33697e-38
ATCG01010	2.96313e-40	2.55434	0.235	0.022	6.14317e-36
ATCG00190	1.24808e-39	2.46624	0.294	0.035	2.58753e-35
ATCG00520	2.65141e-38	2.25324	0.245	0.025	5.49691e-34
ATCG00560	3.30744e-35	1.57762	0.157	0.011	6.85698e-31
ATCG00750	9.61749e-34	2.0496	0.186	0.017	1.9939e-29
ATCG00640	1.44344e-33	2.21764	0.235	0.027	2.99254e-29
ATCG00770	2.06581e-33	2.31141	0.206	0.021	4.28285e-29
ATCG01100	7.63179e-33	2.15558	0.167	0.014	1.58222e-28
ATCG00020	3.38211e-29	1.96045	0.971	0.591	7.0118e-25
ATCG00730	3.45641e-28	1.98703	0.147	0.012	7.16582e-24
ATCG00510	1.71566e-27	2.38279	0.157	0.015	3.5569e-23
ATCG01120	1.45397e-24	1.74287	0.118	0.009	3.01436e-20
ATCG00360	6.41596e-24	2.24213	0.157	0.017	1.33016e-19
ATCG00630	3.61512e-23	1.36392	0.118	0.01	7.49487e-19
ATCG00550	5.63606e-23	1.73113	0.108	0.008	1.16847e-18
ATCG01080	6.03775e-22	1.54204	0.137	0.014	1.25175e-17
AT2G45960	1.52971e-07	0.975744	0.382	0.177	0.00317139
AT4G03520	5.66565e-07	0.410666	0.216	0.075	0.011746
AT5G13120	1.20878e-06	0.504711	0.137	0.039	0.0250605
AT1G16810	1.21562e-06	0.951109	0.108	0.027	0.0252023
AT4G30960	1.23588e-06	0.78584	0.235	0.091	0.0256222
AT3G16640	2.19663e-06	0.514254	0.52	0.27	0.0455405

[truncated: 2 more sheets: Cluster 10, Cluster 11]
